# Supplementary material for: Light-Mediated Transformation of Renieramycins and Semisynthesis of 4′-Pyridinecarbonyl-Substituted Renieramycin-Type Derivatives as Potential Cytotoxic Agents against Non-Small-Cell Lung Cancer Cells
Source: MDPI journal article supplement (doi:10.3390/md21070400), 2023-07-13
Supplement: s1 [file s1]

## Supporting Information

### Light-Mediated Transformation of Renieramycins and Semisynthesis of 4'-Pyridinecarbonyl-Substituted Renieramycin-Type Derivatives as Potential Cytotoxic Agents against Non-Small-Cell Lung Cancer Cells

*Suwimon Sinsook*<sup>1,2</sup>, *Koonchira Buaban*<sup>1,3</sup>, *Iksen Iksen*<sup>4</sup>, *Korrakod Petsri*<sup>4,5</sup>, *Bhurichaya Innets*<sup>4,5</sup>, *Chaisak Chansriniyom*<sup>1,3</sup>, *Khanit Suwanborirux*<sup>1,3</sup>, *Masashi Yokoya*<sup>6</sup>, *Naoki Saito*<sup>6</sup>, *Varisa Pongrakhananon*<sup>4,7</sup>, *Pithi Chanvorachote*<sup>4,5</sup> and *Supakarn Chamni*<sup>1,3,\*</sup>

<sup>1</sup> Department of Pharmacognosy and Pharmaceutical Botany, Faculty of Pharmaceutical Sciences, Chulalongkorn University, Bangkok 10330, Thailand; [nhamsuwimon1997@gmail.com](mailto:nhamsuwimon1997@gmail.com) (S.S.); [koonchi-ra.buaban@gmail.com](mailto:koonchi-ra.buaban@gmail.com) (K.B.); [chaisak.c@pharm.chula.ac.th](mailto:chaisak.c@pharm.chula.ac.th) (C.C.); [khanit.s@chula.ac.th](mailto:khanit.s@chula.ac.th) (K.S.)

<sup>2</sup> Pharmaceutical Sciences and Technology Program, Faculty of Pharmaceutical Sciences, Chulalongkorn University, Bangkok 10330, Thailand

<sup>3</sup> Natural Products and Nanoparticles Research Unit (NP2), Chulalongkorn University, Bangkok 10330, Thailand

<sup>4</sup> Department of Pharmacology and Physiology, Faculty of Pharmaceutical Sciences, Chulalongkorn University, Bangkok, 10330, Thailand; [ikseniksen08@gmail.com](mailto:ikseniksen08@gmail.com) (I.I.); [korrakod.petsri@gmail.com](mailto:korrakod.petsri@gmail.com) (K.P.); [6481004120@student.chula.ac.th](mailto:6481004120@student.chula.ac.th) (B.I.); [varisa.p@pharm.chula.ac.th](mailto:varisa.p@pharm.chula.ac.th) (V.P.); [pithi.c@chula.ac.th](mailto:pithi.c@chula.ac.th) (P.C.)

<sup>5</sup> Center of Excellence in Cancer Cell and Molecular Biology, Faculty of Pharmaceutical Sciences, Chulalongkorn University, Bangkok, 10330, Thailand

<sup>6</sup> Graduate School of Pharmaceutical Sciences, Meiji Pharmaceutical University, 2-522-1 Noshio, Kiyose, Tokyo 204-8588, Japan; [yokoya@my-pharm.ac.jp](mailto:yokoya@my-pharm.ac.jp) (M.Y.); [naoki@my-pharm.ac.jp](mailto:naoki@my-pharm.ac.jp) (N.S.)

<sup>7</sup> Preclinical Toxicity and Efficacy, Assessment of Medicines and Chemicals Research Unit, Chulalongkorn University, Bangkok, 10330 Thailand

\* Correspondence: [supakarn.c@pharm.chula.ac.th](mailto:supakarn.c@pharm.chula.ac.th); Tel.: +662-218-8357

## Table of Contents

|                                                                                                                        |    |
|------------------------------------------------------------------------------------------------------------------------|----|
| Physical and spectroscopic data of <b>7</b> .....                                                                      | 5  |
| Physical and spectroscopic data of <b>8</b> .....                                                                      | 6  |
| Physical and spectroscopic data of <b>9</b> .....                                                                      | 7  |
| Physical and spectroscopic data of <b>11</b> .....                                                                     | 11 |
| Physical and spectroscopic data of <b>12</b> .....                                                                     | 15 |
| Theoretical level of minimization of the 3D structures of <b>10</b> .....                                              | 18 |
| Theoretical level of minimization of the 3D structures of <b>11</b> .....                                              | 29 |
| Molecular docking of Ravoxertinib with both MAPK1 (ERK2).....<br>and MAPK3 (ERK1)                                      | 41 |
| Molecular docking of the protonation state of <b>10</b> and <b>11</b> .....<br>with both MAPK1 (ERK2) and MAPK3 (ERK1) | 42 |

## List of Figures

|                                                                                                 |    |
|-------------------------------------------------------------------------------------------------|----|
| <b>Figure S1.</b> $^1\text{H}$ NMR (400 MHz) spectrum of <b>9</b> in $\text{CDCl}_3$ .....      | 8  |
| <b>Figure S2.</b> $^{13}\text{C}$ NMR (100 MHz) spectrum of <b>9</b> in $\text{CDCl}_3$ .....   | 8  |
| <b>Figure S3.</b> COSY (400 MHz) spectrum of <b>9</b> in $\text{CDCl}_3$ .....                  | 9  |
| <b>Figure S4.</b> HSQC (400 MHz) spectrum of <b>9</b> in $\text{CDCl}_3$ .....                  | 9  |
| <b>Figure S5.</b> HMBC (400 MHz) spectrum of <b>9</b> in $\text{CDCl}_3$ .....                  | 10 |
| <b>Figure S6.</b> $^1\text{H}$ NMR (400 MHz) spectrum of <b>11</b> in $\text{CDCl}_3$ .....     | 12 |
| <b>Figure S7.</b> $^{13}\text{C}$ NMR (100 MHz) spectrum of <b>11</b> in $\text{CDCl}_3$ .....  | 12 |
| <b>Figure S8.</b> COSY (400 MHz) spectrum of <b>11</b> in $\text{CDCl}_3$ .....                 | 13 |
| <b>Figure S9.</b> HSQC (400 MHz) spectrum of <b>11</b> in $\text{CDCl}_3$ .....                 | 13 |
| <b>Figure S10.</b> HMBC (400 MHz) spectrum of <b>11</b> in $\text{CDCl}_3$ .....                | 14 |
| <b>Figure S11.</b> $^1\text{H}$ NMR (400 MHz) spectrum of <b>12</b> in $\text{CDCl}_3$ .....    | 16 |
| <b>Figure S12.</b> $^{13}\text{C}$ NMR (100 MHz) spectrum of <b>12</b> in $\text{CDCl}_3$ ..... | 16 |
| <b>Figure S13.</b> COSY (400 MHz) spectrum of <b>12</b> in $\text{CDCl}_3$ .....                | 17 |
| <b>Figure S14.</b> HSQC (400 MHz) spectrum of <b>12</b> in $\text{CDCl}_3$ .....                | 17 |
| <b>Figure S15.</b> HMBC (400 MHz) spectrum of <b>12</b> in $\text{CDCl}_3$ .....                | 18 |
| <b>Figure S16.</b> Molecular docking Ravoxertinib .....                                         | 40 |
| with both MAPK1 (ERK2) and MAPK3 (ERK1).                                                        |    |
| <b>Figure S17.</b> Molecular docking of the protonation state of <b>10</b> and <b>11</b> .....  | 41 |
| with both MAPK1 (ERK2) and MAPK3 (ERK1)                                                         |    |

## List of Table

|                                                                                            |    |
|--------------------------------------------------------------------------------------------|----|
| <b>Table S1.</b> Theoretical level of minimization of the 3D structures of <b>10</b> ..... | 18 |
|--------------------------------------------------------------------------------------------|----|

|                                                                                            |    |
|--------------------------------------------------------------------------------------------|----|
| <b>Table S2.</b> Theoretical level of minimization of the 3D structures of <b>11</b> ..... | 29 |
|--------------------------------------------------------------------------------------------|----|

Physical and spectroscopic data of **7**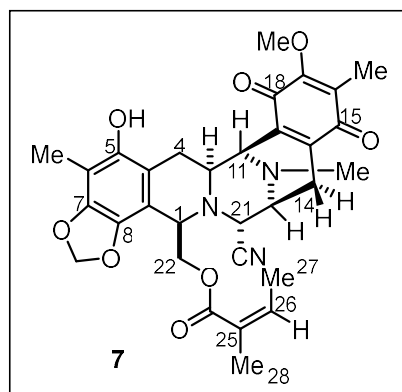

*renieramycin T* (**7**): The compound **7** was synthesized from **4**

(15 mg, 0.03 mmol) in dry CH<sub>2</sub>Cl<sub>2</sub> (20 mL) was irradiated under 4 W LED lamp (Blue light) to obtain **7**; yield 81%; yellow amorphous powder; UV (MeOH)  $\lambda_{\text{max}}$  (log  $\epsilon$ ) 268 (3.80), 370 (2.72) nm; <sup>1</sup>H NMR (CDCl<sub>3</sub>, 400 MHz)  $\delta$  in ppm: 6.00 (1H, qq,  $J$  = 7.2, 1.5 Hz, 26-H), 5.88 (2H, d,  $J$  = 26.8 Hz,

OCH<sub>2</sub>O), 4.46 (1H, br s, 5-OH), 4.42 (1H, dd,  $J$  = 11.2, 3.6 Hz,

22-H <sub>$\beta$</sub> ), 4.16 (1H, overlapped, 1-H), 4.11 (1H, d,  $J$  = 2.4 Hz, 21-H), 4.01 (1H, overlapped, 11-H),

3.99 (3H, s, 17-OCH<sub>3</sub>), 3.98 (1H, overlapped, 22-H <sub>$\alpha$</sub> ), 3.38 (1H, d,  $J$  = 6.8 Hz, 13-H), 3.25 (1H,

br d,  $J$  = 11.6 Hz, 3-H), 2.87 (1H, br d,  $J$  = 15.2 Hz, 4-H <sub>$\alpha$</sub> ), 2.77 (1H, dd,  $J$  = 17.2, 6.8 Hz, 14-

H <sub>$\alpha$</sub> ), 2.33 (1H, overlapped, 14-H <sub>$\beta$</sub> ), 2.29 (3H, s, NCH<sub>3</sub>), 2.11 (3H, s, 6-CH<sub>3</sub>), 1.94 (3H, s, 16-

CH<sub>3</sub>), 1.85 (3H, dq,  $J$  = 7.2, 1.5 Hz, 27-CH<sub>3</sub>), 1.69 (3H, s, 28-CH<sub>3</sub>), 1.67 (1H, overlapped, 4-H <sub>$\beta$</sub> );

<sup>13</sup>C NMR (CDCl<sub>3</sub>, 100 MHz)  $\delta$  in ppm: 186.1 (C-15), 182.8 (C-18), 167.1 (C-24), 155.4 (C-17),

144.9 (C-7), 144.7 (C-5), 141.7 (C-20), 139.8 (C-26), 136.9 (C-8), 135.8 (C-19), 129.0 (C-16),

126.8 (C-25), 117.5 (21-CN), 113.1 (C-10), 112.2 (C-9), 106.1 (C-6), 101.1 (OCH<sub>2</sub>O), 64.6 (C-

22), 61.0 (17-OCH<sub>3</sub>), 59.7 (C-21), 56.4 (C-1), 56.3 (C-3), 55.0 (C-11), 54.8 (C-13), 41.5 (NCH<sub>3</sub>),

26.8 (C-4), 21.2 (C-14), 20.5 (28-CH<sub>3</sub>), 15.8 (27-CH<sub>3</sub>), 8.8 (6-CH<sub>3</sub>), 8.7 (16-CH<sub>3</sub>); HRESIMS

$m/z$  576.2344 ([M+H]<sup>+</sup>, calculated for C<sub>31</sub>H<sub>34</sub>N<sub>3</sub>O<sub>8</sub>, 576.2347).

Physical and spectroscopic data of **8**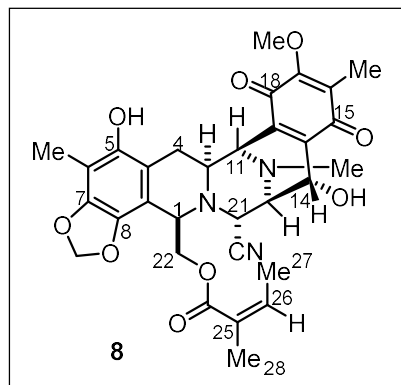

*renieramycin U* (**8**): The compound **8** was synthesized from **6** (40 mg, 0.07 mmol) in dry CH<sub>2</sub>Cl<sub>2</sub> (20 mL) was irradiated under 4 W LED lamp (Blue light) to obtain **8**; yield 48%; yellow amorphous powder;  $[\alpha]_D^{25}$   $-5.4$  ( $c$  0.71, CHCl<sub>3</sub>) (lit.  $[\alpha]_D^{23}$   $-51.3$  ( $c$  0.07, CHCl<sub>3</sub>)<sup>(1)</sup>; ECD  $\Delta\epsilon$  ( $c$  240.02  $\mu$ M, methanol, 20 °C)  $-0.5$  (296),  $-5.5$  (280),  $-12.7$  (273),  $+5.9$

(264),  $+5.0$  (260),  $-10.5$  (245),  $+18.2$  (230),  $+26.2$  (219),  $+6.3$  (214),  $+13.9$  (209),  $+7.6$  (198) nm; IR (ATR)  $\nu_{\max}$  3384 (br), 2926, 1714, 1651, 1455, 1230, 1147, 1093, 1045, 759 cm<sup>-1</sup>; UV (MeOH)  $\lambda_{\max}$  (log  $\epsilon$ ) 225 (4.11), 269 (4.04) nm; <sup>1</sup>H NMR (CDCl<sub>3</sub>, 400 MHz)  $\delta$  in ppm: 6.04 (1H, qq,  $J$  = 7.0, 1.0 Hz, 26-H), 5.95 (1H, d,  $J$  = 1.0 Hz, OCH<sub>2</sub>O), 5.88 (1H, d,  $J$  = 1.0 Hz, OCH<sub>2</sub>O), 4.43 (1H, dd,  $J$  = 11.3, 3.2 Hz, 22-H <sub>$\beta$</sub> ), 4.39 (1H, br d,  $J$  = 7.0 Hz, 14-H), 4.24 (1H, dd,  $J$  = 7.0, 2.4 Hz, 21-H), 4.16 (1H, dd,  $J$  = 4.9, 3.2 Hz, 1-H), 4.11 (1H, br d,  $J$  = 2.3 Hz, 11-H), 4.06 (3H, s, 17-OCH<sub>3</sub>), 3.96 (1H, dd,  $J$  = 11.3, 5.2 Hz, 22-H <sub>$\alpha$</sub> ), 3.52 (1H, br s, 14-OH), 3.43 (1H, dd,  $J$  = 7.0, 2.4 Hz, 13-H), 3.22 (1H, dt,  $J$  = 12.1, 2.3 Hz, 3-H), 2.88 (1H, dd,  $J$  = 15.0, 2.3 Hz, 4-H <sub>$\alpha$</sub> ), 2.49 (3H, s, NCH<sub>3</sub>), 2.13 (3H, s, 6-CH<sub>3</sub>), 1.98 (3H, s, 16-CH<sub>3</sub>), 1.91 (3H, dq,  $J$  = 7.0, 1.0 Hz, 27-CH<sub>3</sub>), 1.71 (3H, s, 28-CH<sub>3</sub>), 1.62 (1H, overlapped, 4-H <sub>$\beta$</sub> ); <sup>13</sup>C NMR (CDCl<sub>3</sub>, 100 MHz)  $\delta$  in ppm: 188.0 (C-15), 183.0 (C-18), 167.1 (C-24), 155.8 (C-17), 144.7 (C-7), 141.0 (C-5), 140.7 (C-20), 140.0 (C-8), 140.0 (C-26), 136.0 (C-19), 129.0 (C-16), 126.7 (C-25), 119.4 (C-10), 116.9 (21-CN), 112.0 (C-6), 112.0 (C-9), 101.2 (OCH<sub>2</sub>O), 64.6 (C-22), 62.7 (C-13), 62.3 (C-14), 61.1 (17-OCH<sub>3</sub>), 57.6 (C-21), 56.6 (C-1), 55.8 (C-11), 55.5 (C-3), 42.4 (NCH<sub>3</sub>), 26.7 (C-4), 20.5 (28-CH<sub>3</sub>), 15.8 (27-CH<sub>3</sub>), 8.8 (6-CH<sub>3</sub>), 8.5 (16-CH<sub>3</sub>); HRESIMS  $m/z$  592.2290 ([M+H]<sup>+</sup>, calculated for C<sub>31</sub>H<sub>34</sub>N<sub>3</sub>O<sub>9</sub>, 592.2290).

Physical and spectroscopic data of **9**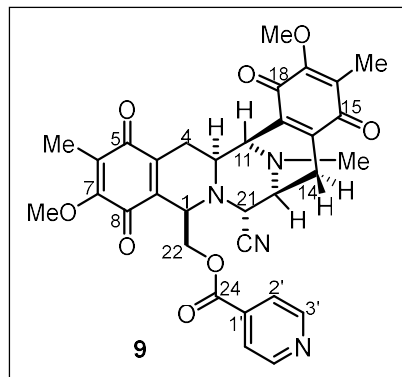

*22-O-(4'-pyridinecarbonyl) jorunnamycin A (9)*: The compound **9** was synthesized from **3** (25 mg, 0.05 mmol), DMAP (31 mg, 0.25 mmol), EDCI (49 mg, 0.25 mmol) and isonicotinoyl chloride hydrochloride (45 mg, 0.25 mmol) in dry CH<sub>2</sub>Cl<sub>2</sub> (10 mL) to obtain **9**; yield 72%; yellow amorphous powder; <sup>1</sup>H NMR (CDCl<sub>3</sub>, 400 MHz) δ in ppm: 8.68 (2H, d, *J*

= 4.4 Hz, 2'-H), 7.47 (2H, d, *J* = 4.4 Hz, 3'-H), 4.99 (1H, br d, *J* = 11.2 Hz, 22-H<sub>α</sub>), 4.16 (1H, d, *J* = 11.2 Hz, 22-H<sub>β</sub>), 4.09 (2H, s, 1-H & 21-H), 4.04 (3H, s, 7-OCH<sub>3</sub>), 3.95 (1H, s, 11-H), 3.76 (3H, s, 17-OCH<sub>3</sub>), 3.40 (1H, d, *J* = 7.2 Hz, 13-H), 3.10 (1H, d, *J* = 11.2 Hz, 3-H), 2.92 (1H, d, *J* = 17.2 Hz, 4-H<sub>α</sub>), 2.71 (1H, dd, *J* = 20.8, 7.2 Hz, 14-H<sub>α</sub>), 2.34 (1H, d, *J* = 20.8 Hz, 14-H<sub>β</sub>), 2.23 (3H, s, NCH<sub>3</sub>), 1.99 (3H, s, 6-CH<sub>3</sub>), 1.73 (3H, s, 16-CH<sub>3</sub>), 1.24 (1H, overlapped, 4-H<sub>β</sub>); <sup>13</sup>C NMR (CDCl<sub>3</sub>, 100 MHz) δ in ppm: 185.9 (C-15), 185.4 (C-5), 182.1 (C-18), 181.1 (C-8), 164.0 (C-24), 155.6 (C-7), 154.9 (C-17), 150.2 (2 × C-2'), 142.1 (C-10), 142.1 (C-20), 136.7 (C-1'), 135.1 (C-9), 134.5 (C-19), 128.9 (C-6), 128.1 (C-16), 122.7 (2 × C-3'), 116.8 (21-CN), 62.9 (C-22), 61.2 (17-OCH<sub>3</sub>), 60.9 (7-OCH<sub>3</sub>), 58.4 (C-21), 56.5 (C-1), 54.4 (C-13), 54.3 (C-3), 54.1 (C-11), 41.4 (NCH<sub>3</sub>), 25.5 (C-4), 21.0 (C-14), 8.9 (6-CH<sub>3</sub>), 8.7 (16-CH<sub>3</sub>).

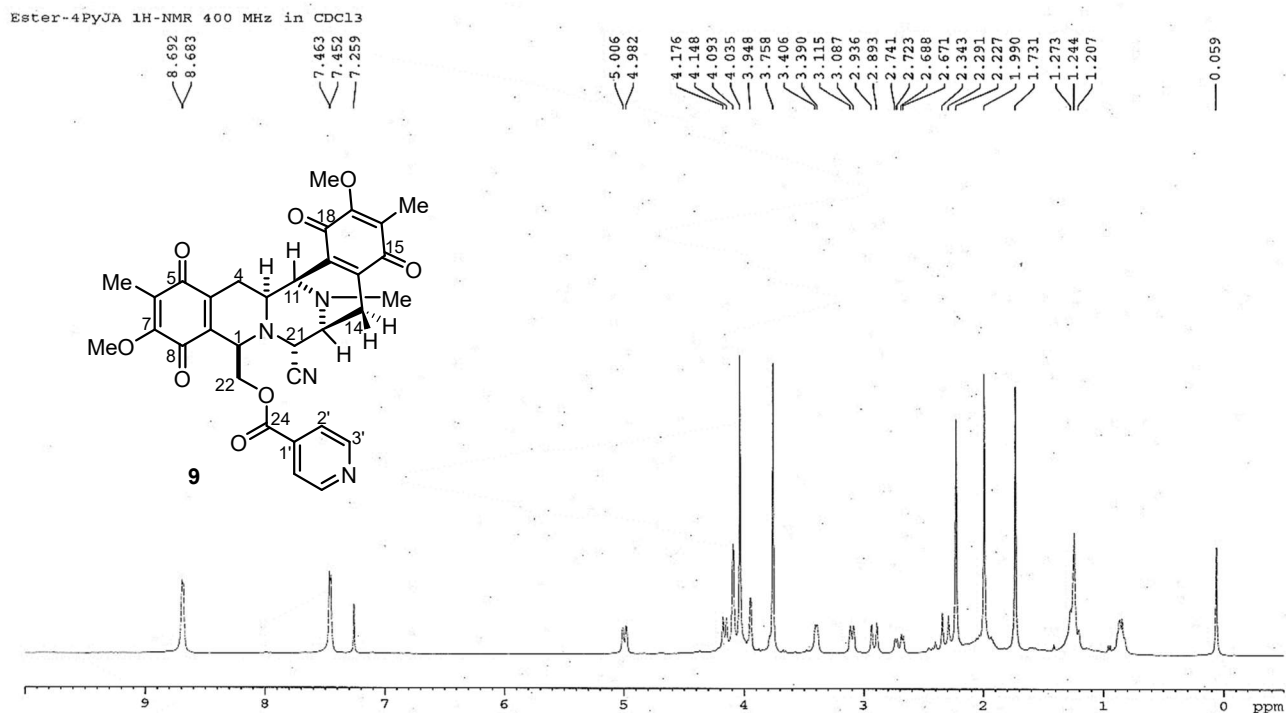

**Figure S1.** <sup>1</sup>H NMR (400 MHz) spectrum of **9** in CDCl<sub>3</sub>.

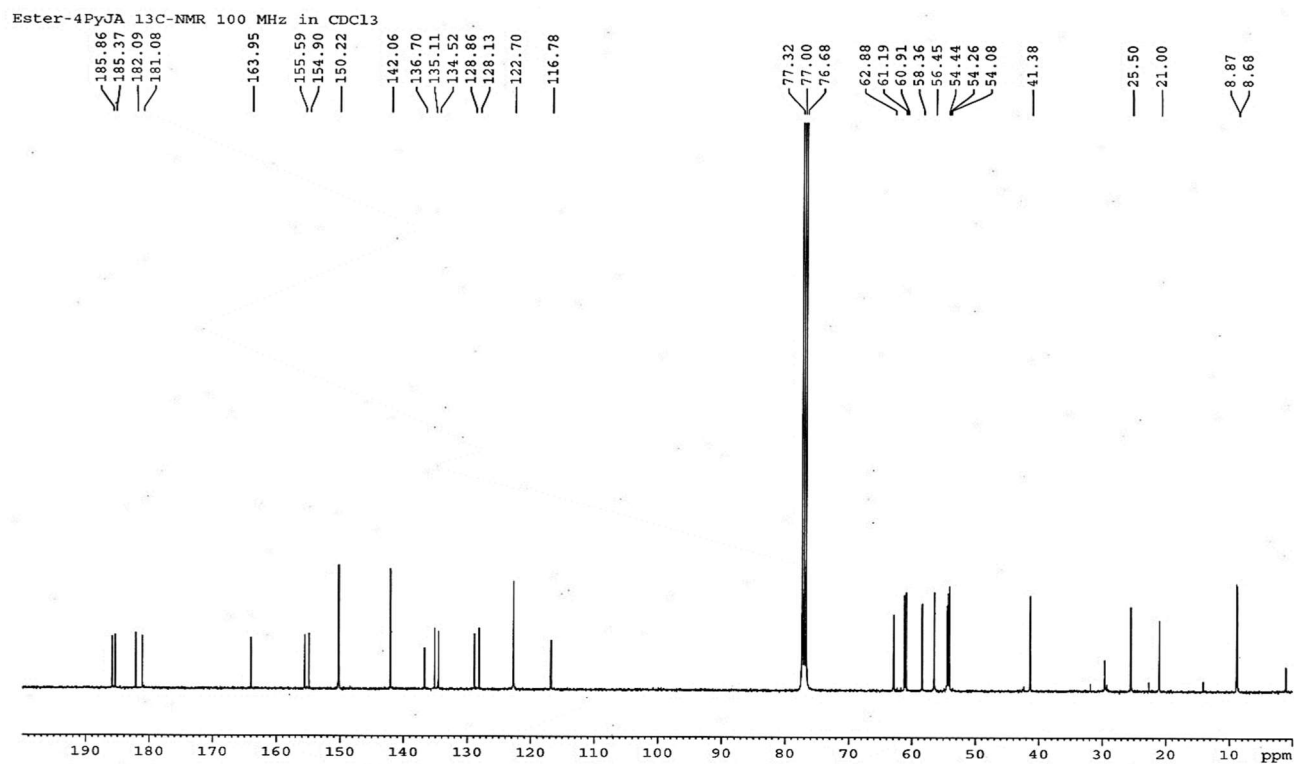

**Figure S2.** <sup>13</sup>C NMR (100 MHz) spectrum of **9** in CDCl<sub>3</sub>.



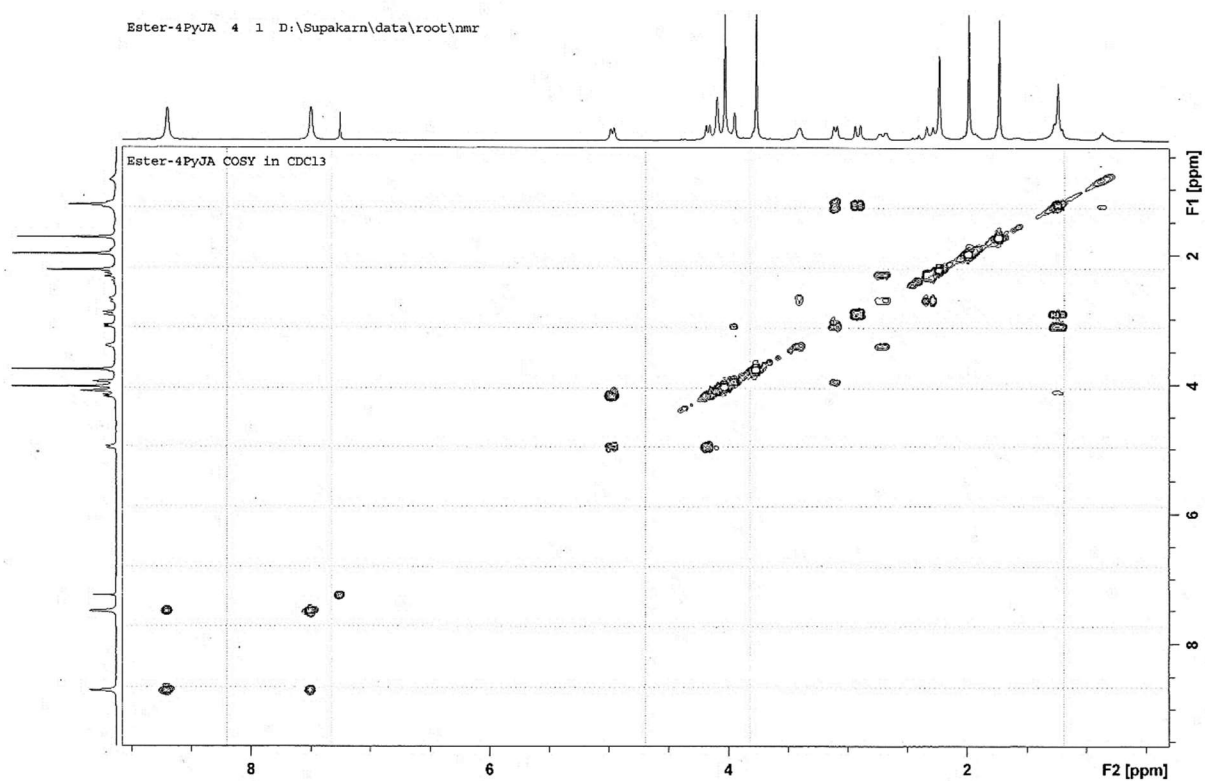

**Figure S3.** COSY (400 MHz) spectrum of **9** in CDCl<sub>3</sub>

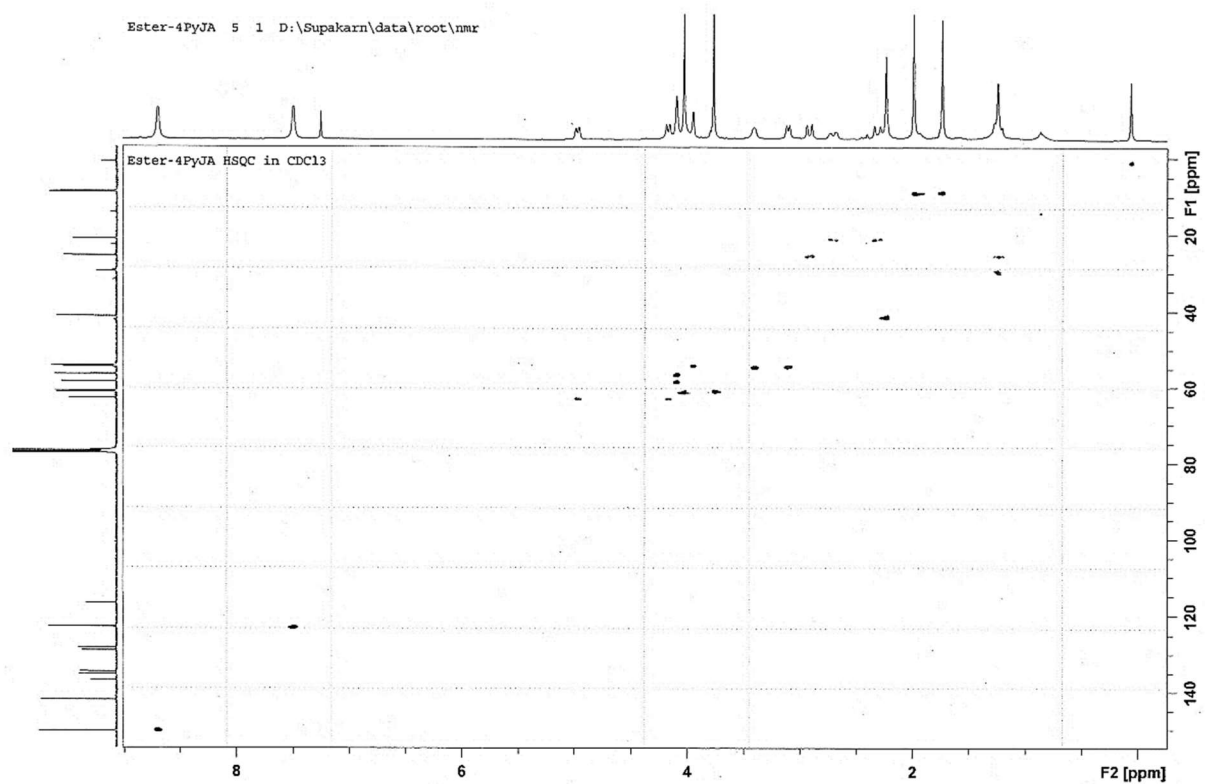

**Figure S4.** HSQC (400 MHz) spectrum of **9** in CDCl<sub>3</sub>

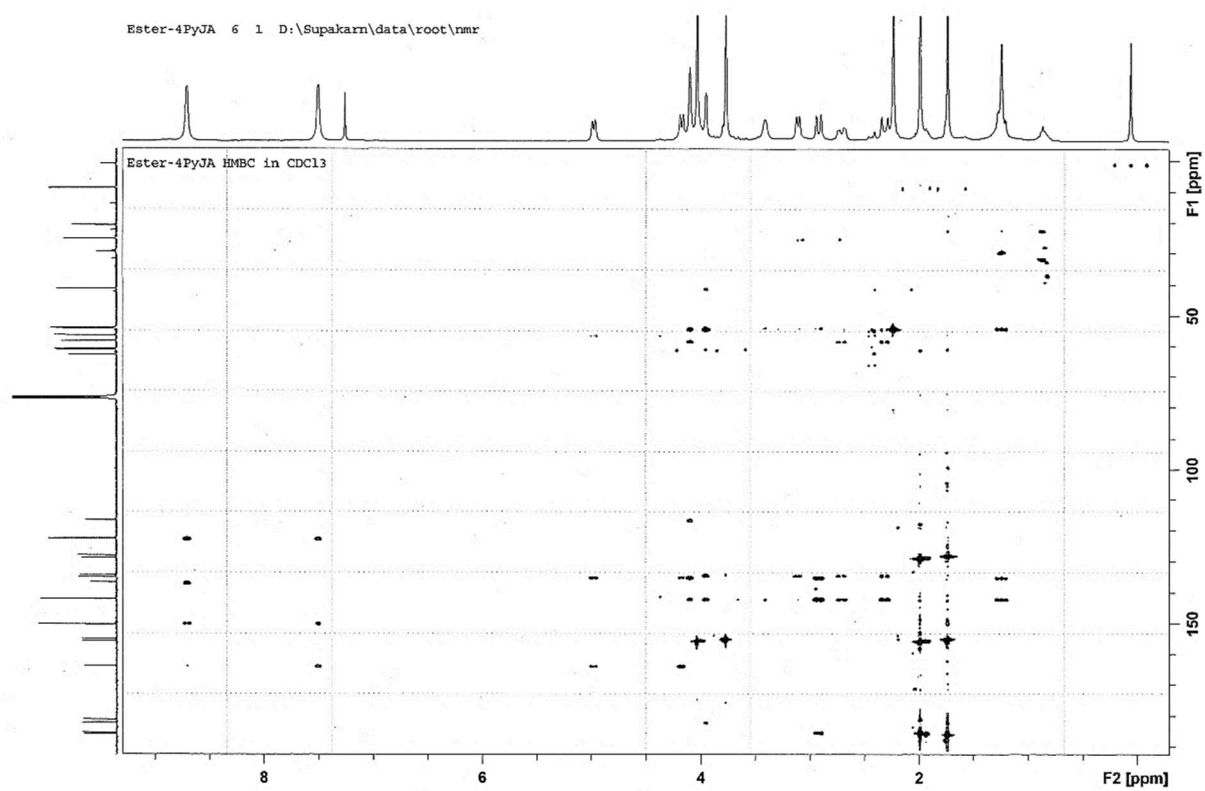

**Figure S5.** HMBC (400 MHz) spectrum of **9** in CDCl<sub>3</sub>

Physical and spectroscopic data of **11**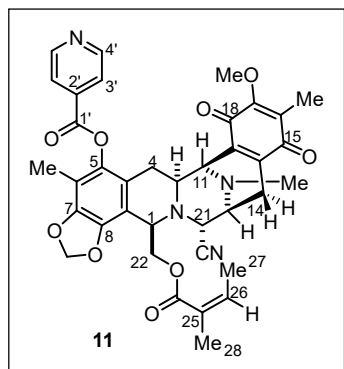

**5-O-(4'-pyridinecarbonyl) renieramycin T (11):** The compound **11** was synthesized from **7** (21 mg, 0.04 mmol), DMAP (5 mg, 0.04 mmol), EDCI (8 mg, 0.04 mmol) and isonicotinoyl chloride hydrochloride (32 mg, 0.18 mmol) in dry CH<sub>2</sub>Cl<sub>2</sub> (20 mL) to obtain **11**; yield 20%; yellow amorphous powder;  $[\alpha]_D^{25} +6.1$  (*c* 0.56, CHCl<sub>3</sub>); ECD  $\Delta\epsilon$  (*c* 15.28  $\mu$ M, methanol, 20 °C)  $-3.0$  (302),  $-13.0$

(290),  $+9.4$  (278),  $+50.7$  (264),  $+0.5$  (236),  $-59.7$  (224),  $-84.5$  (219),  $+41.3$  (210),  $-50.9$  (205),  $+47.6$  (203) nm; IR (ATR)  $\nu_{\max}$  3446 (br), 2929, 1747, 1709, 1652, 1455, 1234, 1150, 1108, 1026, 755 cm<sup>-1</sup>; <sup>1</sup>H NMR (CDCl<sub>3</sub>, 400 MHz)  $\delta$  in ppm: 8.94 (2H, d, *J* = 5.6 Hz, 4'-H), 8.06 (2H, d, *J* = 5.6 Hz, 3'-H), 6.02 (2H, d, *J* = 26.8 Hz, OCH<sub>2</sub>O), 6.01 (1H, overlapped, 26-H), 4.61 (1H, dd, *J* = 11.6, 2.8 Hz, 22-H <sub>$\alpha$</sub> ), 4.20 (1H, br t, *J* = 4.0 Hz, 1-H), 4.14 (1H, d, *J* = 2.4 Hz, 21-H), 4.05 (1H, dd, *J* = 11.6, 4.0 Hz, 22-H <sub>$\beta$</sub> ), 3.92 (1H, d, *J* = 2.4 Hz, 11-H), 3.73 (3H, s, 17-OCH<sub>3</sub>), 3.38 (1H, dd, *J* = 7.2, 2.4 Hz, 13-H), 3.26 (1H, dt, *J* = 12.0, 2.4 Hz, 3-H), 2.73 (1H, dd, *J* = 20.8, 7.2 Hz, 14-H <sub>$\alpha$</sub> ), 2.53 (1H, dd, *J* = 15.2, 1.6 Hz, 4-H <sub>$\alpha$</sub> ), 2.33 (1H, d, *J* = 20.8 Hz, 14-H <sub>$\beta$</sub> ), 2.25 (3H, s, NCH<sub>3</sub>), 2.05 (3H, s, 6-CH<sub>3</sub>), 1.89 (3H, s, 16-CH<sub>3</sub>), 1.88 (3H, dq, *J* = 7.2, 1.2 Hz, 27-CH<sub>3</sub>), 1.68 (3H, dq, *J* = 1.4, 1.2 Hz, 28-CH<sub>3</sub>), 1.61 (1H, overlapped, 4-H <sub>$\beta$</sub> ); <sup>13</sup>C NMR (CDCl<sub>3</sub>, 100 MHz)  $\delta$  in ppm: 185.8 (C-15), 182.6 (C-18), 167.0 (C-24), 162.7 (C-1'), 155.2 (C-17), 150.0 (2  $\times$  C-4'), 145.1 (C-7), 141.6 (C-20), 141.2 (C-8), 140.4 (C-26), 140.0 (C-5), 137.1 (C-2'), 135.2 (C-19), 128.8 (C-16), 126.6 (C-25), 123.5 (2  $\times$  C-3'), 120.1 (C-6), 117.2 (21-CN), 112.6 (C-10), 111.9 (C-9), 101.9 (OCH<sub>2</sub>O), 63.0 (C-22), 60.4 (17-OCH<sub>3</sub>), 58.9 (C-21), 56.5 (C-1), 55.3 (C-3), 54.7 (C-11), 54.5 (C-13), 41.4 (NCH<sub>3</sub>), 28.0 (C-4), 21.0 (C-14), 20.5 (28-CH<sub>3</sub>), 15.9 (27-CH<sub>3</sub>), 9.5 (6-CH<sub>3</sub>), 8.6 (16-CH<sub>3</sub>); HRESIMS *m/z* 681.2554 ([M+H]<sup>+</sup>, calculated for C<sub>37</sub>H<sub>37</sub>N<sub>4</sub>O<sub>9</sub>, 681.2555).

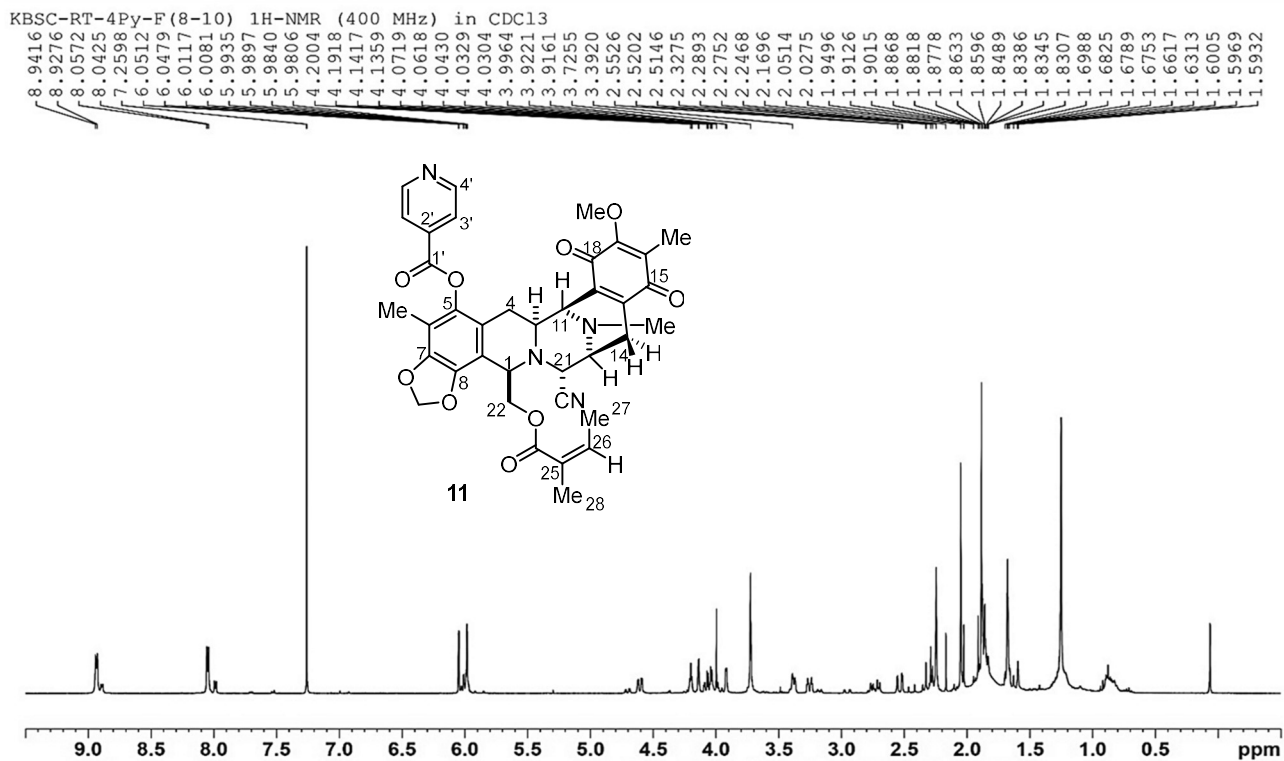

Figure S6.  $^1\text{H}$  NMR (400 MHz) spectrum of **11** in  $\text{CDCl}_3$

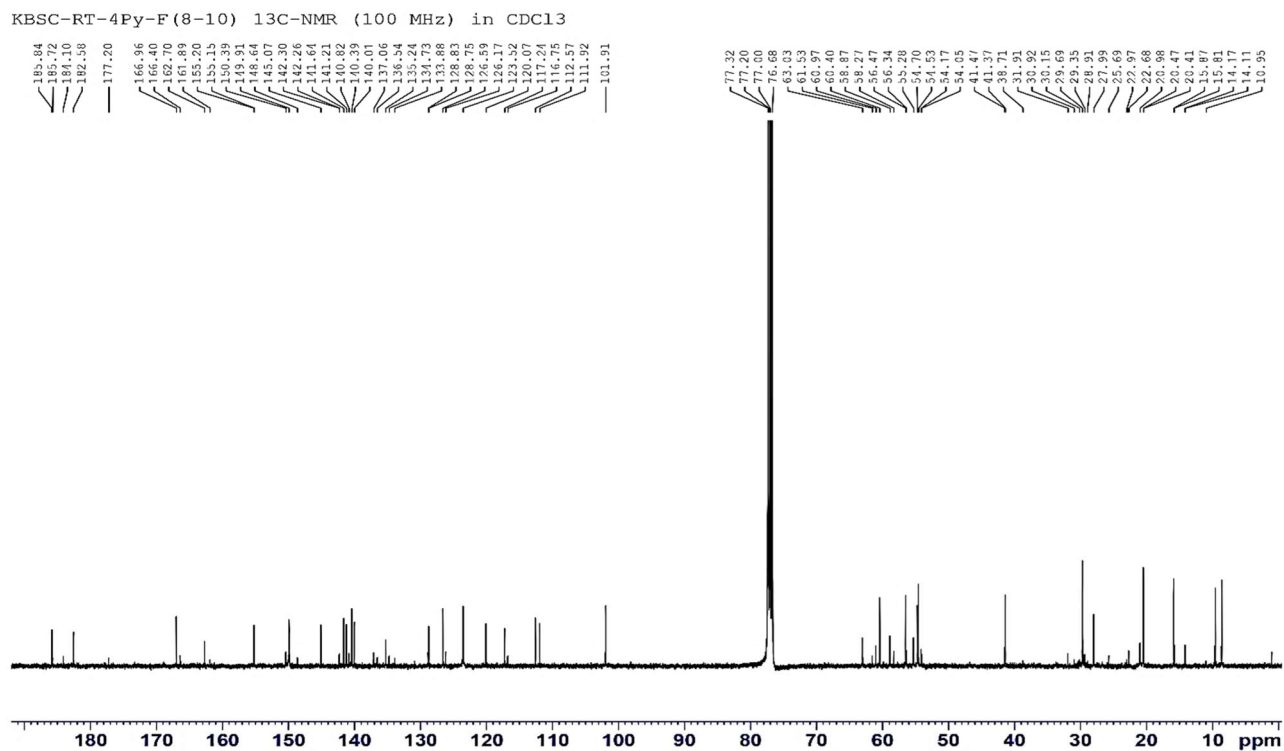

Figure S7.  $^{13}\text{C}$  NMR (100 MHz) spectrum of **11** in  $\text{CDCl}_3$

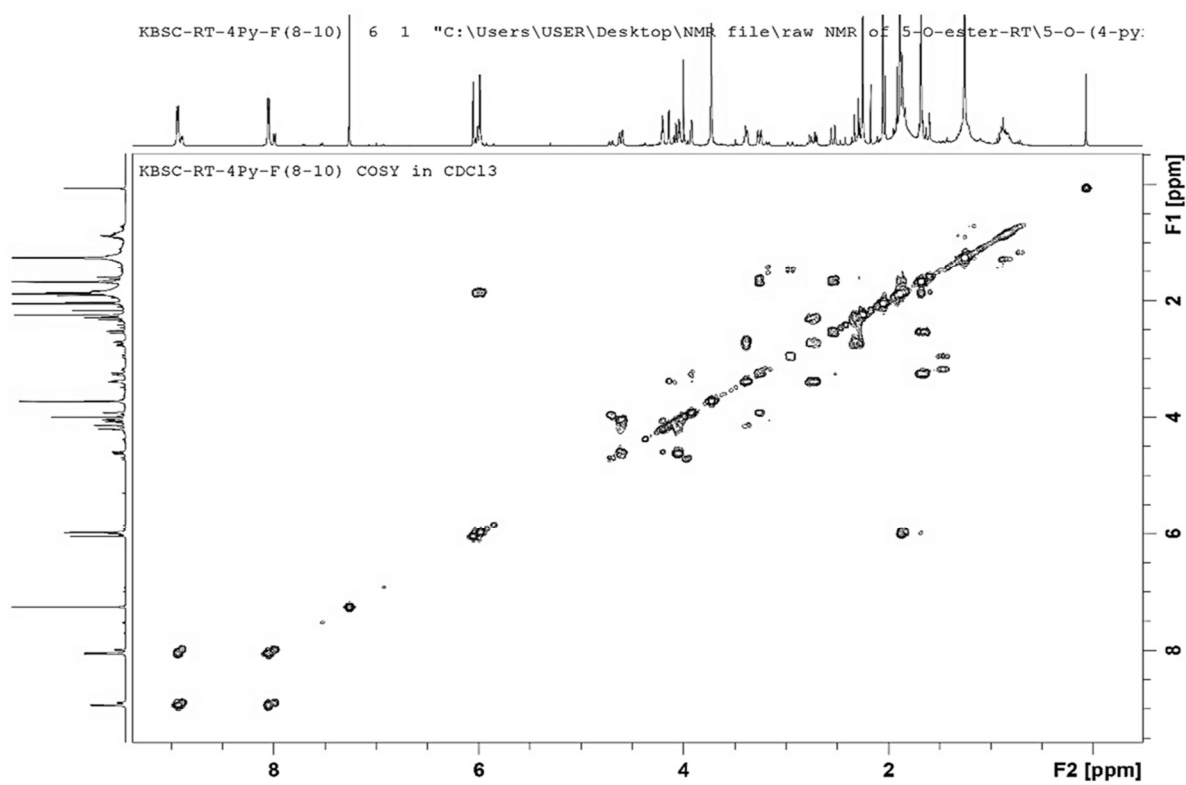

**Figure S8.** COSY (400 MHz) spectrum of **11** in CDCl<sub>3</sub>

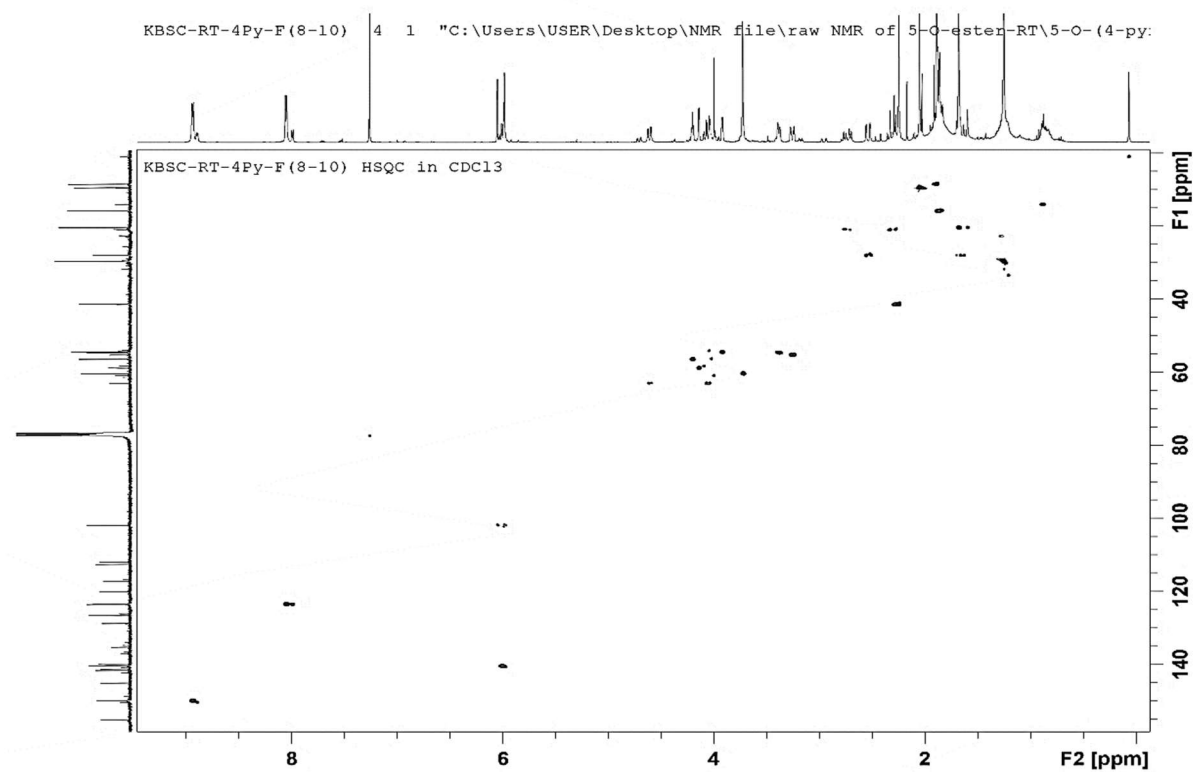

**Figure S9.** HSQC (400 MHz) spectrum of **11** in CDCl<sub>3</sub>

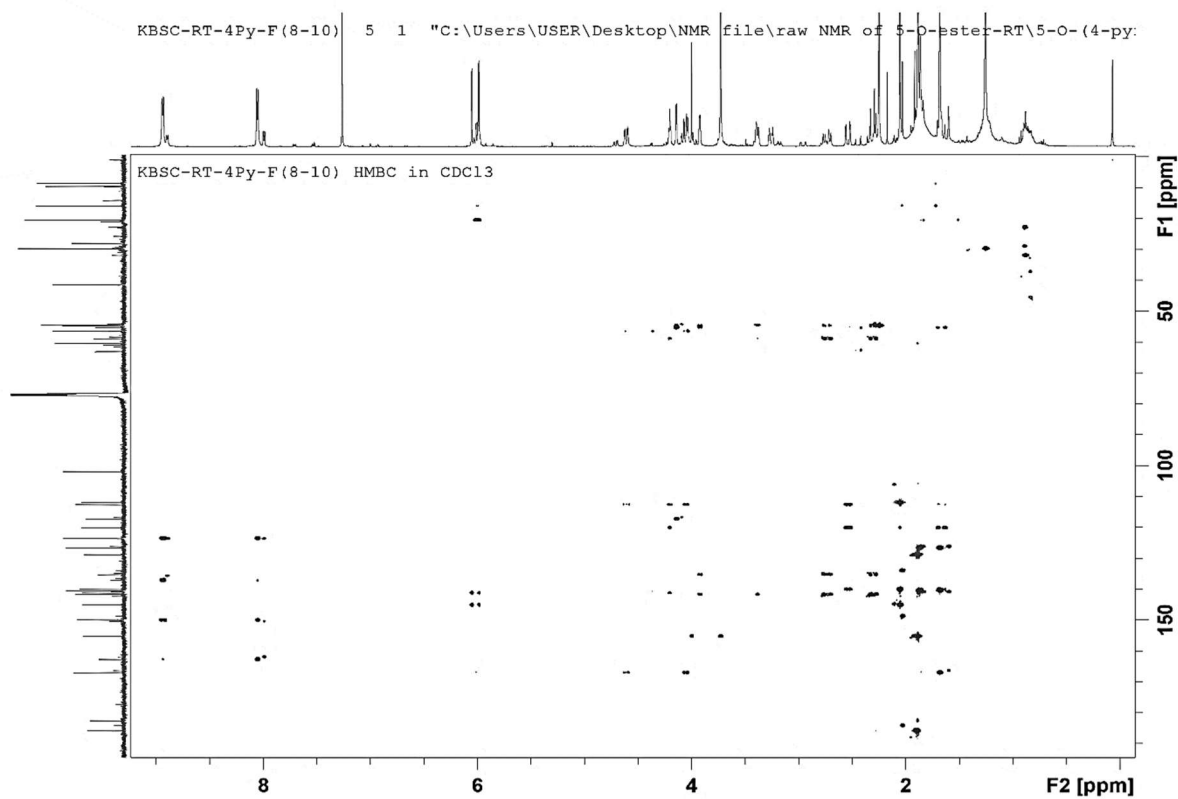

**Figure S10.** HMBC (400 MHz) spectrum of **11** in CDCl<sub>3</sub>

Physical and spectroscopic data of **12**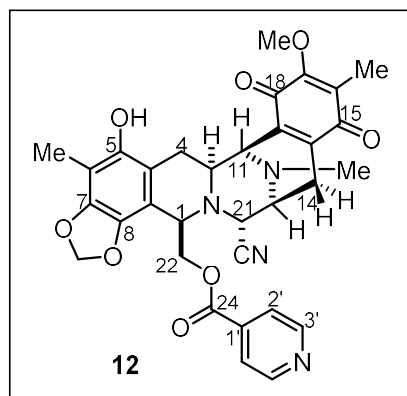

*22-O-(4'-pyridinecarbonyl) renieramycin T (12)*: The compound **12** was synthesized from **9** (6 mg, 0.01 mmol) in dry CH<sub>2</sub>Cl<sub>2</sub> (15 mL) was irradiated under 4 W LED lamp (Blue light) to obtain **12**; yield 83%; yellow amorphous powder;  $[\alpha]_{\text{D}}^{25} -20.4$  (*c* 0.37, CHCl<sub>3</sub>); ECD  $\Delta\epsilon$  (*c* 247.24  $\mu\text{M}$ , methanol, 20 °C)  $-8.1$  (345),  $-6.5$  (307),  $+7.3$  (285),  $+11.5$  (282),  $+2.0$  (264),  $-3.9$  (252),  $-5.5$  (242),  $+0.3$  (228),  $-10.9$

(210) nm; IR (ATR)  $\nu_{\text{max}}$  3279 (br), 2923, 1731, 1651, 1615, 1409, 1374, 1277, 1260, 1233, 1091, 1026, 953, 703 cm<sup>-1</sup>; UV (MeOH)  $\lambda_{\text{max}}$  (log  $\epsilon$ ) 211 (4.02), 272 (3.81) nm; <sup>1</sup>H NMR (CDCl<sub>3</sub>, 400 MHz)  $\delta$  in ppm: 8.71 (2H, dd, *J* = 4.6, 1.4 Hz, 3'-H), 7.56 (2H, dd, *J* = 4.6, 1.4 Hz, 2'-H), 5.88 (2H, d, *J* = 18.2 Hz, OCH<sub>2</sub>O), 4.83 (1H, dd, *J* = 11.2, 3.2 Hz, 22-H<sub>α</sub>), 4.24 (1H, overlapped, 21-H), 4.20 (1H, dd, *J* = 11.2, 3.2 Hz, 22-H<sub>β</sub>), 4.07 (1H, d, *J* = 2.6 Hz, 11-H), 3.96 (1H, d, *J* = 3.2 Hz, 1-H), 3.80 (3H, s, 17-OCH<sub>3</sub>), 3.38 (1H, br d, *J* = 7.6 Hz, 13-H), 3.24 (1H, dt, *J* = 12.1, 2.6 Hz, 3-H), 2.89 (1H, dd, *J* = 15.1, 1.8 Hz, 4-H<sub>α</sub>), 2.70 (1H, dd, *J* = 20.8, 7.6 Hz, 14-H<sub>α</sub>), 2.29 (1H, dd, *J* = 20.8, 1.4 Hz, 14-H<sub>β</sub>), 2.26 (3H, s, NCH<sub>3</sub>), 2.16 (3H, s, 16-CH<sub>3</sub>), 1.79 (3H, s, 6-CH<sub>3</sub>), 1.55 (1H, dd, *J* = 15.1, 12.1 Hz, 4-H<sub>β</sub>); <sup>13</sup>C NMR (CDCl<sub>3</sub>, 100 MHz)  $\delta$  in ppm: 186.1 (C-15), 182.5 (C-18), 164.2 (C-24), 155.1 (C-17), 149.8 (2 × C-3'), 145.2 (C-20), 144.8 (C-8), 141.8 (C-5), 137.7 (C-1'), 136.8 (C-7), 135.3 (C-19), 128.6 (C-16), 123.1 (2 × C-2'), 117.2 (21-CN), 113.2 (C-6), 111.8 (C-9), 111.8 (C-10), 101.2 (OCH<sub>2</sub>O), 64.4 (C-22), 60.9 (17-OCH<sub>3</sub>), 59.2 (C-11), 56.9 (C-21), 56.1 (C-3), 54.7 (C-1), 54.7 (C-13), 41.4 (NCH<sub>3</sub>), 27.0 (C-4), 21.1 (C-14), 8.9 (6-CH<sub>3</sub>), 8.8 (16-CH<sub>3</sub>); HRESIMS *m/z* 599.2134 ([M+H]<sup>+</sup>, calculated for C<sub>32</sub>H<sub>31</sub>N<sub>4</sub>O<sub>8</sub>, 599.2136).

Photoreaction isonicotinoylF(2)  $^1\text{H}$ -NMR (400 MHz) in  $\text{CDCl}_3$ 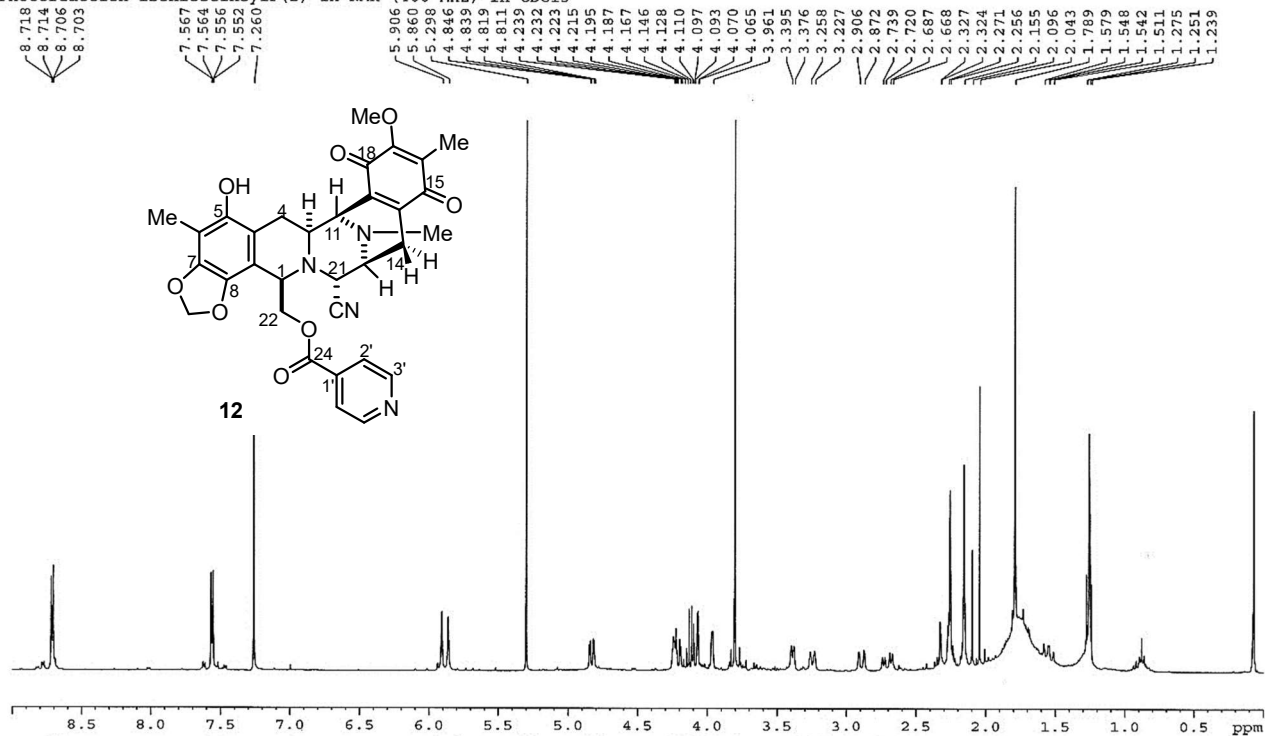Figure S11.  $^1\text{H}$  NMR (400 MHz) spectrum of **12** in  $\text{CDCl}_3$ Photoreaction isonicotinoylF(2)  $^{13}\text{C}$ -NMR (100 MHz) in  $\text{CDCl}_3$ 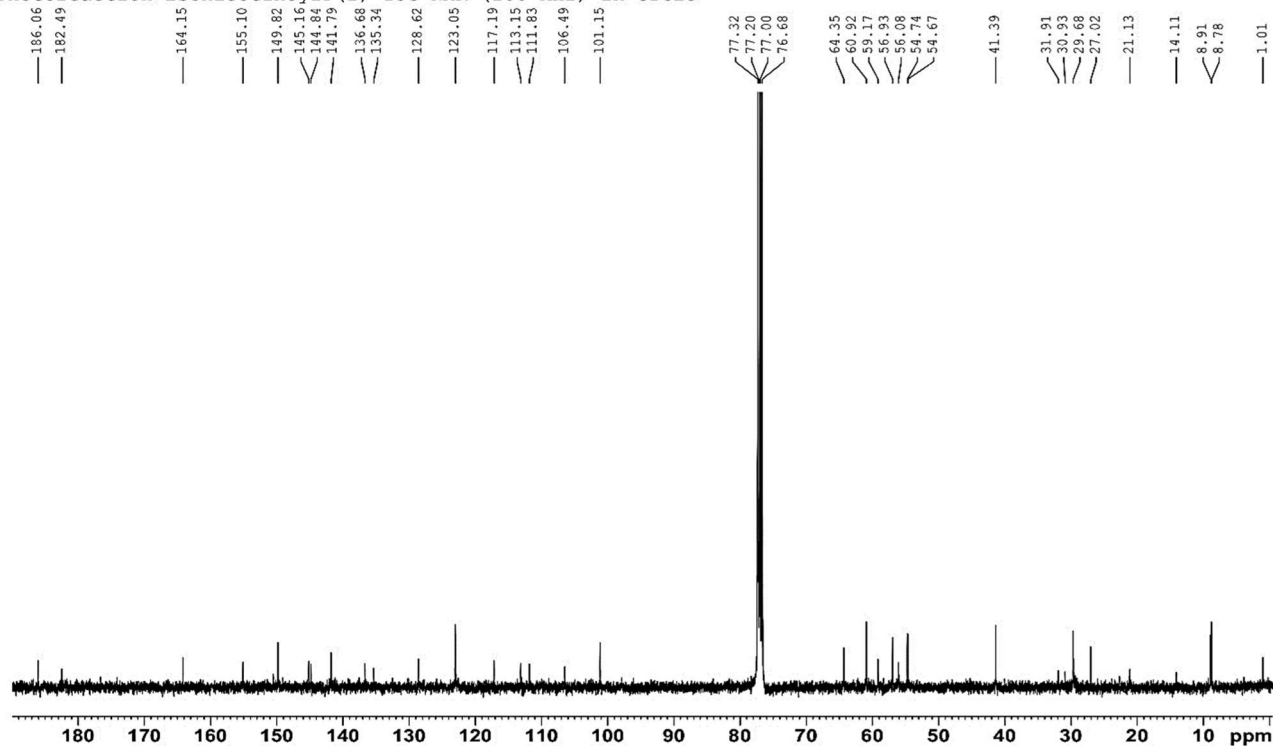Figure S12.  $^{13}\text{C}$  NMR (100 MHz) spectrum of **12** in  $\text{CDCl}_3$



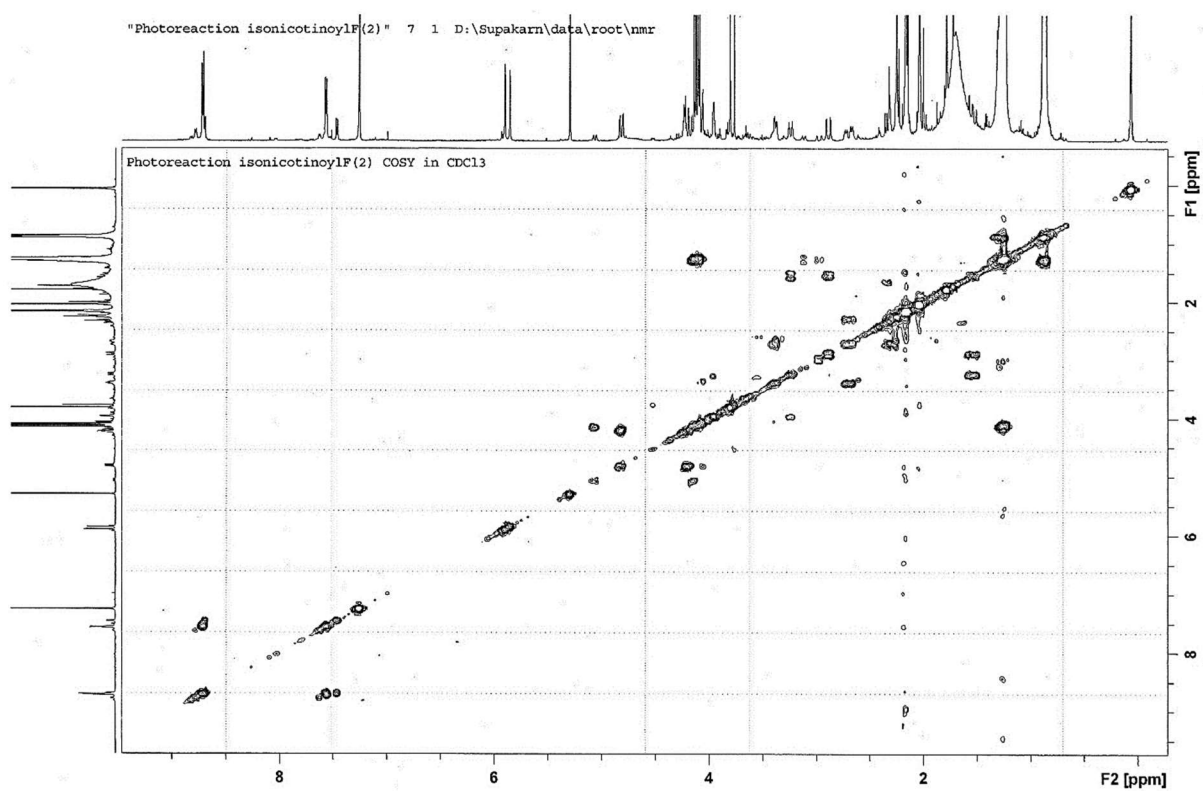

**Figure S13.** COSY (400 MHz) spectrum of **12** in CDCl<sub>3</sub>

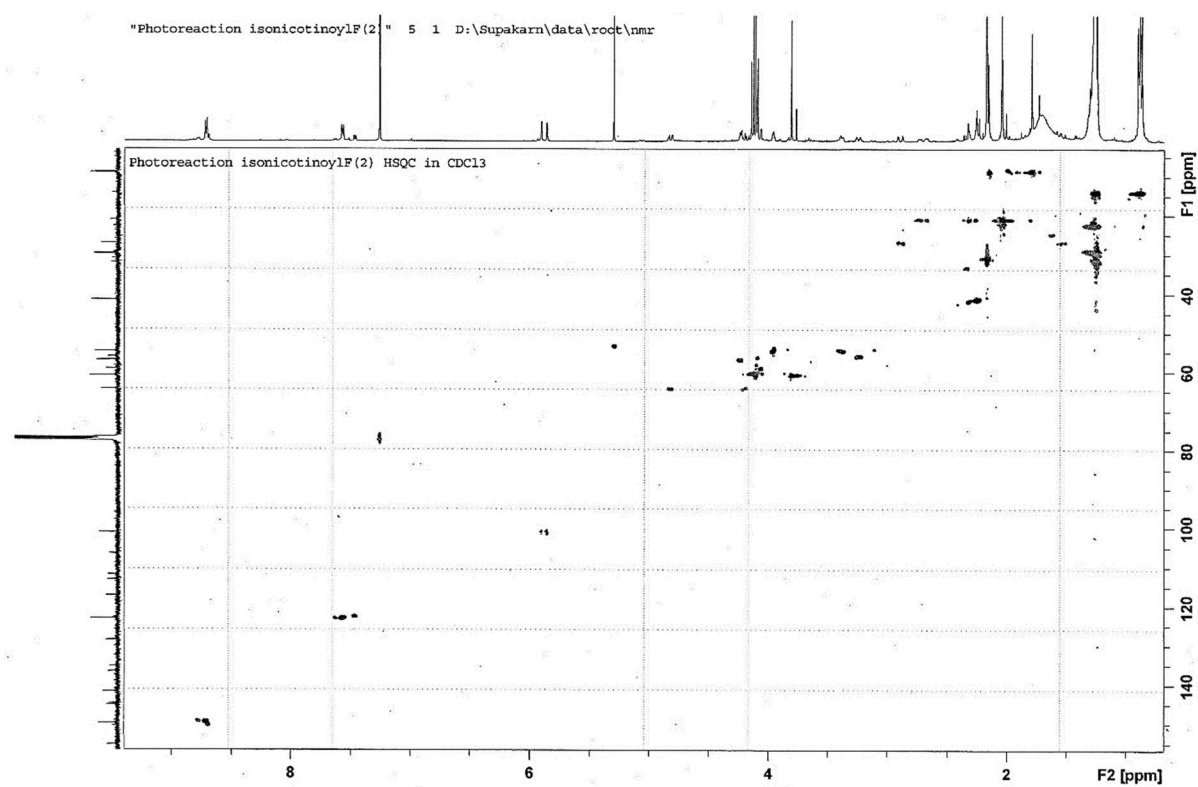

**Figure S14.** HSQC (400 MHz) spectrum of **12** in CDCl<sub>3</sub>

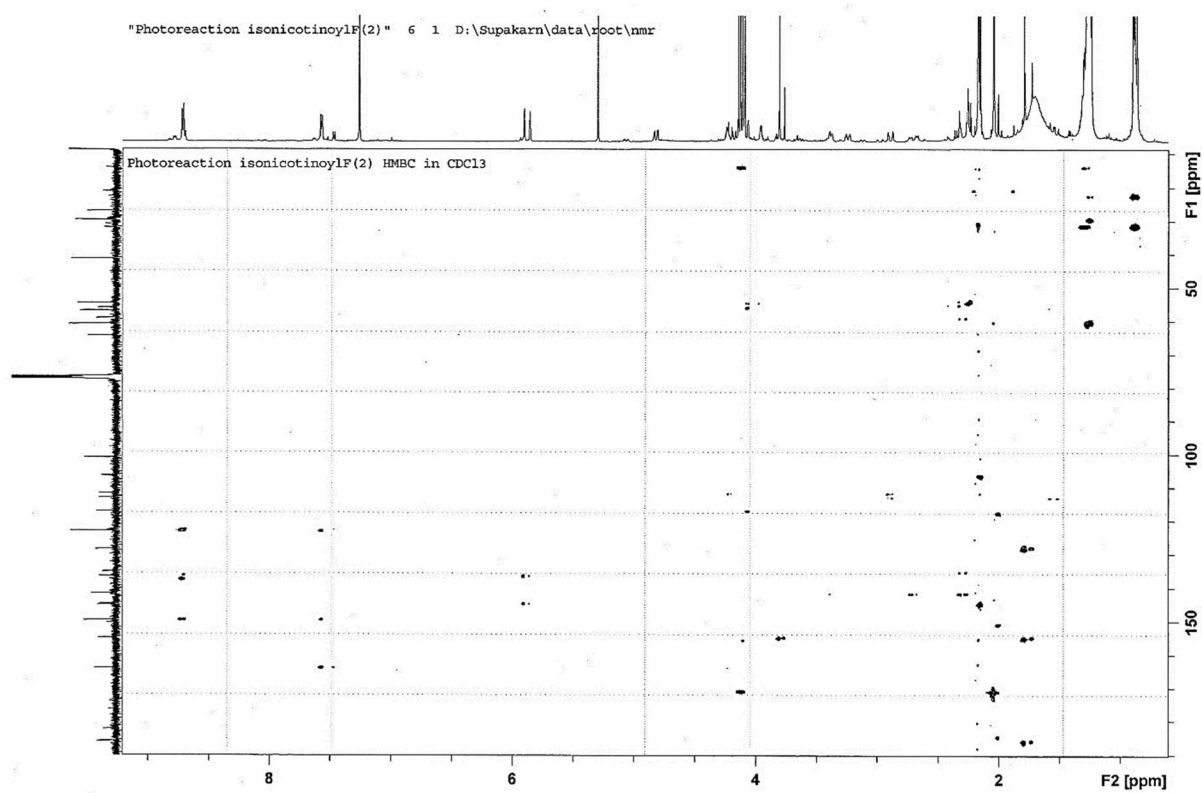

**Figure S15.** HMBC (400 MHz) spectrum of **12** in CDCl<sub>3</sub>

**Table S1.** Theoretical level of minimization of the 3D structures of **10**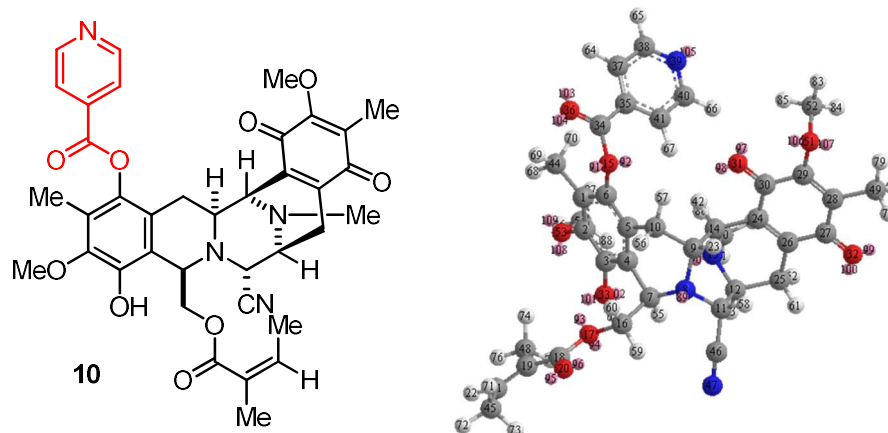

| Atom  | Atom Type (MM2) | Charge (MM2) | Charge (Huckel) | Bond lengths  |                |                 | Bond Angles           |                |                 | Dihedral angles           |                | Close contacts |                |
|-------|-----------------|--------------|-----------------|---------------|----------------|-----------------|-----------------------|----------------|-----------------|---------------------------|----------------|----------------|----------------|
|       |                 |              |                 | Atoms         | Actual (° / Å) | Optimal (° / Å) | Atoms                 | Actual (° / Å) | Optimal (° / Å) | Atoms                     | Actual (° / Å) | Atoms          | Actual (° / Å) |
| C(1)  | C Alkene        | 0            | -0.0800861      | O(53)-Lp(109) | 0.5955         | 0.6000          | H(85)-C(53)-H(84)     | 110.0456       | 109.0000        | C(29)-O(52)-C(53)-H(83)   | -178.7248      | Lp(109)-H(82)  | 1.9605         |
| C(2)  | C Alkene        | 0            | 0.166602        | O(53)-Lp(108) | 0.5999         | 0.6000          | H(85)-C(53)-H(83)     | 109.0366       | 109.0000        | C(29)-O(52)-C(53)-H(84)   | -59.6448       | C(28)-Lp(109)  | 2.2884         |
| C(3)  | C Alkene        | 0            | 0.138961        | O(51)-Lp(107) | 0.5972         | 0.6000          | H(85)-C(53)-O(52)     | 110.5144       | 106.7000        | C(29)-O(52)-C(53)-H(85)   | 62.0239        | C(30)-Lp(108)  | 2.2607         |
| C(4)  | C Alkene        | 0            | -0.037348       | O(51)-Lp(106) | 0.5987         | 0.6000          | H(84)-C(53)-H(83)     | 109.1725       | 109.0000        | Lp(108)-O(52)-C(53)-H(83) | 69.434         | C(26)-Lp(100)  | 2.2802         |
| C(5)  | C Alkene        | 0            | -0.0522545      | N(39)-Lp(105) | 0.6017         | 0.6000          | H(84)-C(53)-O(52)     | 109.9346       | 106.7000        | Lp(108)-O(52)-C(53)-H(84) | -171.486       | H(22)-H(73)    | 2.2664         |
| C(6)  | C Alkene        | 0            | 0.163587        | O(36)-Lp(104) | 0.6003         | 0.6000          | H(83)-C(53)-O(52)     | 108.0951       | 106.7000        | Lp(108)-O(52)-C(53)-H(85) | -49.8172       | C(24)-Lp(98)   | 2.2799         |
| C(7)  | C Alkene        | 0            | 0.0927996       | O(36)-Lp(103) | 0.5977         | 0.6000          | Lp(109)-O(52)-Lp(108) | 126.8037       | 131.0000        | Lp(109)-O(52)-C(53)-H(83) | -67.6846       | O(31)-O(52)    | 2.6397         |
| N(8)  | N Amine         | 0            | 0.418904        | O(33)-Lp(102) | 0.6005         | 0.6000          | Lp(109)-O(52)-C(53)   | 105.5050       | 105.3600        | Lp(109)-O(52)-C(53)-H(84) | 51.3954        | O(32)-C(51)    | 2.7037         |
| C(9)  | C Alkene        | 0            | 0.168202        | O(33)-Lp(101) | 0.5999         | 0.6000          | Lp(109)-O(52)-C(29)   | 101.8466       | 103.2600        | Lp(109)-O(52)-C(53)-H(85) | 173.0641       | C(25)-O(32)    | 2.7163         |
| C(10) | C Alkene        | 0            | -0.0732595      | O(32)-Lp(100) | 0.5990         | 0.6000          | Lp(108)-O(52)-C(53)   | 106.7526       | 105.3600        | C(2)-O(49)-C(50)-H(77)    | -179.33        | O(17)-C(45)    | 2.7276         |
| C(11) | C Alkene        | 0            | 0.11456         | O(32)-Lp(99)  | 0.5994         | 0.6000          | Lp(108)-O(52)-C(29)   | 101.8916       | 103.2600        | C(2)-O(49)-C(50)-H(78)    | -60.169        | H(42)-O(31)    | 2.4710         |
| C(12) | C Alkene        | 0            | 0.164665        | O(31)-Lp(98)  | 0.5978         | 0.6000          | C(53)-O(52)-C(29)     | 114.3011       | 110.8000        | C(2)-O(49)-C(50)-H(79)    | 61.426         | C(14)-O(31)    | 2.7185         |
| N(13) | N Amine         | 0            | 0.457761        | O(31)-Lp(97)  | 0.5992         | 0.6000          | H(82)-C(51)-H(81)     | 106.0029       | 109.0000        | Lp(106)-O(49)-C(50)-H(77) | 68.1522        | C(24)-C(28)    | 2.6947         |
| C(14) | C Alkene        | 0            | 0.151903        | O(20)-Lp(96)  | 0.5977         | 0.6000          | H(82)-C(51)-H(80)     | 106.2949       | 109.0000        | Lp(106)-O(49)-C(50)-H(78) | -172.6868      | H(42)-H(67)    | 2.0445         |
| O(15) | O Carboxyl      | 0            | -0.121838       | O(20)-Lp(95)  | 0.5956         | 0.6000          | H(82)-C(51)-C(28)     | 114.6502       | 110.0000        | Lp(106)-O(49)-C(50)-H(79) | -51.0918       | C(26)-C(29)    | 2.7080         |

| Atom  | Atom Type (MM2) | Charge (MM2) | Charge (Huckel) | Bond lengths |                |                 | Bond Angles          |                |                 | Dihedral angles           |                | Close contacts |                |
|-------|-----------------|--------------|-----------------|--------------|----------------|-----------------|----------------------|----------------|-----------------|---------------------------|----------------|----------------|----------------|
|       |                 |              |                 | Atoms        | Actual (° / Å) | Optimal (° / Å) | Atoms                | Actual (° / Å) | Optimal (° / Å) | Atoms                     | Actual (° / Å) | Atoms          | Actual (° / Å) |
| C(16) | C Alkane        | 0            | 0.203196        | O(17)-Lp(94) | 0.5995         | 0.6000          | H(81)-C(51)-H(80)    | 108.7651       | 109.0000        | Lp(107)-O(49)-C(50)-H(77) | -67.03         | C(30)-C(27)    | 2.7384         |
| O(17) | O Carbonyl      | 0            | -0.129563       | O(17)-Lp(93) | 0.5983         | 0.6000          | H(81)-C(51)-C(28)    | 110.4214       | 110.0000        | Lp(107)-O(49)-C(50)-H(78) | 52.131         | O(20)-C(21)    | 2.7767         |
| C(18) | C Carbonyl      | 0            | 0.548583        | O(15)-Lp(92) | 0.5941         | 0.6000          | H(80)-C(51)-C(28)    | 110.4344       | 110.0000        | Lp(107)-O(49)-C(50)-H(79) | 173.726        | C(16)-O(20)    | 2.6500         |
| C(19) | C Alkene        | 0            | -0.0102227      | O(15)-Lp(91) | 0.5973         | 0.6000          | Lp(100)-O(32)-Lp(99) | 123.7418       | 131.0000        | C(35)-C(41)-C(40)-N(39)   | -0.1503        | C(54)-H(42)    | 2.5408         |
| O(20) | O Carbonyl      | 0            | -0.663833       | N(13)-Lp(90) | 0.5996         | 0.6000          | Lp(100)-O(32)-C(27)  | 118.0222       | 120.0000        | C(35)-C(41)-C(40)-H(66)   | 179.8452       | C(47)-H(43)    | 2.5382         |
| C(21) | C Alkene        | 0            | 0.044475        | N(8)-Lp(89)  | 0.6002         | 0.6000          | Lp(99)-O(32)-C(27)   | 118.2357       | 120.0000        | H(67)-C(41)-C(40)-N(39)   | -179.9451      | C(25)-H(58)    | 2.5108         |
| H(22) | H               | 0            | 0.0216876       | C(54)-H(88)  | 1.1127         | 1.1110          | H(76)-C(46)-H(75)    | 106.3649       | 109.0000        | H(67)-C(41)-C(40)-H(66)   | 0.0504         | C(37)-C(40)    | 2.5989         |
| H(23) | H               | 0            | 0.0180569       | C(54)-H(87)  | 1.1130         | 1.1110          | H(76)-C(46)-H(74)    | 110.4109       | 109.0000        | C(41)-C(40)-N(39)-C(38)   | 0.0975         | C(35)-N(39)    | 2.7143         |
| C(24) | C Alkene        | 0            | -0.0439434      | C(54)-H(86)  | 1.1128         | 1.1110          | H(76)-C(46)-C(21)    | 111.4032       | 110.0000        | C(41)-C(40)-N(39)-Lp(105) | -179.9026      | C(35)-Lp(103)  | 2.2817         |
| C(25) | C Alkane        | 0            | -0.0240229      | O(53)-C(54)  | 1.4104         | 1.3960          | H(75)-C(46)-H(74)    | 106.6518       | 109.0000        | H(66)-C(40)-N(39)-C(38)   | -179.8981      | C(38)-C(41)    | 2.5909         |
| C(26) | C Alkene        | 0            | -0.11643        | C(52)-H(85)  | 1.1123         | 1.1110          | H(75)-C(46)-C(21)    | 110.6109       | 110.0000        | H(66)-C(40)-N(39)-Lp(105) | 0.1017         | N(13)-C(26)    | 2.8086         |
| C(27) | C Carbonyl      | 0            | 0.174341        | C(52)-H(84)  | 1.1129         | 1.1110          | H(74)-C(46)-C(21)    | 111.1847       | 110.0000        | C(40)-N(39)-C(38)-C(37)   | 0.0045         | N(8)-N(13)     | 2.6081         |
| C(28) | C Alkene        | 0            | -0.12622        | C(52)-H(83)  | 1.1127         | 1.1110          | H(73)-C(45)-H(72)    | 106.5662       | 109.0000        | C(40)-N(39)-C(38)-H(65)   | -179.9846      | C(24)-C(12)    | 2.8103         |
| C(29) | C Alkene        | 0            | 0.130624        | O(51)-C(52)  | 1.4102         | 1.3960          | H(73)-C(45)-H(71)    | 106.5799       | 109.0000        | Lp(105)-N(39)-C(38)-C(37) | -179.9954      | H(55)-C(47)    | 2.5943         |
| C(30) | C Carbonyl      | 0            | 0.13768         | C(50)-H(82)  | 1.1118         | 1.1130          | H(73)-C(45)-C(19)    | 113.3953       | 110.0000        | Lp(105)-N(39)-C(38)-H(65) | 0.0155         | O(36)-C(37)    | 2.6995         |
| O(31) | O Carbonyl      | 0            | -0.924738       | C(50)-H(81)  | 1.1139         | 1.1130          | H(72)-C(45)-H(71)    | 109.0033       | 109.0000        | C(35)-C(37)-C(38)-N(39)   | -0.0516        | Lp(91)-O(36)   | 2.1315         |
| O(32) | O Carbonyl      | 0            | -0.923221       | C(50)-H(80)  | 1.1148         | 1.1130          | H(72)-C(45)-C(19)    | 110.5941       | 110.0000        | C(35)-C(37)-C(38)-H(65)   | 179.9371       | H(69)-O(36)    | 2.4295         |
| O(33) | O Enol          | 0            | -0.309786       | C(49)-H(79)  | 1.1104         | 1.1130          | H(71)-C(45)-C(19)    | 110.4970       | 110.0000        | H(64)-C(37)-C(38)-N(39)   | -179.9503      | H(23)-C(24)    | 2.4963         |
| C(34) | C Carbonyl      | 0            | 0.607333        | C(49)-H(78)  | 1.1140         | 1.1130          | Lp(98)-O(31)-Lp(97)  | 123.4265       | 131.0000        | H(64)-C(37)-C(38)-H(65)   | 0.0384         | O(15)-H(57)    | 2.3913         |
| C(35) | C Alkene        | 0            | 0.0342873       | C(49)-H(77)  | 1.1140         | 1.1130          | Lp(98)-O(31)-C(30)   | 118.1628       | 120.0000        | C(34)-C(35)-C(41)-C(40)   | -179.8635      | C(11)-H(55)    | 2.4376         |
| O(36) | O Carbonyl      | 0            | -0.643808       | C(48)-H(76)  | 1.1124         | 1.1130          | Lp(97)-O(31)-C(30)   | 118.4012       | 120.0000        | C(34)-C(35)-C(41)-H(67)   | -0.0772        | O(33)-H(55)    | 2.4415         |
| C(37) | C Alkene        | 0            | -0.037284       | C(48)-H(75)  | 1.1138         | 1.1130          | C(51)-C(28)-C(29)    | 121.3685       | 121.4000        | C(37)-C(35)-C(41)-C(40)   | 0.0933         | C(11)-C(14)    | 2.7434         |
| C(38) | C Alkene        | 0            | 0.124564        | C(48)-H(74)  | 1.1140         | 1.1130          | C(51)-C(28)-C(27)    | 117.2622       | 120.0000        | C(37)-C(35)-C(41)-H(67)   | 179.8797       | C(44)-C(34)    | 2.8209         |
| N(39) | N Pyridine      | 0            | -0.182561       | C(46)-N(47)  | 1.1585         | 1.1580          | C(29)-C(28)-C(27)    | 121.3694       | 117.6000        | C(38)-C(37)-C(35)-C(34)   | 179.9551       | C(4)-C(9)      | 2.7295         |
| C(40) | C Alkene        | 0            | 0.125022        | C(45)-H(73)  | 1.1133         | 1.1130          | O(52)-C(29)-C(30)    | 117.8559       | 120.0000        | C(38)-C(37)-C(35)-C(41)   | -0.0012        | Lp(107)-H(68)  | 1.8690         |
| C(41) | C Alkene        | 0            | -0.0395701      | C(45)-H(72)  | 1.1141         | 1.1130          | O(52)-C(29)-C(28)    | 121.8246       | 124.3000        | H(64)-C(37)-C(35)-C(34)   | -0.1514        | O(49)-H(68)    | 2.4053         |
| H(42) | H               | 0            | 0.0236254       | C(45)-H(71)  | 1.1135         | 1.1130          | C(30)-C(29)-C(28)    | 119.9209       | 117.6000        | H(64)-C(37)-C(35)-C(41)   | 179.8923       | C(7)-C(10)     | 2.7981         |
| H(43) | H               | 0            | 0.0155556       | C(44)-H(70)  | 1.1123         | 1.1130          | O(32)-C(27)-C(28)    | 121.1945       | 123.0000        | O(15)-C(34)-O(36)-Lp(103) | 179.3177       | C(3)-Lp(106)   | 2.2535         |
| C(44) | C Alkane        | 0            | -0.141806       | C(44)-H(69)  | 1.1114         | 1.1130          | O(32)-C(27)-C(26)    | 120.5132       | 123.0000        | O(15)-C(34)-O(36)-Lp(104) | -1.5393        | C(2)-C(5)      | 2.6687         |
| C(45) | C Alkane        | 0            | -0.129619       | C(44)-H(68)  | 1.1094         | 1.1130          | C(28)-C(27)-C(26)    | 118.2913       | 115.0000        | C(35)-C(34)-O(36)-Lp(103) | 1.4988         | C(3)-C(6)      | 2.7225         |

| Atom  | Atom Type (MM2) | Charge (MM2) | Charge (Huckel) | Bond lengths |                |                 | Bond Angles         |                |                 | Dihedral angles           |                | Close contacts |                |
|-------|-----------------|--------------|-----------------|--------------|----------------|-----------------|---------------------|----------------|-----------------|---------------------------|----------------|----------------|----------------|
|       |                 |              |                 | Atoms        | Actual (° / Å) | Optimal (° / Å) | Atoms               | Actual (° / Å) | Optimal (° / Å) | Atoms                     | Actual (° / Å) | Atoms          | Actual (° / Å) |
| C(46) | C Alkane        | 0            | -0.135871       | C(41)-H(67)  | 1.0968         | 1.1000          | C(46)-C(21)-H(22)   | 113.6026       | 118.2000        | C(35)-C(34)-O(36)-Lp(104) | -179.3582      | C(1)-C(4)      | 2.7037         |
| C(47) | C Alkyne        | 0            | 0.36012         | C(40)-H(66)  | 1.1037         | 1.1000          | C(46)-C(21)-C(19)   | 129.0800       | 122.0000        | O(15)-C(34)-C(35)-C(37)   | -179.679       |                |                |
| N(48) | N Nitrile       | 0            | -0.441919       | C(41)-C(40)  | 1.3425         | 1.4200          | H(22)-C(21)-C(19)   | 117.3173       | 120.0000        | O(15)-C(34)-C(35)-C(41)   | 0.2749         |                |                |
| O(49) | O Enol          | 0            | -0.283353       | C(40)-N(39)  | 1.2648         | 1.3580          | Lp(96)-O(20)-Lp(95) | 123.5611       | 131.0000        | O(36)-C(34)-C(35)-C(37)   | -1.9662        |                |                |
| C(50) | C Alkane        | 0            | 0.0896958       | C(38)-H(65)  | 1.1036         | 1.1000          | Lp(96)-O(20)-C(18)  | 117.3617       | 120.0000        | O(36)-C(34)-C(35)-C(41)   | 177.9878       |                |                |
| C(51) | C Alkane        | 0            | -0.136662       | N(39)-C(38)  | 1.2652         | 1.3580          | Lp(95)-O(20)-C(18)  | 119.0760       | 120.0000        | C(24)-C(30)-O(31)-Lp(97)  | -178.7315      |                |                |
| O(52) | O Enol          | 0            | -0.277353       | C(37)-H(64)  | 1.1019         | 1.1000          | H(88)-C(54)-H(87)   | 108.5548       | 109.0000        | C(24)-C(30)-O(31)-Lp(98)  | 0.19           |                |                |
| C(53) | C Alkane        | 0            | 0.0879094       | C(37)-C(38)  | 1.3437         | 1.4200          | H(88)-C(54)-H(86)   | 107.2818       | 109.0000        | C(29)-C(30)-O(31)-Lp(97)  | 0.7099         |                |                |
| C(54) | C Alkane        | 0            | -0.0284995      | C(35)-C(41)  | 1.3449         | 1.4200          | H(88)-C(54)-N(13)   | 113.3756       |                 | C(29)-C(30)-O(31)-Lp(98)  | 179.6314       |                |                |
| H(55) | H               | 0            | 0.0381096       | C(37)-C(35)  | 1.3473         | 1.4200          | H(87)-C(54)-H(86)   | 106.4505       | 109.0000        | C(28)-C(29)-O(52)-C(53)   | 99.8236        |                |                |
| H(56) | H               | 0            | 0.038633        | C(34)-O(36)  | 1.2190         | 1.2080          | H(87)-C(54)-N(13)   | 110.6841       |                 | C(28)-C(29)-O(52)-Lp(108) | -145.4502      |                |                |
| H(57) | H               | 0            | 0.0268922       | C(34)-C(35)  | 1.3691         | 1.5170          | H(86)-C(54)-N(13)   | 110.2031       |                 | C(28)-C(29)-O(52)-Lp(109) | -13.4056       |                |                |
| H(58) | H               | 0            | 0.0479723       | O(33)-H(63)  | 0.9693         | 0.9720          | H(66)-C(40)-C(41)   | 119.9229       | 120.0000        | C(30)-C(29)-O(52)-C(53)   | -87.4331       |                |                |
| H(59) | H               | 0            | 0.0138719       | C(30)-O(31)  | 1.2165         | 1.2080          | H(66)-C(40)-N(39)   | 116.2227       | 116.5000        | C(30)-C(29)-O(52)-Lp(108) | 27.2931        |                |                |
| H(60) | H               | 0            | 0.01352         | C(29)-O(51)  | 1.3763         | 1.3550          | C(41)-C(40)-N(39)   | 123.8543       | 123.5000        | C(30)-C(29)-O(52)-Lp(109) | 159.3377       |                |                |
| H(61) | H               | 0            | 0.0335808       | C(29)-C(30)  | 1.3646         | 1.5170          | Lp(105)-N(39)-C(40) | 121.3108       | 122.5000        | C(28)-C(29)-C(30)-C(24)   | -2.4505        |                |                |
| H(62) | H               | 0            | 0.0393661       | C(28)-C(49)  | 1.5184         | 1.4970          | Lp(105)-N(39)-C(38) | 121.4950       | 122.5000        | C(28)-C(29)-C(30)-O(31)   | 178.1001       |                |                |
| H(63) | H Enol          | 0            | 0.210837        | C(28)-C(29)  | 1.3488         | 1.3370          | C(40)-N(39)-C(38)   | 117.1942       | 115.0000        | O(52)-C(29)-C(30)-C(24)   | -175.3373      |                |                |
| H(64) | H               | 0            | 0.0187534       | C(27)-O(32)  | 1.2157         | 1.2080          | O(31)-C(30)-C(29)   | 120.8784       | 123.0000        | O(52)-C(29)-C(30)-O(31)   | 5.2133         |                |                |
| H(65) | H               | 0            | -0.00433347     | C(27)-C(28)  | 1.3606         | 1.5170          | O(31)-C(30)-C(24)   | 120.2926       | 123.0000        | C(27)-C(28)-C(51)-H(80)   | -60.321        |                |                |
| H(66) | H               | 0            | -0.00460296     | C(26)-C(27)  | 1.3601         | 1.5170          | C(29)-C(30)-C(24)   | 118.8267       | 115.0000        | C(27)-C(28)-C(51)-H(81)   | 60.0126        |                |                |
| H(67) | H               | 0            | 0.023311        | C(25)-H(62)  | 1.1156         | 1.1130          | H(62)-C(25)-H(61)   | 106.3367       | 109.4000        | C(27)-C(28)-C(51)-H(82)   | 179.6512       |                |                |
| H(68) | H               | 0            | 0.0419097       | C(25)-H(61)  | 1.1152         | 1.1130          | H(62)-C(25)-C(26)   | 108.4254       | 109.4100        | C(29)-C(28)-C(51)-H(80)   | 119.7177       |                |                |
| H(69) | H               | 0            | 0.0488858       | C(26)-C(25)  | 1.5185         | 1.4970          | H(62)-C(25)-C(12)   | 110.1046       | 109.4100        | C(29)-C(28)-C(51)-H(81)   | -119.9487      |                |                |
| H(70) | H               | 0            | 0.0527083       | C(30)-C(24)  | 1.3619         | 1.5170          | H(61)-C(25)-C(26)   | 111.0137       | 109.4100        | C(29)-C(28)-C(51)-H(82)   | -0.3101        |                |                |
| H(71) | H               | 0            | 0.0493752       | C(24)-C(26)  | 1.3458         | 1.3370          | H(61)-C(25)-C(12)   | 108.4988       | 109.4100        | C(27)-C(28)-C(29)-C(30)   | 2.6962         |                |                |
| H(72) | H               | 0            | 0.0492713       | C(21)-C(45)  | 1.5069         | 1.4970          | C(26)-C(25)-C(12)   | 112.2937       | 109.5000        | C(27)-C(28)-C(29)-O(52)   | 175.2929       |                |                |
| H(73) | H               | 0            | 0.036735        | C(21)-H(22)  | 1.1049         | 1.1000          | C(45)-C(19)-C(21)   | 118.8202       | 121.4000        | C(51)-C(28)-C(29)-C(30)   | -177.344       |                |                |
| H(74) | H               | 0            | 0.0589382       | C(19)-C(48)  | 1.5176         | 1.4970          | C(45)-C(19)-C(18)   | 117.0340       | 120.0000        | C(51)-C(28)-C(29)-O(52)   | -4.7473        |                |                |
| H(75) | H               | 0            | 0.0425854       | C(19)-C(21)  | 1.3483         | 1.3370          | C(21)-C(19)-C(18)   | 124.1456       | 117.6000        | C(26)-C(27)-O(32)-Lp(99)  | -179.8722      |                |                |

| Atom  | Atom Type (MM2) | Charge (MM2) | Charge (Huckel) | Bond lengths |                |                 | Bond Angles           |                |                 | Dihedral angles           |                | Close contacts |                |
|-------|-----------------|--------------|-----------------|--------------|----------------|-----------------|-----------------------|----------------|-----------------|---------------------------|----------------|----------------|----------------|
|       |                 |              |                 | Atoms        | Actual (° / Å) | Optimal (° / Å) | Atoms                 | Actual (° / Å) | Optimal (° / Å) | Atoms                     | Actual (° / Å) | Atoms          | Actual (° / Å) |
| H(76) | H               | 0            | 0.0576163       | C(18)-O(20)  | 1.2141         | 1.2080          | H(67)-C(41)-C(40)     | 118.2165       | 120.0000        | C(26)-C(27)-O(32)-Lp(100) | 0.3249         |                |                |
| H(77) | H               | 0            | 0.0283359       | C(18)-C(19)  | 1.3668         | 1.5170          | H(67)-C(41)-C(35)     | 122.1635       | 120.0000        | C(28)-C(27)-O(32)-Lp(99)  | -0.2405        |                |                |
| H(78) | H               | 0            | 0.0229532       | O(17)-C(18)  | 1.3765         | 1.3380          | C(40)-C(41)-C(35)     | 119.6197       |                 | C(28)-C(27)-O(32)-Lp(100) | 179.9566       |                |                |
| H(79) | H               | 0            | 0.0229268       | C(16)-H(60)  | 1.1146         | 1.1110          | H(65)-C(38)-N(39)     | 115.8685       | 116.5000        | C(26)-C(27)-C(28)-C(29)   | -1.6251        |                |                |
| H(80) | H               | 0            | 0.0458539       | C(16)-H(59)  | 1.1146         | 1.1110          | H(65)-C(38)-C(37)     | 119.9121       | 120.0000        | C(26)-C(27)-C(28)-C(51)   | 178.4136       |                |                |
| H(81) | H               | 0            | 0.0463508       | C(16)-O(17)  | 1.4030         | 1.3890          | N(39)-C(38)-C(37)     | 124.2194       | 123.5000        | O(32)-C(27)-C(28)-C(29)   | 178.7353       |                |                |
| H(82) | H               | 0            | 0.0380449       | O(15)-C(34)  | 1.3755         | 1.3380          | C(27)-C(26)-C(25)     | 118.4647       | 120.0000        | O(32)-C(27)-C(28)-C(51)   | -1.2261        |                |                |
| H(83) | H               | 0            | 0.0284207       | C(14)-H(42)  | 1.1122         | 1.1130          | C(27)-C(26)-C(24)     | 120.8140       | 117.6000        | C(24)-C(26)-C(27)-C(28)   | 0.3617         |                |                |
| H(84) | H               | 0            | 0.0230242       | C(14)-C(24)  | 1.5272         | 1.4970          | C(25)-C(26)-C(24)     | 120.7189       | 121.4000        | C(24)-C(26)-C(27)-O(32)   | -179.9961      |                |                |
| H(85) | H               | 0            | 0.0233932       | N(13)-C(50)  | 1.4536         | 1.4380          | O(20)-C(18)-C(19)     | 122.4555       | 123.0000        | C(25)-C(26)-C(27)-C(28)   | 179.8171       |                |                |
| H(86) | H               | 0            | 0.0381677       | N(13)-C(14)  | 1.4521         | 1.4380          | O(20)-C(18)-O(17)     | 118.5593       | 122.0000        | C(25)-C(26)-C(27)-O(32)   | -0.5407        |                |                |
| H(87) | H               | 0            | 0.0345729       | C(12)-H(43)  | 1.1185         | 1.1130          | C(19)-C(18)-O(17)     | 118.9821       | 124.3000        | C(24)-C(26)-C(25)-C(12)   | -9.7656        |                |                |
| H(88) | H               | 0            | 0.0443887       | C(12)-C(25)  | 1.5375         | 1.5230          | Lp(90)-N(13)-C(54)    | 106.5115       | 109.2000        | C(24)-C(26)-C(25)-H(61)   | -131.4235      |                |                |
|       |                 |              |                 | C(12)-N(13)  | 1.4506         | 1.4380          | Lp(90)-N(13)-C(14)    | 107.0368       | 109.2000        | C(24)-C(26)-C(25)-H(62)   | 112.1163       |                |                |
|       |                 |              |                 | C(11)-H(58)  | 1.1189         | 1.1130          | Lp(90)-N(13)-C(12)    | 106.7567       | 109.2000        | C(27)-C(26)-C(25)-C(12)   | 170.7784       |                |                |
|       |                 |              |                 | C(11)-C(46)  | 1.4804         | 1.4700          | C(54)-N(13)-C(14)     | 113.4248       | 107.7000        | C(27)-C(26)-C(25)-H(61)   | 49.1206        |                |                |
|       |                 |              |                 | C(11)-C(12)  | 1.5511         | 1.5230          | C(54)-N(13)-C(12)     | 114.7038       | 107.7000        | C(27)-C(26)-C(25)-H(62)   | -67.3397       |                |                |
|       |                 |              |                 | C(10)-H(57)  | 1.1128         | 1.1130          | C(14)-N(13)-C(12)     | 107.9309       | 107.7000        | C(29)-C(30)-C(24)-C(14)   | -178.9026      |                |                |
|       |                 |              |                 | C(10)-H(56)  | 1.1146         | 1.1130          | H(43)-C(12)-C(25)     | 109.3471       | 109.3900        | C(29)-C(30)-C(24)-C(26)   | 1.2241         |                |                |
|       |                 |              |                 | C(9)-H(23)   | 1.1210         | 1.1130          | H(43)-C(12)-N(13)     | 108.4808       | 108.8000        | O(31)-C(30)-C(24)-C(14)   | 0.5501         |                |                |
|       |                 |              |                 | C(14)-C(9)   | 1.5526         | 1.5230          | H(43)-C(12)-C(11)     | 108.1542       | 109.3900        | O(31)-C(30)-C(24)-C(26)   | -179.3231      |                |                |
|       |                 |              |                 | C(9)-C(10)   | 1.5371         | 1.5230          | C(25)-C(12)-N(13)     | 110.1992       | 108.8000        | C(14)-C(24)-C(26)-C(25)   | 0.4965         |                |                |
|       |                 |              |                 | N(8)-C(11)   | 1.4617         | 1.4380          | C(25)-C(12)-C(11)     | 110.7442       | 109.5100        | C(14)-C(24)-C(26)-C(27)   | 179.9396       |                |                |
|       |                 |              |                 | N(8)-C(9)    | 1.4537         | 1.4380          | N(13)-C(12)-C(11)     | 109.8578       | 108.8000        | C(30)-C(24)-C(26)-C(25)   | -179.6333      |                |                |
|       |                 |              |                 | C(7)-H(55)   | 1.1158         | 1.1130          | N(48)-C(47)-C(11)     | 178.1155       | 180.0000        | C(30)-C(24)-C(26)-C(27)   | -0.1902        |                |                |
|       |                 |              |                 | C(7)-C(16)   | 1.5403         | 1.5140          | H(64)-C(37)-C(38)     | 117.9898       | 120.0000        | C(19)-C(21)-C(46)-H(74)   | 63.8802        |                |                |
|       |                 |              |                 | C(7)-N(8)    | 1.4683         | 1.4380          | H(64)-C(37)-C(35)     | 122.8753       | 120.0000        | C(19)-C(21)-C(46)-H(75)   | -177.8189      |                |                |
|       |                 |              |                 | C(6)-O(15)   | 1.3787         | 1.3550          | C(38)-C(37)-C(35)     | 119.1348       |                 | C(19)-C(21)-C(46)-H(76)   | -59.7371       |                |                |
|       |                 |              |                 | C(10)-C(5)   | 1.5104         | 1.4970          | Lp(104)-O(36)-Lp(103) | 123.7894       | 131.0000        | H(22)-C(21)-C(46)-H(74)   | -116.1076      |                |                |
|       |                 |              |                 | C(5)-C(6)    | 1.3527         | 1.4200          | Lp(104)-O(36)-C(34)   | 117.5487       | 120.0000        | H(22)-C(21)-C(46)-H(75)   | 2.1933         |                |                |

| Atom | Atom Type (MM2) | Charge (MM2) | Charge (Huckel) | Bond lengths |                |                 | Bond Angles         |                |                 | Dihedral angles          |                | Close contacts |                |
|------|-----------------|--------------|-----------------|--------------|----------------|-----------------|---------------------|----------------|-----------------|--------------------------|----------------|----------------|----------------|
|      |                 |              |                 | Atoms        | Actual (° / Å) | Optimal (° / Å) | Atoms               | Actual (° / Å) | Optimal (° / Å) | Atoms                    | Actual (° / Å) | Atoms          | Actual (° / Å) |
|      |                 |              |                 | C(4)-C(7)    | 1.5333         | 1.4970          | Lp(103)-O(36)-C(34) | 118.6559       | 120.0000        | H(22)-C(21)-C(46)-H(76)  | 120.2751       |                |                |
|      |                 |              |                 | C(4)-C(5)    | 1.3433         | 1.4200          | C(30)-C(24)-C(26)   | 120.7267       | 117.6000        | C(18)-C(19)-C(45)-H(71)  | -60.9331       |                |                |
|      |                 |              |                 | C(3)-O(33)   | 1.3636         | 1.3550          | C(30)-C(24)-C(14)   | 118.4333       | 120.0000        | C(18)-C(19)-C(45)-H(72)  | 59.8528        |                |                |
|      |                 |              |                 | C(3)-C(4)    | 1.3451         | 1.4200          | C(26)-C(24)-C(14)   | 120.8398       | 121.4000        | C(18)-C(19)-C(45)-H(73)  | 179.4855       |                |                |
|      |                 |              |                 | C(2)-O(53)   | 1.3760         | 1.3550          | Lp(94)-O(17)-Lp(93) | 127.2983       | 131.0000        | C(21)-C(19)-C(45)-H(71)  | 118.9232       |                |                |
|      |                 |              |                 | C(2)-C(3)    | 1.3481         | 1.4200          | Lp(94)-O(17)-C(18)  | 101.4449       | 105.1600        | C(21)-C(19)-C(45)-H(72)  | -120.2909      |                |                |
|      |                 |              |                 | C(1)-C(44)   | 1.5200         | 1.4970          | Lp(94)-O(17)-C(16)  | 105.0324       | 105.3600        | C(21)-C(19)-C(45)-H(73)  | -0.6582        |                |                |
|      |                 |              |                 | C(6)-C(1)    | 1.3555         | 1.4200          | Lp(93)-O(17)-C(18)  | 100.4284       | 105.1600        | C(18)-C(19)-C(21)-H(22)  | 179.6167       |                |                |
|      |                 |              |                 | C(1)-C(2)    | 1.3542         | 1.4200          | Lp(93)-O(17)-C(16)  | 104.7021       | 105.3600        | C(18)-C(19)-C(21)-C(46)  | -0.3707        |                |                |
|      |                 |              |                 |              |                |                 | C(18)-O(17)-C(16)   | 119.3773       | 109.9000        | C(45)-C(19)-C(21)-H(22)  | -0.2287        |                |                |
|      |                 |              |                 |              |                |                 | C(41)-C(35)-C(37)   | 115.9775       | 120.0000        | C(45)-C(19)-C(21)-C(46)  | 179.7839       |                |                |
|      |                 |              |                 |              |                |                 | C(41)-C(35)-C(34)   | 121.3891       | 117.6000        | O(17)-C(18)-O(20)-Lp(95) | 179.4551       |                |                |
|      |                 |              |                 |              |                |                 | C(37)-C(35)-C(34)   | 122.6334       | 117.6000        | O(17)-C(18)-O(20)-Lp(96) | -0.1607        |                |                |
|      |                 |              |                 |              |                |                 | H(60)-C(16)-H(59)   | 109.3496       | 109.4000        | C(19)-C(18)-O(20)-Lp(95) | 0.1086         |                |                |
|      |                 |              |                 |              |                |                 | H(60)-C(16)-O(17)   | 109.0893       | 106.7000        | C(19)-C(18)-O(20)-Lp(96) | -179.5073      |                |                |
|      |                 |              |                 |              |                |                 | H(60)-C(16)-C(7)    | 109.7169       | 109.4100        | O(17)-C(18)-C(19)-C(21)  | 179.7813       |                |                |
|      |                 |              |                 |              |                |                 | H(59)-C(16)-O(17)   | 108.7833       | 106.7000        | O(17)-C(18)-C(19)-C(45)  | -0.3708        |                |                |
|      |                 |              |                 |              |                |                 | H(59)-C(16)-C(7)    | 110.1011       | 109.4100        | O(20)-C(18)-C(19)-C(21)  | -0.8748        |                |                |
|      |                 |              |                 |              |                |                 | O(17)-C(16)-C(7)    | 109.7780       | 107.4000        | O(20)-C(18)-C(19)-C(45)  | 178.9731       |                |                |
|      |                 |              |                 |              |                |                 | H(42)-C(14)-C(24)   | 108.9196       | 109.3900        | C(16)-O(17)-C(18)-C(19)  | 178.0293       |                |                |
|      |                 |              |                 |              |                |                 | H(42)-C(14)-N(13)   | 105.7623       | 108.8000        | C(16)-O(17)-C(18)-O(20)  | -1.3404        |                |                |
|      |                 |              |                 |              |                |                 | H(42)-C(14)-C(9)    | 108.8444       | 109.3900        | Lp(93)-O(17)-C(18)-C(19) | 64.467         |                |                |
|      |                 |              |                 |              |                |                 | C(24)-C(14)-N(13)   | 111.5714       |                 | Lp(93)-O(17)-C(18)-O(20) | -114.9027      |                |                |
|      |                 |              |                 |              |                |                 | C(24)-C(14)-C(9)    | 111.7397       | 109.5100        | Lp(94)-O(17)-C(18)-C(19) | -67.2846       |                |                |
|      |                 |              |                 |              |                |                 | N(13)-C(14)-C(9)    | 109.7896       | 108.8000        | Lp(94)-O(17)-C(18)-O(20) | 113.3457       |                |                |
|      |                 |              |                 |              |                |                 | H(58)-C(11)-C(47)   | 102.9669       | 109.3900        | C(7)-C(16)-O(17)-C(18)   | -179.1467      |                |                |
|      |                 |              |                 |              |                |                 | H(58)-C(11)-C(12)   | 109.4016       | 109.3900        | C(7)-C(16)-O(17)-Lp(93)  | -67.8954       |                |                |
|      |                 |              |                 |              |                |                 | H(58)-C(11)-N(8)    | 107.0304       | 108.8000        | C(7)-C(16)-O(17)-Lp(94)  | 68.088         |                |                |
|      |                 |              |                 |              |                |                 | C(47)-C(11)-C(12)   | 113.6814       | 112.4000        | H(59)-C(16)-O(17)-C(18)  | 60.3184        |                |                |
|      |                 |              |                 |              |                |                 | C(47)-C(11)-N(8)    | 110.8003       |                 | H(59)-C(16)-O(17)-Lp(93) | 171.5696       |                |                |

| Atom | Atom Type (MM2) | Charge (MM2) | Charge (Huckel) | Bond lengths |                |                 | Bond Angles         |                |                 | Dihedral angles          |                | Close contacts |                |
|------|-----------------|--------------|-----------------|--------------|----------------|-----------------|---------------------|----------------|-----------------|--------------------------|----------------|----------------|----------------|
|      |                 |              |                 | Atoms        | Actual (° / Å) | Optimal (° / Å) | Atoms               | Actual (° / Å) | Optimal (° / Å) | Atoms                    | Actual (° / Å) | Atoms          | Actual (° / Å) |
|      |                 |              |                 |              |                |                 | C(12)-C(11)-N(8)    | 112.3287       | 108.8000        | H(59)-C(16)-O(17)-Lp(94) | -52.4469       |                |                |
|      |                 |              |                 |              |                |                 | O(36)-C(34)-C(35)   | 119.6266       | 123.0000        | H(60)-C(16)-O(17)-C(18)  | -58.8931       |                |                |
|      |                 |              |                 |              |                |                 | O(36)-C(34)-O(15)   | 117.8316       | 122.0000        | H(60)-C(16)-O(17)-Lp(93) | 52.3581        |                |                |
|      |                 |              |                 |              |                |                 | C(35)-C(34)-O(15)   | 122.5040       | 124.3000        | H(60)-C(16)-O(17)-Lp(94) | -171.6584      |                |                |
|      |                 |              |                 |              |                |                 | H(23)-C(9)-C(14)    | 108.0865       | 109.3900        | C(6)-O(15)-C(34)-C(35)   | -73.941        |                |                |
|      |                 |              |                 |              |                |                 | H(23)-C(9)-C(10)    | 105.7636       | 109.3900        | C(6)-O(15)-C(34)-O(36)   | 108.3072       |                |                |
|      |                 |              |                 |              |                |                 | H(23)-C(9)-N(8)     | 107.3092       | 108.8000        | Lp(91)-O(15)-C(34)-C(35) | 171.5894       |                |                |
|      |                 |              |                 |              |                |                 | C(14)-C(9)-C(10)    | 114.2759       | 109.5100        | Lp(91)-O(15)-C(34)-O(36) | -6.1624        |                |                |
|      |                 |              |                 |              |                |                 | C(14)-C(9)-N(8)     | 111.9680       | 108.8000        | Lp(92)-O(15)-C(34)-C(35) | 38.1815        |                |                |
|      |                 |              |                 |              |                |                 | C(10)-C(9)-N(8)     | 109.0236       | 108.8000        | Lp(92)-O(15)-C(34)-O(36) | -139.5703      |                |                |
|      |                 |              |                 |              |                |                 | Lp(89)-N(8)-C(11)   | 105.6448       | 109.2000        | C(9)-C(14)-C(24)-C(26)   | 98.7861        |                |                |
|      |                 |              |                 |              |                |                 | Lp(89)-N(8)-C(9)    | 106.9324       | 109.2000        | C(9)-C(14)-C(24)-C(30)   | -81.087        |                |                |
|      |                 |              |                 |              |                |                 | Lp(89)-N(8)-C(7)    | 106.4109       | 109.2000        | N(13)-C(14)-C(24)-C(26)  | -24.5527       |                |                |
|      |                 |              |                 |              |                |                 | C(11)-N(8)-C(9)     | 108.2697       | 107.7000        | N(13)-C(14)-C(24)-C(30)  | 155.5741       |                |                |
|      |                 |              |                 |              |                |                 | C(11)-N(8)-C(7)     | 114.0919       | 107.7000        | H(42)-C(14)-C(24)-C(26)  | -140.9313      |                |                |
|      |                 |              |                 |              |                |                 | C(9)-N(8)-C(7)      | 114.8360       | 107.7000        | H(42)-C(14)-C(24)-C(30)  | 39.1956        |                |                |
|      |                 |              |                 |              |                |                 | Lp(92)-O(15)-Lp(91) | 129.2738       | 131.0000        | C(12)-N(13)-C(54)-H(86)  | 170.6067       |                |                |
|      |                 |              |                 |              |                |                 | Lp(92)-O(15)-C(34)  | 98.4347        | 105.1600        | C(12)-N(13)-C(54)-H(87)  | 53.1241        |                |                |
|      |                 |              |                 |              |                |                 | Lp(92)-O(15)-C(6)   | 103.4755       | 103.2600        | C(12)-N(13)-C(54)-H(88)  | -69.1344       |                |                |
|      |                 |              |                 |              |                |                 | Lp(91)-O(15)-C(34)  | 102.2757       | 105.1600        | C(14)-N(13)-C(54)-H(86)  | -64.7385       |                |                |
|      |                 |              |                 |              |                |                 | Lp(91)-O(15)-C(6)   | 102.9592       | 103.2600        | C(14)-N(13)-C(54)-H(87)  | 177.7789       |                |                |
|      |                 |              |                 |              |                |                 | C(34)-O(15)-C(6)    | 122.9118       | 112.0000        | C(14)-N(13)-C(54)-H(88)  | 55.5205        |                |                |
|      |                 |              |                 |              |                |                 | H(57)-C(10)-H(56)   | 106.8490       | 109.4000        | Lp(90)-N(13)-C(54)-H(86) | 52.7431        |                |                |
|      |                 |              |                 |              |                |                 | H(57)-C(10)-C(9)    | 107.8930       | 109.4100        | Lp(90)-N(13)-C(54)-H(87) | -64.7394       |                |                |
|      |                 |              |                 |              |                |                 | H(57)-C(10)-C(5)    | 113.5442       | 109.4100        | Lp(90)-N(13)-C(54)-H(88) | 173.0021       |                |                |
|      |                 |              |                 |              |                |                 | H(56)-C(10)-C(9)    | 111.5287       | 109.4100        | C(12)-N(13)-C(14)-C(9)   | -66.4203       |                |                |
|      |                 |              |                 |              |                |                 | H(56)-C(10)-C(5)    | 109.5317       | 109.4100        | C(12)-N(13)-C(14)-C(24)  | 58.0193        |                |                |
|      |                 |              |                 |              |                |                 | C(9)-C(10)-C(5)     | 107.5430       | 109.5000        | C(12)-N(13)-C(14)-H(42)  | 176.3056       |                |                |
|      |                 |              |                 |              |                |                 | H(55)-C(7)-C(16)    | 107.6119       | 109.3900        | C(54)-N(13)-C(14)-C(9)   | 165.3429       |                |                |
|      |                 |              |                 |              |                |                 | H(55)-C(7)-N(8)     | 108.5449       | 108.8000        | C(54)-N(13)-C(14)-C(24)  | -70.2174       |                |                |



| Atom | Atom Type (MM2) | Charge (MM2) | Charge (Huckel) | Bond lengths |                |                 | Bond Angles           |                |                 | Dihedral angles          |                | Close contacts |                |
|------|-----------------|--------------|-----------------|--------------|----------------|-----------------|-----------------------|----------------|-----------------|--------------------------|----------------|----------------|----------------|
|      |                 |              |                 | Atoms        | Actual (° / Å) | Optimal (° / Å) | Atoms                 | Actual (° / Å) | Optimal (° / Å) | Atoms                    | Actual (° / Å) | Atoms          | Actual (° / Å) |
|      |                 |              |                 |              |                |                 | H(55)-C(7)-C(4)       | 108.3537       | 109.3900        | C(54)-N(13)-C(14)-H(42)  | 48.0689        |                |                |
|      |                 |              |                 |              |                |                 | C(16)-C(7)-N(8)       | 107.9726       | 108.8000        | Lp(90)-N(13)-C(14)-C(9)  | 48.1677        |                |                |
|      |                 |              |                 |              |                |                 | C(16)-C(7)-C(4)       | 109.0499       | 109.5100        | Lp(90)-N(13)-C(14)-C(24) | 172.6074       |                |                |
|      |                 |              |                 |              |                |                 | N(8)-C(7)-C(4)        | 115.0709       |                 | Lp(90)-N(13)-C(14)-H(42) | -69.1063       |                |                |
|      |                 |              |                 |              |                |                 | H(79)-C(50)-H(78)     | 110.0859       | 109.0000        | C(11)-C(12)-C(25)-C(26)  | -78.2481       |                |                |
|      |                 |              |                 |              |                |                 | H(79)-C(50)-H(77)     | 109.1173       | 109.0000        | C(11)-C(12)-C(25)-H(61)  | 44.8348        |                |                |
|      |                 |              |                 |              |                |                 | H(79)-C(50)-O(49)     | 110.2486       | 106.7000        | C(11)-C(12)-C(25)-H(62)  | 160.8314       |                |                |
|      |                 |              |                 |              |                |                 | H(78)-C(50)-H(77)     | 109.1627       | 109.0000        | N(13)-C(12)-C(25)-C(26)  | 43.5134        |                |                |
|      |                 |              |                 |              |                |                 | H(78)-C(50)-O(49)     | 110.0106       | 106.7000        | N(13)-C(12)-C(25)-H(61)  | 166.5963       |                |                |
|      |                 |              |                 |              |                |                 | H(77)-C(50)-O(49)     | 108.1769       | 106.7000        | N(13)-C(12)-C(25)-H(62)  | -77.407        |                |                |
|      |                 |              |                 |              |                |                 | H(70)-C(44)-H(69)     | 111.1933       | 109.0000        | H(43)-C(12)-C(25)-C(26)  | 162.6672       |                |                |
|      |                 |              |                 |              |                |                 | H(70)-C(44)-H(68)     | 105.4055       | 109.0000        | H(43)-C(12)-C(25)-H(61)  | -74.2499       |                |                |
|      |                 |              |                 |              |                |                 | H(70)-C(44)-C(1)      | 111.1351       | 110.0000        | H(43)-C(12)-C(25)-H(62)  | 41.7468        |                |                |
|      |                 |              |                 |              |                |                 | H(69)-C(44)-H(68)     | 102.7009       | 109.0000        | C(11)-C(12)-N(13)-C(14)  | 53.6538        |                |                |
|      |                 |              |                 |              |                |                 | H(69)-C(44)-C(1)      | 110.6619       | 110.0000        | C(11)-C(12)-N(13)-C(54)  | -178.844       |                |                |
|      |                 |              |                 |              |                |                 | H(68)-C(44)-C(1)      | 115.3769       | 110.0000        | C(11)-C(12)-N(13)-Lp(90) | -61.1194       |                |                |
|      |                 |              |                 |              |                |                 | Lp(102)-O(33)-Lp(101) | 113.3897       |                 | C(25)-C(12)-N(13)-C(14)  | -68.6321       |                |                |
|      |                 |              |                 |              |                |                 | Lp(102)-O(33)-H(63)   | 103.5395       | 101.1000        | C(25)-C(12)-N(13)-C(54)  | 58.8701        |                |                |
|      |                 |              |                 |              |                |                 | Lp(102)-O(33)-C(3)    | 111.9647       |                 | C(25)-C(12)-N(13)-Lp(90) | 176.5947       |                |                |
|      |                 |              |                 |              |                |                 | Lp(101)-O(33)-H(63)   | 103.3889       | 101.1000        | H(43)-C(12)-N(13)-C(14)  | 171.6877       |                |                |
|      |                 |              |                 |              |                |                 | Lp(101)-O(33)-C(3)    | 113.5660       |                 | H(43)-C(12)-N(13)-C(54)  | -60.8101       |                |                |
|      |                 |              |                 |              |                |                 | H(63)-O(33)-C(3)      | 110.1014       | 108.0000        | H(43)-C(12)-N(13)-Lp(90) | 56.9144        |                |                |
|      |                 |              |                 |              |                |                 | C(10)-C(5)-C(6)       | 121.3008       | 121.4000        | N(8)-C(11)-C(47)-N(48)   | 76.2967        |                |                |
|      |                 |              |                 |              |                |                 | C(10)-C(5)-C(4)       | 115.7968       | 121.4000        | C(12)-C(11)-C(47)-N(48)  | -51.3204       |                |                |
|      |                 |              |                 |              |                |                 | C(6)-C(5)-C(4)        | 122.8873       | 120.0000        | H(58)-C(11)-C(47)-N(48)  | -169.5634      |                |                |
|      |                 |              |                 |              |                |                 | Lp(107)-O(49)-Lp(106) | 126.2385       | 131.0000        | N(8)-C(11)-C(12)-N(13)   | 9.0828         |                |                |
|      |                 |              |                 |              |                |                 | Lp(107)-O(49)-C(50)   | 105.0307       | 105.3600        | N(8)-C(11)-C(12)-C(25)   | 131.0446       |                |                |
|      |                 |              |                 |              |                |                 | Lp(107)-O(49)-C(2)    | 103.4342       | 103.2600        | N(8)-C(11)-C(12)-H(43)   | -109.1533      |                |                |
|      |                 |              |                 |              |                |                 | Lp(106)-O(49)-C(50)   | 105.4621       | 105.3600        | C(47)-C(11)-C(12)-N(13)  | 135.9046       |                |                |
|      |                 |              |                 |              |                |                 | Lp(106)-O(49)-C(2)    | 103.4056       | 103.2600        | C(47)-C(11)-C(12)-C(25)  | -102.1336      |                |                |

| Atom | Atom Type (MM2) | Charge (MM2) | Charge (Huckel) | Bond lengths |                |                 | Bond Angles      |                |                 | Dihedral angles         |                | Close contacts |                |
|------|-----------------|--------------|-----------------|--------------|----------------|-----------------|------------------|----------------|-----------------|-------------------------|----------------|----------------|----------------|
|      |                 |              |                 | Atoms        | Actual (° / Å) | Optimal (° / Å) | Atoms            | Actual (° / Å) | Optimal (° / Å) | Atoms                   | Actual (° / Å) | Atoms          | Actual (° / Å) |
|      |                 |              |                 |              |                |                 | C(50)-O(49)-C(2) | 113.5506       | 110.8000        | C(47)-C(11)-C(12)-H(43) | 17.6685        |                |                |
|      |                 |              |                 |              |                |                 | O(15)-C(6)-C(5)  | 116.4474       | 124.3000        | H(58)-C(11)-C(12)-N(13) | -109.6242      |                |                |
|      |                 |              |                 |              |                |                 | O(15)-C(6)-C(1)  | 126.2836       | 124.3000        | H(58)-C(11)-C(12)-C(25) | 12.3376        |                |                |
|      |                 |              |                 |              |                |                 | C(5)-C(6)-C(1)   | 117.2381       | 120.0000        | H(58)-C(11)-C(12)-H(43) | 132.1397       |                |                |
|      |                 |              |                 |              |                |                 | C(7)-C(4)-C(5)   | 121.1592       | 121.4000        | N(13)-C(14)-C(9)-N(8)   | 13.6166        |                |                |
|      |                 |              |                 |              |                |                 | C(7)-C(4)-C(3)   | 120.2558       | 121.4000        | N(13)-C(14)-C(9)-C(10)  | -110.9594      |                |                |
|      |                 |              |                 |              |                |                 | C(5)-C(4)-C(3)   | 118.5718       | 120.0000        | N(13)-C(14)-C(9)-H(23)  | 131.6013       |                |                |
|      |                 |              |                 |              |                |                 | O(33)-C(3)-C(4)  | 120.6080       | 124.3000        | C(24)-C(14)-C(9)-N(8)   | -110.7255      |                |                |
|      |                 |              |                 |              |                |                 | O(33)-C(3)-C(2)  | 119.0365       | 124.3000        | C(24)-C(14)-C(9)-C(10)  | 124.6986       |                |                |
|      |                 |              |                 |              |                |                 | C(4)-C(3)-C(2)   | 120.3364       | 120.0000        | C(24)-C(14)-C(9)-H(23)  | 7.2593         |                |                |
|      |                 |              |                 |              |                |                 | O(49)-C(2)-C(3)  | 117.8435       | 124.3000        | H(42)-C(14)-C(9)-N(8)   | 128.9478       |                |                |
|      |                 |              |                 |              |                |                 | O(49)-C(2)-C(1)  | 121.8185       | 124.3000        | H(42)-C(14)-C(9)-C(10)  | 4.3719         |                |                |
|      |                 |              |                 |              |                |                 | C(3)-C(2)-C(1)   | 119.9088       | 120.0000        | H(42)-C(14)-C(9)-H(23)  | -113.0674      |                |                |
|      |                 |              |                 |              |                |                 | C(44)-C(1)-C(6)  | 121.3702       | 121.4000        | N(8)-C(9)-C(10)-C(5)    | -67.6031       |                |                |
|      |                 |              |                 |              |                |                 | C(44)-C(1)-C(2)  | 117.8885       | 121.4000        | N(8)-C(9)-C(10)-H(56)   | 52.5054        |                |                |
|      |                 |              |                 |              |                |                 | C(6)-C(1)-C(2)   | 120.7408       | 120.0000        | N(8)-C(9)-C(10)-H(57)   | 169.5567       |                |                |
|      |                 |              |                 |              |                |                 |                  |                |                 | C(14)-C(9)-C(10)-C(5)   | 58.5245        |                |                |
|      |                 |              |                 |              |                |                 |                  |                |                 | C(14)-C(9)-C(10)-H(56)  | 178.6331       |                |                |
|      |                 |              |                 |              |                |                 |                  |                |                 | C(14)-C(9)-C(10)-H(57)  | -64.3156       |                |                |
|      |                 |              |                 |              |                |                 |                  |                |                 | H(23)-C(9)-C(10)-C(5)   | 177.2877       |                |                |
|      |                 |              |                 |              |                |                 |                  |                |                 | H(23)-C(9)-C(10)-H(56)  | -62.6038       |                |                |
|      |                 |              |                 |              |                |                 |                  |                |                 | H(23)-C(9)-C(10)-H(57)  | 54.4475        |                |                |
|      |                 |              |                 |              |                |                 |                  |                |                 | C(7)-N(8)-C(11)-C(12)   | 68.602         |                |                |
|      |                 |              |                 |              |                |                 |                  |                |                 | C(7)-N(8)-C(11)-C(47)   | -59.7506       |                |                |
|      |                 |              |                 |              |                |                 |                  |                |                 | C(7)-N(8)-C(11)-H(58)   | -171.3059      |                |                |
|      |                 |              |                 |              |                |                 |                  |                |                 | C(9)-N(8)-C(11)-C(12)   | -60.6065       |                |                |
|      |                 |              |                 |              |                |                 |                  |                |                 | C(9)-N(8)-C(11)-C(47)   | 171.0409       |                |                |
|      |                 |              |                 |              |                |                 |                  |                |                 | C(9)-N(8)-C(11)-H(58)   | 59.4856        |                |                |
|      |                 |              |                 |              |                |                 |                  |                |                 | Lp(89)-N(8)-C(11)-C(12) | -174.8714      |                |                |
|      |                 |              |                 |              |                |                 |                  |                |                 | Lp(89)-N(8)-C(11)-C(47) | 56.776         |                |                |

| Atom | Atom Type<br>(MM2) | Charge<br>(MM2) | Charge<br>(Huckel) | Bond lengths |                   |                    | Bond Angles |                   |                    | Dihedral angles         |                   | Close contacts |                   |
|------|--------------------|-----------------|--------------------|--------------|-------------------|--------------------|-------------|-------------------|--------------------|-------------------------|-------------------|----------------|-------------------|
|      |                    |                 |                    | Atoms        | Actual<br>(° / Å) | Optimal<br>(° / Å) | Atoms       | Actual<br>(° / Å) | Optimal<br>(° / Å) | Atoms                   | Actual<br>(° / Å) | Atoms          | Actual<br>(° / Å) |
|      |                    |                 |                    |              |                   |                    |             |                   |                    | Lp(89)-N(8)-C(11)-H(58) | -54.7793          |                |                   |
|      |                    |                 |                    |              |                   |                    |             |                   |                    | C(7)-N(8)-C(9)-C(10)    | 46.4097           |                |                   |
|      |                    |                 |                    |              |                   |                    |             |                   |                    | C(7)-N(8)-C(9)-C(14)    | -81.036           |                |                   |
|      |                    |                 |                    |              |                   |                    |             |                   |                    | C(7)-N(8)-C(9)-H(23)    | 160.5169          |                |                   |
|      |                    |                 |                    |              |                   |                    |             |                   |                    | C(11)-N(8)-C(9)-C(10)   | 175.2001          |                |                   |
|      |                    |                 |                    |              |                   |                    |             |                   |                    | C(11)-N(8)-C(9)-C(14)   | 47.7544           |                |                   |
|      |                    |                 |                    |              |                   |                    |             |                   |                    | C(11)-N(8)-C(9)-H(23)   | -70.6927          |                |                   |
|      |                    |                 |                    |              |                   |                    |             |                   |                    | Lp(89)-N(8)-C(9)-C(10)  | -71.3865          |                |                   |
|      |                    |                 |                    |              |                   |                    |             |                   |                    | Lp(89)-N(8)-C(9)-C(14)  | 161.1678          |                |                   |
|      |                    |                 |                    |              |                   |                    |             |                   |                    | Lp(89)-N(8)-C(9)-H(23)  | 42.7207           |                |                   |
|      |                    |                 |                    |              |                   |                    |             |                   |                    | C(4)-C(7)-C(16)-O(17)   | 58.5583           |                |                   |
|      |                    |                 |                    |              |                   |                    |             |                   |                    | C(4)-C(7)-C(16)-H(59)   | 178.2919          |                |                   |
|      |                    |                 |                    |              |                   |                    |             |                   |                    | C(4)-C(7)-C(16)-H(60)   | -61.3134          |                |                   |
|      |                    |                 |                    |              |                   |                    |             |                   |                    | N(8)-C(7)-C(16)-O(17)   | -175.7589         |                |                   |
|      |                    |                 |                    |              |                   |                    |             |                   |                    | N(8)-C(7)-C(16)-H(59)   | -56.0252          |                |                   |
|      |                    |                 |                    |              |                   |                    |             |                   |                    | N(8)-C(7)-C(16)-H(60)   | 64.3695           |                |                   |
|      |                    |                 |                    |              |                   |                    |             |                   |                    | H(55)-C(7)-C(16)-O(17)  | -58.7723          |                |                   |
|      |                    |                 |                    |              |                   |                    |             |                   |                    | H(55)-C(7)-C(16)-H(59)  | 60.9614           |                |                   |
|      |                    |                 |                    |              |                   |                    |             |                   |                    | H(55)-C(7)-C(16)-H(60)  | -178.6439         |                |                   |
|      |                    |                 |                    |              |                   |                    |             |                   |                    | C(4)-C(7)-N(8)-C(9)     | -0.5118           |                |                   |
|      |                    |                 |                    |              |                   |                    |             |                   |                    | C(4)-C(7)-N(8)-C(11)    | -126.3398         |                |                   |
|      |                    |                 |                    |              |                   |                    |             |                   |                    | C(4)-C(7)-N(8)-Lp(89)   | 117.5788          |                |                   |
|      |                    |                 |                    |              |                   |                    |             |                   |                    | C(16)-C(7)-N(8)-C(9)    | -122.5564         |                |                   |
|      |                    |                 |                    |              |                   |                    |             |                   |                    | C(16)-C(7)-N(8)-C(11)   | 111.6156          |                |                   |
|      |                    |                 |                    |              |                   |                    |             |                   |                    | C(16)-C(7)-N(8)-Lp(89)  | -4.4658           |                |                   |
|      |                    |                 |                    |              |                   |                    |             |                   |                    | H(55)-C(7)-N(8)-C(9)    | 121.063           |                |                   |
|      |                    |                 |                    |              |                   |                    |             |                   |                    | H(55)-C(7)-N(8)-C(11)   | -4.7651           |                |                   |
|      |                    |                 |                    |              |                   |                    |             |                   |                    | H(55)-C(7)-N(8)-Lp(89)  | -120.8464         |                |                   |
|      |                    |                 |                    |              |                   |                    |             |                   |                    | C(1)-C(6)-O(15)-C(34)   | -25.5397          |                |                   |
|      |                    |                 |                    |              |                   |                    |             |                   |                    | C(1)-C(6)-O(15)-Lp(91)  | 88.5909           |                |                   |

| Atom | Atom Type<br>(MM2) | Charge<br>(MM2) | Charge<br>(Huckel) | Bond lengths |                   |                    | Bond Angles |                   |                    | Dihedral angles         |                   | Close contacts |                   |
|------|--------------------|-----------------|--------------------|--------------|-------------------|--------------------|-------------|-------------------|--------------------|-------------------------|-------------------|----------------|-------------------|
|      |                    |                 |                    | Atoms        | Actual<br>(° / Å) | Optimal<br>(° / Å) | Atoms       | Actual<br>(° / Å) | Optimal<br>(° / Å) | Atoms                   | Actual<br>(° / Å) | Atoms          | Actual<br>(° / Å) |
|      |                    |                 |                    |              |                   |                    |             |                   |                    | C(1)-C(6)-O(15)-Lp(92)  | -135.0978         |                |                   |
|      |                    |                 |                    |              |                   |                    |             |                   |                    | C(5)-C(6)-O(15)-C(34)   | 156.5472          |                |                   |
|      |                    |                 |                    |              |                   |                    |             |                   |                    | C(5)-C(6)-O(15)-Lp(91)  | -89.3222          |                |                   |
|      |                    |                 |                    |              |                   |                    |             |                   |                    | C(5)-C(6)-O(15)-Lp(92)  | 46.9891           |                |                   |
|      |                    |                 |                    |              |                   |                    |             |                   |                    | C(9)-C(10)-C(5)-C(4)    | 40.268            |                |                   |
|      |                    |                 |                    |              |                   |                    |             |                   |                    | C(9)-C(10)-C(5)-C(6)    | -138.3588         |                |                   |
|      |                    |                 |                    |              |                   |                    |             |                   |                    | H(56)-C(10)-C(5)-C(4)   | -81.0983          |                |                   |
|      |                    |                 |                    |              |                   |                    |             |                   |                    | H(56)-C(10)-C(5)-C(6)   | 100.2749          |                |                   |
|      |                    |                 |                    |              |                   |                    |             |                   |                    | H(57)-C(10)-C(5)-C(4)   | 159.5582          |                |                   |
|      |                    |                 |                    |              |                   |                    |             |                   |                    | H(57)-C(10)-C(5)-C(6)   | -19.0687          |                |                   |
|      |                    |                 |                    |              |                   |                    |             |                   |                    | C(4)-C(5)-C(6)-C(1)     | -0.629            |                |                   |
|      |                    |                 |                    |              |                   |                    |             |                   |                    | C(4)-C(5)-C(6)-O(15)    | 177.4791          |                |                   |
|      |                    |                 |                    |              |                   |                    |             |                   |                    | C(10)-C(5)-C(6)-C(1)    | 177.8988          |                |                   |
|      |                    |                 |                    |              |                   |                    |             |                   |                    | C(10)-C(5)-C(6)-O(15)   | -3.9932           |                |                   |
|      |                    |                 |                    |              |                   |                    |             |                   |                    | C(3)-C(4)-C(7)-N(8)     | 152.5327          |                |                   |
|      |                    |                 |                    |              |                   |                    |             |                   |                    | C(3)-C(4)-C(7)-C(16)    | -86.0055          |                |                   |
|      |                    |                 |                    |              |                   |                    |             |                   |                    | C(3)-C(4)-C(7)-H(55)    | 30.8544           |                |                   |
|      |                    |                 |                    |              |                   |                    |             |                   |                    | C(5)-C(4)-C(7)-N(8)     | -28.8081          |                |                   |
|      |                    |                 |                    |              |                   |                    |             |                   |                    | C(5)-C(4)-C(7)-C(16)    | 92.6537           |                |                   |
|      |                    |                 |                    |              |                   |                    |             |                   |                    | C(5)-C(4)-C(7)-H(55)    | -150.4864         |                |                   |
|      |                    |                 |                    |              |                   |                    |             |                   |                    | C(3)-C(4)-C(5)-C(6)     | 3.5057            |                |                   |
|      |                    |                 |                    |              |                   |                    |             |                   |                    | C(3)-C(4)-C(5)-C(10)    | -175.097          |                |                   |
|      |                    |                 |                    |              |                   |                    |             |                   |                    | C(7)-C(4)-C(5)-C(6)     | -175.1755         |                |                   |
|      |                    |                 |                    |              |                   |                    |             |                   |                    | C(7)-C(4)-C(5)-C(10)    | 6.2217            |                |                   |
|      |                    |                 |                    |              |                   |                    |             |                   |                    | C(2)-C(3)-O(33)-H(63)   | -161.3684         |                |                   |
|      |                    |                 |                    |              |                   |                    |             |                   |                    | C(2)-C(3)-O(33)-Lp(101) | -45.9867          |                |                   |
|      |                    |                 |                    |              |                   |                    |             |                   |                    | C(2)-C(3)-O(33)-Lp(102) | 84.0231           |                |                   |
|      |                    |                 |                    |              |                   |                    |             |                   |                    | C(4)-C(3)-O(33)-H(63)   | 17.044            |                |                   |
|      |                    |                 |                    |              |                   |                    |             |                   |                    | C(4)-C(3)-O(33)-Lp(101) | 132.4257          |                |                   |
|      |                    |                 |                    |              |                   |                    |             |                   |                    | C(4)-C(3)-O(33)-Lp(102) | -97.5645          |                |                   |

| Atom | Atom Type<br>(MM2) | Charge<br>(MM2) | Charge<br>(Huckel) | Bond lengths |                   |                    | Bond Angles |                   |                    | Dihedral angles         |                   | Close contacts |                   |
|------|--------------------|-----------------|--------------------|--------------|-------------------|--------------------|-------------|-------------------|--------------------|-------------------------|-------------------|----------------|-------------------|
|      |                    |                 |                    | Atoms        | Actual<br>(° / Å) | Optimal<br>(° / Å) | Atoms       | Actual<br>(° / Å) | Optimal<br>(° / Å) | Atoms                   | Actual<br>(° / Å) | Atoms          | Actual<br>(° / Å) |
|      |                    |                 |                    |              |                   |                    |             |                   |                    | C(2)-C(3)-C(4)-C(5)     | -1.3698           |                |                   |
|      |                    |                 |                    |              |                   |                    |             |                   |                    | C(2)-C(3)-C(4)-C(7)     | 177.3237          |                |                   |
|      |                    |                 |                    |              |                   |                    |             |                   |                    | O(33)-C(3)-C(4)-C(5)    | -179.7615         |                |                   |
|      |                    |                 |                    |              |                   |                    |             |                   |                    | O(33)-C(3)-C(4)-C(7)    | -1.068            |                |                   |
|      |                    |                 |                    |              |                   |                    |             |                   |                    | C(1)-C(2)-O(49)-C(50)   | 96.5443           |                |                   |
|      |                    |                 |                    |              |                   |                    |             |                   |                    | C(1)-C(2)-O(49)-Lp(106) | -149.6991         |                |                   |
|      |                    |                 |                    |              |                   |                    |             |                   |                    | C(1)-C(2)-O(49)-Lp(107) | -16.7199          |                |                   |
|      |                    |                 |                    |              |                   |                    |             |                   |                    | C(3)-C(2)-O(49)-C(50)   | -90.985           |                |                   |
|      |                    |                 |                    |              |                   |                    |             |                   |                    | C(3)-C(2)-O(49)-Lp(106) | 22.7716           |                |                   |
|      |                    |                 |                    |              |                   |                    |             |                   |                    | C(3)-C(2)-O(49)-Lp(107) | 155.7508          |                |                   |
|      |                    |                 |                    |              |                   |                    |             |                   |                    | C(1)-C(2)-C(3)-C(4)     | -3.5292           |                |                   |
|      |                    |                 |                    |              |                   |                    |             |                   |                    | C(1)-C(2)-C(3)-O(33)    | 174.8877          |                |                   |
|      |                    |                 |                    |              |                   |                    |             |                   |                    | O(49)-C(2)-C(3)-C(4)    | -176.1492         |                |                   |
|      |                    |                 |                    |              |                   |                    |             |                   |                    | O(49)-C(2)-C(3)-O(33)   | 2.2676            |                |                   |
|      |                    |                 |                    |              |                   |                    |             |                   |                    | C(2)-C(1)-C(44)-H(68)   | 13.833            |                |                   |
|      |                    |                 |                    |              |                   |                    |             |                   |                    | C(2)-C(1)-C(44)-H(69)   | 129.8697          |                |                   |
|      |                    |                 |                    |              |                   |                    |             |                   |                    | C(2)-C(1)-C(44)-H(70)   | -106.0737         |                |                   |
|      |                    |                 |                    |              |                   |                    |             |                   |                    | C(6)-C(1)-C(44)-H(68)   | -165.9045         |                |                   |
|      |                    |                 |                    |              |                   |                    |             |                   |                    | C(6)-C(1)-C(44)-H(69)   | -49.8678          |                |                   |
|      |                    |                 |                    |              |                   |                    |             |                   |                    | C(6)-C(1)-C(44)-H(70)   | 74.1888           |                |                   |
|      |                    |                 |                    |              |                   |                    |             |                   |                    | C(5)-C(6)-C(1)-C(2)     | -4.3976           |                |                   |
|      |                    |                 |                    |              |                   |                    |             |                   |                    | C(5)-C(6)-C(1)-C(44)    | 175.3325          |                |                   |
|      |                    |                 |                    |              |                   |                    |             |                   |                    | O(15)-C(6)-C(1)-C(2)    | 177.7039          |                |                   |
|      |                    |                 |                    |              |                   |                    |             |                   |                    | O(15)-C(6)-C(1)-C(44)   | -2.566            |                |                   |
|      |                    |                 |                    |              |                   |                    |             |                   |                    | C(6)-C(1)-C(2)-C(3)     | 6.513             |                |                   |
|      |                    |                 |                    |              |                   |                    |             |                   |                    | C(6)-C(1)-C(2)-O(49)    | 178.8317          |                |                   |
|      |                    |                 |                    |              |                   |                    |             |                   |                    | C(44)-C(1)-C(2)-C(3)    | -173.2262         |                |                   |
|      |                    |                 |                    |              |                   |                    |             |                   |                    | C(44)-C(1)-C(2)-O(49)   | -0.9076           |                |                   |

**Table S2.** Theoretical level of minimization of the 3D structures of **11**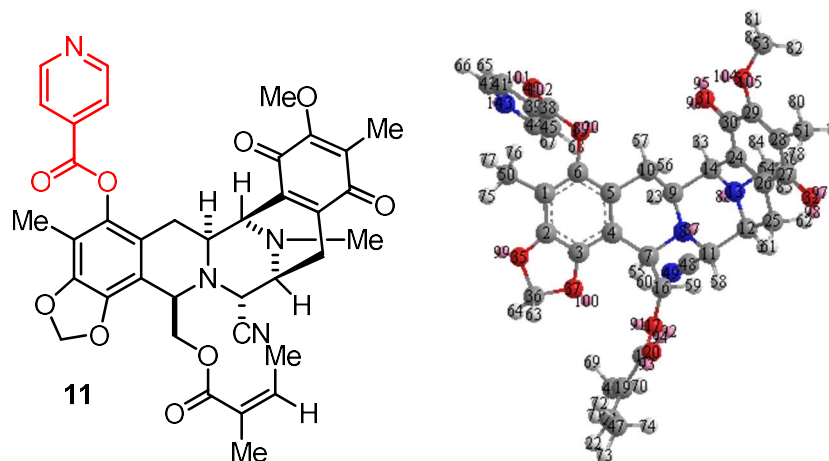

| Atom  | Atom Type (MM2) | Charge (MM2) | Charge (Huckel) | Bond lengths  |                |                 | Bond Angles           |                |                 | Dihedral angles           |                | Close contacts |                |
|-------|-----------------|--------------|-----------------|---------------|----------------|-----------------|-----------------------|----------------|-----------------|---------------------------|----------------|----------------|----------------|
|       |                 |              |                 | Atoms         | Actual (° / Å) | Optimal (° / Å) | Atoms                 | Actual (° / Å) | Optimal (° / Å) | Atoms                     | Actual (° / Å) | Atoms          | Actual (° / Å) |
| C(1)  | C Alkene        | 0            | -0.141775       | O(52)-Lp(105) | 0.5971         | 0.6000          | H(83)-C(53)-H(82)     | 110.0482       | 109.0000        | C(29)-O(52)-C(53)-H(81)   | -178.6821      | Lp(105)-H(80)  | 1.9599         |
| C(2)  | C Alkene        | 0            | 0.165611        | O(52)-Lp(104) | 0.5987         | 0.6000          | H(83)-C(53)-H(81)     | 109.0447       | 109.0000        | C(29)-O(52)-C(53)-H(82)   | -59.5872       | C(28)-Lp(105)  | 2.2855         |
| C(3)  | C Alkene        | 0            | 0.154807        | N(43)-Lp(103) | 0.6017         | 0.6000          | H(83)-C(53)-O(52)     | 110.4806       | 106.7000        | C(29)-O(52)-C(53)-H(83)   | 62.0800        | C(30)-Lp(104)  | 2.2619         |
| C(4)  | C Alkene        | 0            | -0.0953676      | O(40)-Lp(102) | 0.6002         | 0.6000          | H(82)-C(53)-H(81)     | 109.1751       | 109.0000        | Lp(104)-O(52)-C(53)-H(81) | 69.2809        | C(26)-Lp(98)   | 2.2829         |
| C(5)  | C Alkene        | 0            | -0.102308       | O(40)-Lp(101) | 0.5975         | 0.6000          | H(82)-C(53)-O(52)     | 109.9609       | 106.7000        | Lp(104)-O(52)-C(53)-H(82) | -171.6242      | H(22)-H(71)    | 2.2694         |
| C(6)  | C Alkene        | 0            | 0.145271        | O(37)-Lp(100) | 0.6002         | 0.6000          | H(81)-C(53)-O(52)     | 108.0895       | 106.7000        | Lp(104)-O(52)-C(53)-H(83) | -49.9570       | C(24)-Lp(96)   | 2.2863         |
| C(7)  | C Alkane        | 0            | 0.0701674       | O(35)-Lp(99)  | 0.6021         | 0.6000          | Lp(105)-O(52)-Lp(104) | 126.6872       | 131.0000        | Lp(105)-O(52)-C(53)-H(81) | -67.6968       | C(29)-Lp(95)   | 2.2840         |
| N(8)  | N Amine         | 0            | 0.347871        | O(32)-Lp(98)  | 0.5991         | 0.6000          | Lp(105)-O(52)-C(53)   | 105.4498       | 105.3600        | Lp(105)-O(52)-C(53)-H(82) | 51.3981        | O(31)-O(52)    | 2.6312         |
| C(9)  | C Alkane        | 0            | 0.126878        | O(32)-Lp(97)  | 0.5993         | 0.6000          | Lp(105)-O(52)-C(29)   | 101.8062       | 103.2600        | Lp(105)-O(52)-C(53)-H(83) | 173.0653       | O(32)-C(51)    | 2.7030         |
| C(10) | C Alkane        | 0            | -0.0810699      | O(31)-Lp(96)  | 0.5973         | 0.6000          | Lp(104)-O(52)-C(53)   | 106.8189       | 105.3600        | C(39)-C(45)-C(44)-N(43)   | -0.0016        | C(25)-O(32)    | 2.7096         |
| C(11) | C Alkane        | 0            | 0.111517        | O(31)-Lp(95)  | 0.5991         | 0.6000          | Lp(104)-O(52)-C(29)   | 101.9971       | 103.2600        | C(39)-C(45)-C(44)-H(67)   | 179.9507       | O(17)-C(46)    | 2.7244         |
| C(12) | C Alkane        | 0            | 0.15499         | O(20)-Lp(94)  | 0.5981         | 0.6000          | C(53)-O(52)-C(29)     | 114.3562       | 110.8000        | H(68)-C(45)-C(44)-N(43)   | -179.7173      | H(33)-O(31)    | 2.4572         |
| N(13) | N Amine         | 0            | 0.450068        | O(20)-Lp(93)  | 0.5956         | 0.6000          | H(80)-C(51)-H(79)     | 106.0292       | 109.0000        | H(68)-C(45)-C(44)-H(67)   | 0.2350         | C(14)-O(31)    | 2.7711         |
| C(14) | C Alkane        | 0            | 0.130466        | O(17)-Lp(92)  | 0.5993         | 0.6000          | H(80)-C(51)-H(78)     | 106.2458       | 109.0000        | C(45)-C(44)-N(43)-C(42)   | 0.1380         | C(24)-C(28)    | 2.6999         |
| O(15) | O Carboxyl      | 0            | -0.135328       | O(17)-Lp(91)  | 0.5958         | 0.6000          | H(80)-C(51)-C(28)     | 114.6760       | 110.0000        | C(45)-C(44)-N(43)-Lp(103) | -179.9445      | C(6)-H(68)     | 2.5919         |

| Atom  | Atom Type (MM2) | Charge (MM2) | Charge (Huckel) | Bond lengths |                |                 | Bond Angles         |                |                 | Dihedral angles           |                | Close contacts |                |
|-------|-----------------|--------------|-----------------|--------------|----------------|-----------------|---------------------|----------------|-----------------|---------------------------|----------------|----------------|----------------|
|       |                 |              |                 | Atoms        | Actual (° / Å) | Optimal (° / Å) | Atoms               | Actual (° / Å) | Optimal (° / Å) | Atoms                     | Actual (° / Å) | Atoms          | Actual (° / Å) |
| C(16) | C Alkane        | 0            | 0.156664        | O(15)-Lp(90) | 0.5933         | 0.6000          | H(79)-C(51)-H(78)   | 108.7737       | 109.0000        | H(67)-C(44)-N(43)-C(42)   | -179.8160      | C(26)-C(29)    | 2.7036         |
| O(17) | O Carboxyl      | 0            | -0.147843       | O(15)-Lp(89) | 0.5973         | 0.6000          | H(79)-C(51)-C(28)   | 110.4247       | 110.0000        | H(67)-C(44)-N(43)-Lp(103) | 0.1015         | C(30)-C(27)    | 2.7360         |
| C(18) | C Carbonyl      | 0            | 0.551039        | N(13)-Lp(88) | 0.6014         | 0.6000          | H(78)-C(51)-C(28)   | 110.4192       | 110.0000        | C(44)-N(43)-C(42)-C(41)   | -0.0927        | O(20)-C(21)    | 2.7780         |
| C(19) | C Alkene        | 0            | -0.0109144      | N(8)-Lp(87)  | 0.6007         | 0.6000          | Lp(98)-O(32)-Lp(97) | 123.6652       | 131.0000        | C(44)-N(43)-C(42)-H(66)   | 179.9612       | H(60)-O(20)    | 2.4376         |
| O(20) | O Carbonyl      | 0            | -0.66274        | C(54)-H(86)  | 1.1118         | 1.1130          | Lp(98)-O(32)-C(27)  | 118.0839       | 120.0000        | Lp(103)-N(43)-C(42)-C(41) | 179.9898       | C(16)-O(20)    | 2.6838         |
| C(21) | C Alkene        | 0            | 0.045386        | C(54)-H(85)  | 1.1141         | 1.1130          | Lp(97)-O(32)-C(27)  | 118.2507       | 120.0000        | Lp(103)-N(43)-C(42)-H(66) | 0.0438         | O(40)-H(65)    | 2.4759         |
| H(22) | H               | 0            | 0.0217088       | C(54)-H(84)  | 1.1141         | 1.1130          | H(74)-C(47)-H(73)   | 106.2398       | 109.0000        | C(39)-C(41)-C(42)-N(43)   | -0.0876        | C(41)-C(44)    | 2.5956         |
| H(23) | H               | 0            | 0.0406023       | C(53)-H(83)  | 1.1122         | 1.1110          | H(74)-C(47)-H(72)   | 110.4003       | 109.0000        | C(39)-C(41)-C(42)-H(66)   | 179.8563       | C(39)-N(43)    | 2.7151         |
| C(24) | C Alkene        | 0            | -0.0367738      | C(53)-H(82)  | 1.1129         | 1.1110          | H(74)-C(47)-C(21)   | 111.5457       | 110.0000        | H(65)-C(41)-C(42)-N(43)   | -179.8807      | C(39)-Lp(101)  | 2.2848         |
| C(25) | C Alkane        | 0            | -0.0240526      | C(53)-H(81)  | 1.1127         | 1.1110          | H(73)-C(47)-H(72)   | 106.8006       | 109.0000        | H(65)-C(41)-C(42)-H(66)   | 0.0633         | C(18)-H(60)    | 2.5498         |
| C(26) | C Alkene        | 0            | -0.0925668      | O(52)-C(53)  | 1.4100         | 1.3960          | H(73)-C(47)-C(21)   | 110.5940       | 110.0000        | C(38)-C(39)-C(45)-C(44)   | 179.9042       | C(4)-H(60)     | 2.5202         |
| C(27) | C Carbonyl      | 0            | 0.181202        | C(51)-H(80)  | 1.1104         | 1.1130          | H(72)-C(47)-C(21)   | 111.0473       | 110.0000        | C(38)-C(39)-C(45)-H(68)   | -0.3960        | N(8)-H(59)     | 2.4892         |
| C(28) | C Alkene        | 0            | -0.126983       | C(51)-H(79)  | 1.1140         | 1.1130          | H(71)-C(46)-H(70)   | 106.6175       | 109.0000        | C(41)-C(39)-C(45)-C(44)   | -0.1742        | C(42)-C(45)    | 2.5955         |
| C(29) | C Alkene        | 0            | 0.132764        | C(51)-H(78)  | 1.1140         | 1.1130          | H(71)-C(46)-H(69)   | 106.6803       | 109.0000        | C(41)-C(39)-C(45)-H(68)   | 179.5255       | N(13)-C(26)    | 2.8156         |
| C(30) | C Carbonyl      | 0            | 0.13943         | C(50)-H(77)  | 1.1129         | 1.1130          | H(71)-C(46)-C(19)   | 113.3386       | 110.0000        | C(42)-C(41)-C(39)-C(38)   | -179.8638      | C(24)-C(12)    | 2.8631         |
| O(31) | O Carbonyl      | 0            | -0.925735       | C(50)-H(76)  | 1.1122         | 1.1130          | H(70)-C(46)-H(69)   | 108.7513       | 109.0000        | C(42)-C(41)-C(39)-C(45)   | 0.2148         | C(9)-C(12)     | 2.8435         |
| O(32) | O Carbonyl      | 0            | -0.910527       | C(50)-H(75)  | 1.1119         | 1.1130          | H(70)-C(46)-C(19)   | 110.6851       | 110.0000        | H(65)-C(41)-C(39)-C(38)   | -0.0820        | H(55)-C(48)    | 2.4005         |
| H(33) | H               | 0            | 0.0177218       | C(48)-N(49)  | 1.1586         | 1.1580          | H(69)-C(46)-C(19)   | 110.5509       | 110.0000        | H(65)-C(41)-C(39)-C(45)   | 179.9966       | O(40)-C(41)    | 2.6925         |
| H(34) | H               | 0            | 0.0149847       | C(47)-H(74)  | 1.1132         | 1.1130          | Lp(96)-O(31)-Lp(95) | 123.4984       | 131.0000        | O(15)-C(38)-O(40)-Lp(101) | 179.6392       | Lp(89)-O(40)   | 2.1339         |
| O(35) | O Furan         | 0            | -0.171518       | C(47)-H(73)  | 1.1141         | 1.1130          | Lp(96)-O(31)-C(30)  | 118.1325       | 120.0000        | O(15)-C(38)-O(40)-Lp(102) | -1.2077        | H(55)-O(17)    | 2.4037         |
| C(36) | C Alkane        | 0            | 0.400965        | C(47)-H(72)  | 1.1135         | 1.1130          | Lp(95)-O(31)-C(30)  | 118.3662       | 120.0000        | C(39)-C(38)-O(40)-Lp(101) | 1.1667         | Lp(90)-H(57)   | 1.9268         |
| O(37) | O Furan         | 0            | -0.161504       | C(46)-H(71)  | 1.1124         | 1.1130          | C(51)-C(28)-C(29)   | 121.4437       | 121.4000        | C(39)-C(38)-O(40)-Lp(102) | -179.6802      | O(15)-H(57)    | 2.4317         |
| C(38) | C Carbonyl      | 0            | 0.608853        | C(46)-H(70)  | 1.1140         | 1.1130          | C(51)-C(28)-C(27)   | 117.3218       | 120.0000        | O(15)-C(38)-C(39)-C(41)   | 179.5660       | C(11)-H(55)    | 2.5306         |
| C(39) | C Alkene        | 0            | 0.0330278       | C(46)-H(69)  | 1.1141         | 1.1130          | C(29)-C(28)-C(27)   | 121.2338       | 117.6000        | O(15)-C(38)-C(39)-C(45)   | -0.5173        | C(11)-C(14)    | 2.8255         |
| O(40) | O Carbonyl      | 0            | -0.641866       | C(45)-H(68)  | 1.0999         | 1.1000          | O(52)-C(29)-C(30)   | 117.9438       | 120.0000        | O(40)-C(38)-C(39)-C(41)   | -2.0422        | C(50)-C(38)    | 2.8722         |
| C(41) | C Alkene        | 0            | -0.0354614      | C(44)-H(67)  | 1.1037         | 1.1000          | O(52)-C(29)-C(28)   | 121.6500       | 124.3000        | O(40)-C(38)-C(39)-C(45)   | 177.8745       | C(4)-C(9)      | 2.7952         |
| C(42) | C Alkene        | 0            | 0.124994        | C(45)-C(44)  | 1.3432         | 1.4200          | C(30)-C(29)-C(28)   | 119.9514       | 117.6000        | O(35)-C(36)-O(37)-C(3)    | 0.1169         | C(2)-C(5)      | 2.6401         |
| N(43) | N Pyridine      | 0            | -0.178624       | C(44)-N(43)  | 1.2648         | 1.3580          | O(32)-C(27)-C(28)   | 121.1152       | 123.0000        | O(35)-C(36)-O(37)-Lp(100) | 166.7924       | C(3)-C(6)      | 2.6857         |
| C(44) | C Alkene        | 0            | 0.125458        | C(42)-H(66)  | 1.1036         | 1.1000          | O(32)-C(27)-C(26)   | 120.6364       | 123.0000        | H(63)-C(36)-O(37)-C(3)    | -118.0686      | C(1)-C(4)      | 2.7515         |
| C(45) | C Alkene        | 0            | -0.0385508      | N(43)-C(42)  | 1.2648         | 1.3580          | C(28)-C(27)-C(26)   | 118.2476       | 115.0000        | H(63)-C(36)-O(37)-Lp(100) | 48.6069        |                |                |

| Atom  | Atom Type (MM2) | Charge (MM2) | Charge (Huckel) | Bond lengths |                |                 | Bond Angles         |                |                 | Dihedral angles           |                | Close contacts |                |
|-------|-----------------|--------------|-----------------|--------------|----------------|-----------------|---------------------|----------------|-----------------|---------------------------|----------------|----------------|----------------|
|       |                 |              |                 | Atoms        | Actual (° / Å) | Optimal (° / Å) | Atoms               | Actual (° / Å) | Optimal (° / Å) | Atoms                     | Actual (° / Å) | Atoms          | Actual (° / Å) |
| C(46) | C Alkane        | 0            | -0.129009       | C(41)-H(65)  | 1.1020         | 1.1000          | C(47)-C(21)-H(22)   | 113.6394       | 118.2000        | H(64)-C(36)-O(37)-C(3)    | 118.5426       |                |                |
| C(47) | C Alkane        | 0            | -0.135835       | C(41)-C(42)  | 1.3434         | 1.4200          | C(47)-C(21)-C(19)   | 129.0427       | 122.0000        | H(64)-C(36)-O(37)-Lp(100) | -74.7820       |                |                |
| C(48) | C Alkyne        | 0            | 0.371016        | C(39)-C(45)  | 1.3466         | 1.4200          | H(22)-C(21)-C(19)   | 117.3173       | 120.0000        | C(2)-O(35)-C(36)-O(37)    | 0.0602         |                |                |
| N(49) | N Nitrile       | 0            | -0.421866       | C(41)-C(39)  | 1.3477         | 1.4200          | Lp(94)-O(20)-Lp(93) | 123.4273       | 131.0000        | C(2)-O(35)-C(36)-H(63)    | 118.2115       |                |                |
| C(50) | C Alkane        | 0            | -0.140105       | C(38)-O(40)  | 1.2192         | 1.2080          | Lp(94)-O(20)-C(18)  | 117.4215       | 120.0000        | C(2)-O(35)-C(36)-H(64)    | -118.0947      |                |                |
| C(51) | C Alkane        | 0            | -0.134824       | C(38)-C(39)  | 1.3695         | 1.5170          | Lp(93)-O(20)-C(18)  | 119.1509       | 120.0000        | Lp(99)-O(35)-C(36)-O(37)  | 158.3840       |                |                |
| O(52) | O Enol          | 0            | -0.272413       | C(36)-H(64)  | 1.1146         | 1.1130          | H(86)-C(54)-H(85)   | 107.8125       | 109.0000        | Lp(99)-O(35)-C(36)-H(63)  | -83.4647       |                |                |
| C(53) | C Alkane        | 0            | 0.0878443       | C(36)-H(63)  | 1.1147         | 1.1130          | H(86)-C(54)-H(84)   | 107.7237       | 109.0000        | Lp(99)-O(35)-C(36)-H(64)  | 40.2290        |                |                |
| C(54) | C Alkane        | 0            | -0.03178        | C(36)-O(37)  | 1.4240         | 1.4140          | H(86)-C(54)-N(13)   | 113.3826       |                 | C(24)-C(30)-O(31)-Lp(95)  | -179.2556      |                |                |
| H(55) | H               | 0            | 0.0499938       | O(35)-C(36)  | 1.4261         | 1.4140          | H(85)-C(54)-H(84)   | 106.5166       | 109.0000        | C(24)-C(30)-O(31)-Lp(96)  | 0.1446         |                |                |
| H(56) | H               | 0            | 0.0413223       | C(30)-O(31)  | 1.2162         | 1.2080          | H(85)-C(54)-N(13)   | 110.5095       |                 | C(29)-C(30)-O(31)-Lp(95)  | 0.5425         |                |                |
| H(57) | H               | 0            | 0.0308042       | C(29)-O(52)  | 1.3765         | 1.3550          | H(84)-C(54)-N(13)   | 110.6061       |                 | C(29)-C(30)-O(31)-Lp(96)  | 179.9427       |                |                |
| H(58) | H               | 0            | 0.0430694       | C(29)-C(30)  | 1.3651         | 1.5170          | H(67)-C(44)-C(45)   | 119.9545       | 120.0000        | C(28)-C(29)-O(52)-C(53)   | 99.4168        |                |                |
| H(59) | H               | 0            | 0.0173619       | C(28)-C(51)  | 1.5184         | 1.4970          | H(67)-C(44)-N(43)   | 115.9556       | 116.5000        | C(28)-C(29)-O(52)-Lp(104) | -145.6913      |                |                |
| H(60) | H               | 0            | 0.0174401       | C(28)-C(29)  | 1.3484         | 1.3370          | C(45)-C(44)-N(43)   | 124.0898       | 123.5000        | C(28)-C(29)-O(52)-Lp(105) | -13.7472       |                |                |
| H(61) | H               | 0            | 0.0366083       | C(27)-O(32)  | 1.2158         | 1.2080          | Lp(103)-N(43)-C(44) | 121.3735       | 122.5000        | C(30)-C(29)-O(52)-C(53)   | -88.3296       |                |                |
| H(62) | H               | 0            | 0.0407877       | C(27)-C(28)  | 1.3600         | 1.5170          | Lp(103)-N(43)-C(42) | 121.4465       | 122.5000        | C(30)-C(29)-O(52)-Lp(104) | 26.5623        |                |                |
| H(63) | H               | 0            | 0.00574024      | C(26)-C(27)  | 1.3600         | 1.5170          | C(44)-N(43)-C(42)   | 117.1799       | 115.0000        | C(30)-C(29)-O(52)-Lp(105) | 158.5064       |                |                |
| H(64) | H               | 0            | 0.00576146      | C(25)-H(62)  | 1.1176         | 1.1130          | O(31)-C(30)-C(29)   | 120.2758       | 123.0000        | C(28)-C(29)-C(30)-C(24)   | -1.8217        |                |                |
| H(65) | H               | 0            | 0.0187835       | C(25)-H(61)  | 1.1149         | 1.1130          | O(31)-C(30)-C(24)   | 120.6973       | 123.0000        | C(28)-C(29)-C(30)-O(31)   | 178.3769       |                |                |
| H(66) | H               | 0            | -0.00404144     | C(26)-C(25)  | 1.5150         | 1.4970          | C(29)-C(30)-C(24)   | 119.0266       | 115.0000        | O(52)-C(29)-C(30)-C(24)   | -174.2118      |                |                |
| H(67) | H               | 0            | -0.00450932     | C(30)-C(24)  | 1.3627         | 1.5170          | H(62)-C(25)-H(61)   | 106.9471       | 109.4000        | O(52)-C(29)-C(30)-O(31)   | 5.9868         |                |                |
| H(68) | H               | 0            | 0.0227564       | C(24)-C(26)  | 1.3444         | 1.3370          | H(62)-C(25)-C(26)   | 107.0768       | 109.4100        | C(27)-C(28)-C(51)-H(78)   | -60.0973       |                |                |
| H(69) | H               | 0            | 0.0496646       | C(21)-C(47)  | 1.5068         | 1.4970          | H(62)-C(25)-C(12)   | 107.8789       | 109.4100        | C(27)-C(28)-C(51)-H(79)   | 60.2392        |                |                |
| H(70) | H               | 0            | 0.0483295       | C(21)-H(22)  | 1.1048         | 1.1000          | H(61)-C(25)-C(26)   | 109.9175       | 109.4100        | C(27)-C(28)-C(51)-H(80)   | 179.9322       |                |                |
| H(71) | H               | 0            | 0.0367351       | C(19)-C(46)  | 1.5181         | 1.4970          | H(61)-C(25)-C(12)   | 109.5691       | 109.4100        | C(29)-C(28)-C(51)-H(78)   | 120.2102       |                |                |
| H(72) | H               | 0            | 0.0596888       | C(19)-C(21)  | 1.3481         | 1.3370          | C(26)-C(25)-C(12)   | 115.0973       | 109.5000        | C(29)-C(28)-C(51)-H(79)   | -119.4532      |                |                |
| H(73) | H               | 0            | 0.0426911       | C(18)-O(20)  | 1.2140         | 1.2080          | C(46)-C(19)-C(21)   | 118.9044       | 121.4000        | C(29)-C(28)-C(51)-H(80)   | 0.2397         |                |                |
| H(74) | H               | 0            | 0.0568657       | C(18)-C(19)  | 1.3669         | 1.5170          | C(46)-C(19)-C(18)   | 116.9057       | 120.0000        | C(27)-C(28)-C(29)-C(30)   | 3.1959         |                |                |
| H(75) | H               | 0            | 0.0399295       | O(17)-C(18)  | 1.3754         | 1.3380          | C(21)-C(19)-C(18)   | 124.1897       | 117.6000        | C(27)-C(28)-C(29)-O(52)   | 175.2969       |                |                |



| Atom  | Atom Type (MM2) | Charge (MM2) | Charge (Huckel) | Bond lengths |                   |                    | Bond Angles           |                   |                    | Dihedral angles          |                   | Close contacts |                   |
|-------|-----------------|--------------|-----------------|--------------|-------------------|--------------------|-----------------------|-------------------|--------------------|--------------------------|-------------------|----------------|-------------------|
|       |                 |              |                 | Atoms        | Actual<br>(° / Å) | Optimal<br>(° / Å) | Atoms                 | Actual<br>(° / Å) | Optimal<br>(° / Å) | Atoms                    | Actual<br>(° / Å) | Atoms          | Actual<br>(° / Å) |
| H(76) | H               | 0            | 0.0455506       | C(16)-H(60)  | 1.1122            | 1.1110             | H(68)-C(45)-C(44)     | 117.6517          | 120.0000           | C(51)-C(28)-C(29)-C(30)  | -177.1237         |                |                   |
| H(77) | H               | 0            | 0.0494254       | C(16)-H(59)  | 1.1136            | 1.1110             | H(68)-C(45)-C(39)     | 122.9969          | 120.0000           | C(51)-C(28)-C(29)-O(52)  | -5.0227           |                |                   |
| H(78) | H               | 0            | 0.0456607       | C(16)-O(17)  | 1.4062            | 1.3890             | C(44)-C(45)-C(39)     | 119.3508          |                    | C(26)-C(27)-O(32)-Lp(97) | -179.9372         |                |                   |
| H(79) | H               | 0            | 0.0462187       | O(15)-C(38)  | 1.3766            | 1.3380             | H(66)-C(42)-N(43)     | 115.9194          | 116.5000           | C(26)-C(27)-O(32)-Lp(98) | 0.2213            |                |                   |
| H(80) | H               | 0            | 0.0381496       | C(14)-H(33)  | 1.1177            | 1.1130             | H(66)-C(42)-C(41)     | 119.9881          | 120.0000           | C(28)-C(27)-O(32)-Lp(97) | -0.2820           |                |                   |
| H(81) | H               | 0            | 0.0284281       | C(14)-C(24)  | 1.5269            | 1.4970             | N(43)-C(42)-C(41)     | 124.0925          | 123.5000           | C(28)-C(27)-O(32)-Lp(98) | 179.8764          |                |                   |
| H(82) | H               | 0            | 0.0231376       | N(13)-C(54)  | 1.4548            | 1.4380             | C(27)-C(26)-C(25)     | 118.1263          | 120.0000           | C(26)-C(27)-C(28)-C(29)  | -2.1550           |                |                   |
| H(83) | H               | 0            | 0.0234917       | N(13)-C(14)  | 1.4557            | 1.4380             | C(27)-C(26)-C(24)     | 121.1648          | 117.6000           | C(26)-C(27)-C(28)-C(51)  | 178.1519          |                |                   |
| H(84) | H               | 0            | 0.0361682       | C(12)-H(34)  | 1.1205            | 1.1130             | C(25)-C(26)-C(24)     | 120.6916          | 121.4000           | O(32)-C(27)-C(28)-C(29)  | 178.1819          |                |                   |
| H(85) | H               | 0            | 0.0361927       | C(12)-C(25)  | 1.5376            | 1.5230             | O(20)-C(18)-C(19)     | 122.4660          | 123.0000           | O(32)-C(27)-C(28)-C(51)  | -1.5113           |                |                   |
| H(86) | H               | 0            | 0.047826        | C(12)-N(13)  | 1.4501            | 1.4380             | O(20)-C(18)-O(17)     | 118.4926          | 122.0000           | C(24)-C(26)-C(27)-C(28)  | -0.2312           |                |                   |
|       |                 |              |                 | C(11)-H(58)  | 1.1170            | 1.1130             | C(19)-C(18)-O(17)     | 118.9749          | 124.3000           | C(24)-C(26)-C(27)-O(32)  | 179.4336          |                |                   |
|       |                 |              |                 | C(11)-C(48)  | 1.4835            | 1.4700             | Lp(88)-N(13)-C(54)    | 107.5539          | 109.2000           | C(25)-C(26)-C(27)-C(28)  | 178.2683          |                |                   |
|       |                 |              |                 | C(11)-C(12)  | 1.5409            | 1.5230             | Lp(88)-N(13)-C(14)    | 107.3438          | 109.2000           | C(25)-C(26)-C(27)-O(32)  | -2.0669           |                |                   |
|       |                 |              |                 | C(10)-H(57)  | 1.1131            | 1.1130             | Lp(88)-N(13)-C(12)    | 106.9561          | 109.2000           | C(24)-C(26)-C(25)-C(12)  | -0.1865           |                |                   |
|       |                 |              |                 | C(10)-H(56)  | 1.1147            | 1.1130             | C(54)-N(13)-C(14)     | 113.0580          | 107.7000           | C(24)-C(26)-C(25)-H(61)  | -124.4574         |                |                   |
|       |                 |              |                 | C(9)-H(23)   | 1.1194            | 1.1130             | C(54)-N(13)-C(12)     | 113.2758          | 107.7000           | C(24)-C(26)-C(25)-H(62)  | 119.7164          |                |                   |
|       |                 |              |                 | C(14)-C(9)   | 1.5555            | 1.5230             | C(14)-N(13)-C(12)     | 108.3142          | 107.7000           | C(27)-C(26)-C(25)-C(12)  | -178.6934         |                |                   |
|       |                 |              |                 | C(9)-C(10)   | 1.5362            | 1.5230             | H(34)-C(12)-C(25)     | 108.5458          | 109.3900           | C(27)-C(26)-C(25)-H(61)  | 57.0357           |                |                   |
|       |                 |              |                 | N(8)-C(11)   | 1.4664            | 1.4380             | H(34)-C(12)-N(13)     | 109.2541          | 108.8000           | C(27)-C(26)-C(25)-H(62)  | -58.7904          |                |                   |
|       |                 |              |                 | N(8)-C(9)    | 1.4501            | 1.4380             | H(34)-C(12)-C(11)     | 106.0936          | 109.3900           | C(29)-C(30)-C(24)-C(14)  | 179.1484          |                |                   |
|       |                 |              |                 | C(7)-H(55)   | 1.1177            | 1.1130             | C(25)-C(12)-N(13)     | 112.3896          | 108.8000           | C(29)-C(30)-C(24)-C(26)  | -0.5189           |                |                   |
|       |                 |              |                 | C(7)-C(16)   | 1.5433            | 1.5140             | C(25)-C(12)-C(11)     | 112.1455          | 109.5100           | O(31)-C(30)-C(24)-C(14)  | -1.0511           |                |                   |
|       |                 |              |                 | C(7)-N(8)    | 1.4650            | 1.4380             | N(13)-C(12)-C(11)     | 108.1942          | 108.8000           | O(31)-C(30)-C(24)-C(26)  | 179.2816          |                |                   |
|       |                 |              |                 | C(6)-O(15)   | 1.3775            | 1.3550             | N(49)-C(48)-C(11)     | 178.6194          | 180.0000           | C(14)-C(24)-C(26)-C(25)  | 3.4199            |                |                   |
|       |                 |              |                 | C(10)-C(5)   | 1.5104            | 1.4970             | H(65)-C(41)-C(42)     | 117.7427          | 120.0000           | C(14)-C(24)-C(26)-C(27)  | -178.1190         |                |                   |
|       |                 |              |                 | C(5)-C(6)    | 1.3601            | 1.4200             | H(65)-C(41)-C(39)     | 122.9479          | 120.0000           | C(30)-C(24)-C(26)-C(25)  | -176.9087         |                |                   |
|       |                 |              |                 | C(4)-C(7)    | 1.5243            | 1.4970             | C(42)-C(41)-C(39)     | 119.3091          |                    | C(30)-C(24)-C(26)-C(27)  | 1.5524            |                |                   |
|       |                 |              |                 | C(4)-C(5)    | 1.3466            | 1.4200             | Lp(102)-O(40)-Lp(101) | 123.8053          | 131.0000           | C(19)-C(21)-C(47)-H(72)  | 65.8835           |                |                   |
|       |                 |              |                 | O(37)-C(3)   | 1.2283            | 1.4210             | Lp(102)-O(40)-C(38)   | 117.4936          | 120.0000           | C(19)-C(21)-C(47)-H(73)  | -175.7284         |                |                   |

| Atom | Atom Type (MM2) | Charge (MM2) | Charge (Huckel) | Bond lengths |                   |                    | Bond Angles         |                   |                    | Dihedral angles          |                   | Close contacts |                   |
|------|-----------------|--------------|-----------------|--------------|-------------------|--------------------|---------------------|-------------------|--------------------|--------------------------|-------------------|----------------|-------------------|
|      |                 |              |                 | Atoms        | Actual<br>(° / Å) | Optimal<br>(° / Å) | Atoms               | Actual<br>(° / Å) | Optimal<br>(° / Å) | Atoms                    | Actual<br>(° / Å) | Atoms          | Actual<br>(° / Å) |
|      |                 |              |                 | C(3)-C(4)    | 1.3402            | 1.4200             | Lp(101)-O(40)-C(38) | 118.6952          | 120.0000           | C(19)-C(21)-C(47)-H(74)  | -57.7232          |                |                   |
|      |                 |              |                 | C(2)-O(35)   | 1.2297            | 1.4210             | C(30)-C(24)-C(26)   | 120.3026          | 117.6000           | H(22)-C(21)-C(47)-H(72)  | -113.8276         |                |                   |
|      |                 |              |                 | C(2)-C(3)    | 1.3347            | 1.4200             | C(30)-C(24)-C(14)   | 120.4708          | 120.0000           | H(22)-C(21)-C(47)-H(73)  | 4.5606            |                |                   |
|      |                 |              |                 | C(1)-C(50)   | 1.5137            | 1.4970             | C(26)-C(24)-C(14)   | 119.2258          | 121.4000           | H(22)-C(21)-C(47)-H(74)  | 122.5658          |                |                   |
|      |                 |              |                 | C(6)-C(1)    | 1.3567            | 1.4200             | Lp(92)-O(17)-Lp(91) | 127.2767          | 131.0000           | C(18)-C(19)-C(46)-H(69)  | -62.7313          |                |                   |
|      |                 |              |                 | C(1)-C(2)    | 1.3418            | 1.4200             | Lp(92)-O(17)-C(18)  | 100.2689          | 105.1600           | C(18)-C(19)-C(46)-H(70)  | 57.8337           |                |                   |
|      |                 |              |                 |              |                   |                    | Lp(92)-O(17)-C(16)  | 105.5038          | 105.3600           | C(18)-C(19)-C(46)-H(71)  | 177.5587          |                |                   |
|      |                 |              |                 |              |                   |                    | Lp(91)-O(17)-C(18)  | 100.9181          | 105.1600           | C(21)-C(19)-C(46)-H(69)  | 117.1127          |                |                   |
|      |                 |              |                 |              |                   |                    | Lp(91)-O(17)-C(16)  | 104.6792          | 105.3600           | C(21)-C(19)-C(46)-H(70)  | -122.3223         |                |                   |
|      |                 |              |                 |              |                   |                    | C(18)-O(17)-C(16)   | 119.6452          | 109.9000           | C(21)-C(19)-C(46)-H(71)  | -2.5974           |                |                   |
|      |                 |              |                 |              |                   |                    | C(45)-C(39)-C(41)   | 115.9774          | 120.0000           | C(18)-C(19)-C(21)-H(22)  | 179.2450          |                |                   |
|      |                 |              |                 |              |                   |                    | C(45)-C(39)-C(38)   | 121.9226          | 117.6000           | C(18)-C(19)-C(21)-C(47)  | -0.4570           |                |                   |
|      |                 |              |                 |              |                   |                    | C(41)-C(39)-C(38)   | 122.0999          | 117.6000           | C(46)-C(19)-C(21)-H(22)  | -0.5868           |                |                   |
|      |                 |              |                 |              |                   |                    | H(60)-C(16)-H(59)   | 106.1945          | 109.4000           | C(46)-C(19)-C(21)-C(47)  | 179.7112          |                |                   |
|      |                 |              |                 |              |                   |                    | H(60)-C(16)-O(17)   | 111.3524          | 106.7000           | O(17)-C(18)-O(20)-Lp(93) | 178.2352          |                |                   |
|      |                 |              |                 |              |                   |                    | H(60)-C(16)-C(7)    | 109.4805          | 109.4100           | O(17)-C(18)-O(20)-Lp(94) | -1.9763           |                |                   |
|      |                 |              |                 |              |                   |                    | H(59)-C(16)-O(17)   | 107.9909          | 106.7000           | C(19)-C(18)-O(20)-Lp(93) | 1.2346            |                |                   |
|      |                 |              |                 |              |                   |                    | H(59)-C(16)-C(7)    | 112.4596          | 109.4100           | C(19)-C(18)-O(20)-Lp(94) | -178.9770         |                |                   |
|      |                 |              |                 |              |                   |                    | O(17)-C(16)-C(7)    | 109.3473          | 107.4000           | O(17)-C(18)-C(19)-C(21)  | -179.2567         |                |                   |
|      |                 |              |                 |              |                   |                    | H(33)-C(14)-C(24)   | 110.3189          | 109.3900           | O(17)-C(18)-C(19)-C(46)  | 0.5782            |                |                   |
|      |                 |              |                 |              |                   |                    | H(33)-C(14)-N(13)   | 105.8861          | 108.8000           | O(20)-C(18)-C(19)-C(21)  | -2.2700           |                |                   |
|      |                 |              |                 |              |                   |                    | H(33)-C(14)-C(9)    | 107.1066          | 109.3900           | O(20)-C(18)-C(19)-C(46)  | 177.5649          |                |                   |
|      |                 |              |                 |              |                   |                    | C(24)-C(14)-N(13)   | 110.9634          |                    | C(16)-O(17)-C(18)-C(19)  | 157.2021          |                |                   |
|      |                 |              |                 |              |                   |                    | C(24)-C(14)-C(9)    | 112.3930          | 109.5100           | C(16)-O(17)-C(18)-O(20)  | -19.9053          |                |                   |
|      |                 |              |                 |              |                   |                    | N(13)-C(14)-C(9)    | 109.8997          | 108.8000           | Lp(91)-O(17)-C(18)-C(19) | 43.2026           |                |                   |
|      |                 |              |                 |              |                   |                    | H(58)-C(11)-C(48)   | 105.1334          | 109.3900           | Lp(91)-O(17)-C(18)-O(20) | -133.9049         |                |                   |
|      |                 |              |                 |              |                   |                    | H(58)-C(11)-C(12)   | 108.1793          | 109.3900           | Lp(92)-O(17)-C(18)-C(19) | -88.2361          |                |                   |
|      |                 |              |                 |              |                   |                    | H(58)-C(11)-N(8)    | 109.7685          | 108.8000           | Lp(92)-O(17)-C(18)-O(20) | 94.6564           |                |                   |
|      |                 |              |                 |              |                   |                    | C(48)-C(11)-C(12)   | 110.5548          | 112.4000           | C(7)-C(16)-O(17)-C(18)   | -148.0337         |                |                   |
|      |                 |              |                 |              |                   |                    | C(48)-C(11)-N(8)    | 112.1376          |                    | C(7)-C(16)-O(17)-Lp(91)  | -36.0483          |                |                   |

| Atom | Atom Type (MM2) | Charge (MM2) | Charge (Huckel) | Bond lengths |                   |                    | Bond Angles         |                   |                    | Dihedral angles          |                   | Close contacts |                   |
|------|-----------------|--------------|-----------------|--------------|-------------------|--------------------|---------------------|-------------------|--------------------|--------------------------|-------------------|----------------|-------------------|
|      |                 |              |                 | Atoms        | Actual<br>(° / Å) | Optimal<br>(° / Å) | Atoms               | Actual<br>(° / Å) | Optimal<br>(° / Å) | Atoms                    | Actual<br>(° / Å) | Atoms          | Actual<br>(° / Å) |
|      |                 |              |                 |              |                   |                    | C(12)-C(11)-N(8)    | 110.8419          | 108.8000           | C(7)-C(16)-O(17)-Lp(92)  | 100.2054          |                |                   |
|      |                 |              |                 |              |                   |                    | O(40)-C(38)-C(39)   | 119.7654          | 123.0000           | H(59)-C(16)-O(17)-C(18)  | 89.3005           |                |                   |
|      |                 |              |                 |              |                   |                    | O(40)-C(38)-O(15)   | 117.5659          | 122.0000           | H(59)-C(16)-O(17)-Lp(91) | -158.7140         |                |                   |
|      |                 |              |                 |              |                   |                    | C(39)-C(38)-O(15)   | 122.6501          | 124.3000           | H(59)-C(16)-O(17)-Lp(92) | -22.4603          |                |                   |
|      |                 |              |                 |              |                   |                    | H(23)-C(9)-C(14)    | 108.2334          | 109.3900           | H(60)-C(16)-O(17)-C(18)  | -26.9184          |                |                   |
|      |                 |              |                 |              |                   |                    | H(23)-C(9)-C(10)    | 107.9187          | 109.3900           | H(60)-C(16)-O(17)-Lp(91) | 85.0670           |                |                   |
|      |                 |              |                 |              |                   |                    | H(23)-C(9)-N(8)     | 109.0791          | 108.8000           | H(60)-C(16)-O(17)-Lp(92) | -138.6793         |                |                   |
|      |                 |              |                 |              |                   |                    | C(14)-C(9)-C(10)    | 111.3273          | 109.5100           | C(6)-O(15)-C(38)-C(39)   | -66.6096          |                |                   |
|      |                 |              |                 |              |                   |                    | C(14)-C(9)-N(8)     | 111.3344          | 108.8000           | C(6)-O(15)-C(38)-O(40)   | 114.9652          |                |                   |
|      |                 |              |                 |              |                   |                    | C(10)-C(9)-N(8)     | 108.8627          | 108.8000           | Lp(89)-O(15)-C(38)-C(39) | -179.7986         |                |                   |
|      |                 |              |                 |              |                   |                    | Lp(87)-N(8)-C(11)   | 106.7900          | 109.2000           | Lp(89)-O(15)-C(38)-O(40) | 1.7762            |                |                   |
|      |                 |              |                 |              |                   |                    | Lp(87)-N(8)-C(9)    | 106.5303          | 109.2000           | Lp(90)-O(15)-C(38)-C(39) | 45.5699           |                |                   |
|      |                 |              |                 |              |                   |                    | Lp(87)-N(8)-C(7)    | 106.9021          | 109.2000           | Lp(90)-O(15)-C(38)-O(40) | -132.8553         |                |                   |
|      |                 |              |                 |              |                   |                    | C(11)-N(8)-C(9)     | 110.3686          | 107.7000           | C(9)-C(14)-C(24)-C(26)   | 88.4056           |                |                   |
|      |                 |              |                 |              |                   |                    | C(11)-N(8)-C(7)     | 111.4039          | 107.7000           | C(9)-C(14)-C(24)-C(30)   | -91.2652          |                |                   |
|      |                 |              |                 |              |                   |                    | C(9)-N(8)-C(7)      | 114.3809          | 107.7000           | N(13)-C(14)-C(24)-C(26)  | -35.1049          |                |                   |
|      |                 |              |                 |              |                   |                    | Lp(90)-O(15)-Lp(89) | 129.9789          | 131.0000           | N(13)-C(14)-C(24)-C(30)  | 145.2243          |                |                   |
|      |                 |              |                 |              |                   |                    | Lp(90)-O(15)-C(38)  | 98.7698           | 105.1600           | H(33)-C(14)-C(24)-C(26)  | -152.1343         |                |                   |
|      |                 |              |                 |              |                   |                    | Lp(90)-O(15)-C(6)   | 104.2265          | 103.2600           | H(33)-C(14)-C(24)-C(30)  | 28.1949           |                |                   |
|      |                 |              |                 |              |                   |                    | Lp(89)-O(15)-C(38)  | 102.9499          | 105.1600           | C(12)-N(13)-C(54)-H(84)  | 176.3329          |                |                   |
|      |                 |              |                 |              |                   |                    | Lp(89)-O(15)-C(6)   | 102.6460          | 103.2600           | C(12)-N(13)-C(54)-H(85)  | 58.6273           |                |                   |
|      |                 |              |                 |              |                   |                    | C(38)-O(15)-C(6)    | 120.2017          | 112.0000           | C(12)-N(13)-C(54)-H(86)  | -62.5420          |                |                   |
|      |                 |              |                 |              |                   |                    | H(57)-C(10)-H(56)   | 108.7035          | 109.4000           | C(14)-N(13)-C(54)-H(84)  | -59.9649          |                |                   |
|      |                 |              |                 |              |                   |                    | H(57)-C(10)-C(9)    | 106.6970          | 109.4100           | C(14)-N(13)-C(54)-H(85)  | -177.6705         |                |                   |
|      |                 |              |                 |              |                   |                    | H(57)-C(10)-C(5)    | 111.5444          | 109.4100           | C(14)-N(13)-C(54)-H(86)  | 61.1602           |                |                   |
|      |                 |              |                 |              |                   |                    | H(56)-C(10)-C(9)    | 111.0462          | 109.4100           | Lp(88)-N(13)-C(54)-H(84) | 58.3597           |                |                   |
|      |                 |              |                 |              |                   |                    | H(56)-C(10)-C(5)    | 105.9281          | 109.4100           | Lp(88)-N(13)-C(54)-H(85) | -59.3460          |                |                   |
|      |                 |              |                 |              |                   |                    | C(9)-C(10)-C(5)     | 112.9126          | 109.5000           | Lp(88)-N(13)-C(54)-H(86) | 179.4848          |                |                   |
|      |                 |              |                 |              |                   |                    | H(55)-C(7)-C(16)    | 109.7920          | 109.3900           | C(12)-N(13)-C(14)-C(9)   | -61.7401          |                |                   |
|      |                 |              |                 |              |                   |                    | H(55)-C(7)-N(8)     | 108.5365          | 108.8000           | C(12)-N(13)-C(14)-C(24)  | 63.1886           |                |                   |

| Atom | Atom Type (MM2) | Charge (MM2) | Charge (Huckel) | Bond lengths |                   |                    | Bond Angles         |                   |                    | Dihedral angles          |                   | Close contacts |                   |
|------|-----------------|--------------|-----------------|--------------|-------------------|--------------------|---------------------|-------------------|--------------------|--------------------------|-------------------|----------------|-------------------|
|      |                 |              |                 | Atoms        | Actual<br>(° / Å) | Optimal<br>(° / Å) | Atoms               | Actual<br>(° / Å) | Optimal<br>(° / Å) | Atoms                    | Actual<br>(° / Å) | Atoms          | Actual<br>(° / Å) |
|      |                 |              |                 |              |                   |                    | H(55)-C(7)-C(4)     | 101.4946          | 109.3900           | C(12)-N(13)-C(14)-H(33)  | -177.0980         |                |                   |
|      |                 |              |                 |              |                   |                    | C(16)-C(7)-N(8)     | 109.7789          | 108.8000           | C(54)-N(13)-C(14)-C(9)   | 171.8702          |                |                   |
|      |                 |              |                 |              |                   |                    | C(16)-C(7)-C(4)     | 111.7862          | 109.5100           | C(54)-N(13)-C(14)-C(24)  | -63.2012          |                |                   |
|      |                 |              |                 |              |                   |                    | N(8)-C(7)-C(4)      | 115.0519          |                    | C(54)-N(13)-C(14)-H(33)  | 56.5122           |                |                   |
|      |                 |              |                 |              |                   |                    | H(77)-C(50)-H(76)   | 110.5864          | 109.0000           | Lp(88)-N(13)-C(14)-C(9)  | 53.4234           |                |                   |
|      |                 |              |                 |              |                   |                    | H(77)-C(50)-H(75)   | 106.3973          | 109.0000           | Lp(88)-N(13)-C(14)-C(24) | 178.3521          |                |                   |
|      |                 |              |                 |              |                   |                    | H(77)-C(50)-C(1)    | 111.1264          | 110.0000           | Lp(88)-N(13)-C(14)-H(33) | -61.9345          |                |                   |
|      |                 |              |                 |              |                   |                    | H(76)-C(50)-H(75)   | 104.4716          | 109.0000           | C(11)-C(12)-C(25)-C(26)  | -93.2006          |                |                   |
|      |                 |              |                 |              |                   |                    | H(76)-C(50)-C(1)    | 110.9266          | 110.0000           | C(11)-C(12)-C(25)-H(61)  | 31.2531           |                |                   |
|      |                 |              |                 |              |                   |                    | H(75)-C(50)-C(1)    | 113.0625          | 110.0000           | C(11)-C(12)-C(25)-H(62)  | 147.3395          |                |                   |
|      |                 |              |                 |              |                   |                    | Lp(100)-O(37)-C(36) | 126.0944          | 124.2000           | N(13)-C(12)-C(25)-C(26)  | 28.9571           |                |                   |
|      |                 |              |                 |              |                   |                    | Lp(100)-O(37)-C(3)  | 124.5807          | 122.2000           | N(13)-C(12)-C(25)-H(61)  | 153.4109          |                |                   |
|      |                 |              |                 |              |                   |                    | C(36)-O(37)-C(3)    | 107.8714          | 113.6000           | N(13)-C(12)-C(25)-H(62)  | -90.5027          |                |                   |
|      |                 |              |                 |              |                   |                    | H(64)-C(36)-H(63)   | 110.7770          | 109.4000           | H(34)-C(12)-C(25)-C(26)  | 149.9135          |                |                   |
|      |                 |              |                 |              |                   |                    | H(64)-C(36)-O(37)   | 110.7598          |                    | H(34)-C(12)-C(25)-H(61)  | -85.6328          |                |                   |
|      |                 |              |                 |              |                   |                    | H(64)-C(36)-O(35)   | 111.1404          |                    | H(34)-C(12)-C(25)-H(62)  | 30.4536           |                |                   |
|      |                 |              |                 |              |                   |                    | H(63)-C(36)-O(37)   | 110.8504          |                    | C(11)-C(12)-N(13)-C(14)  | 63.9838           |                |                   |
|      |                 |              |                 |              |                   |                    | H(63)-C(36)-O(35)   | 110.8982          |                    | C(11)-C(12)-N(13)-C(54)  | -169.7532         |                |                   |
|      |                 |              |                 |              |                   |                    | O(37)-C(36)-O(35)   | 102.1352          |                    | C(11)-C(12)-N(13)-Lp(88) | -51.4329          |                |                   |
|      |                 |              |                 |              |                   |                    | C(10)-C(5)-C(6)     | 120.0810          | 121.4000           | C(25)-C(12)-N(13)-C(14)  | -60.3871          |                |                   |
|      |                 |              |                 |              |                   |                    | C(10)-C(5)-C(4)     | 116.6915          | 121.4000           | C(25)-C(12)-N(13)-C(54)  | 65.8759           |                |                   |
|      |                 |              |                 |              |                   |                    | C(6)-C(5)-C(4)      | 123.2274          | 120.0000           | C(25)-C(12)-N(13)-Lp(88) | -175.8038         |                |                   |
|      |                 |              |                 |              |                   |                    | Lp(99)-O(35)-C(36)  | 124.8404          | 124.2000           | H(34)-C(12)-N(13)-C(14)  | 179.0642          |                |                   |
|      |                 |              |                 |              |                   |                    | Lp(99)-O(35)-C(2)   | 123.3632          | 122.2000           | H(34)-C(12)-N(13)-C(54)  | -54.6728          |                |                   |
|      |                 |              |                 |              |                   |                    | C(36)-O(35)-C(2)    | 107.9187          | 113.6000           | H(34)-C(12)-N(13)-Lp(88) | 63.6475           |                |                   |
|      |                 |              |                 |              |                   |                    | O(15)-C(6)-C(5)     | 117.5280          | 124.3000           | N(8)-C(11)-C(48)-N(49)   | -16.4505          |                |                   |
|      |                 |              |                 |              |                   |                    | O(15)-C(6)-C(1)     | 123.6939          | 124.3000           | C(12)-C(11)-C(48)-N(49)  | -140.6982         |                |                   |
|      |                 |              |                 |              |                   |                    | C(5)-C(6)-C(1)      | 118.7574          | 120.0000           | H(58)-C(11)-C(48)-N(49)  | 102.7770          |                |                   |
|      |                 |              |                 |              |                   |                    | C(7)-C(4)-C(5)      | 124.1118          | 121.4000           | N(8)-C(11)-C(12)-N(13)   | -61.6886          |                |                   |
|      |                 |              |                 |              |                   |                    | C(7)-C(4)-C(3)      | 119.6271          | 121.4000           | N(8)-C(11)-C(12)-C(25)   | 62.8281           |                |                   |

| Atom | Atom Type (MM2) | Charge (MM2) | Charge (Huckel) | Bond lengths |                   |                    | Bond Angles     |                   |                    | Dihedral angles         |                   | Close contacts |                   |
|------|-----------------|--------------|-----------------|--------------|-------------------|--------------------|-----------------|-------------------|--------------------|-------------------------|-------------------|----------------|-------------------|
|      |                 |              |                 | Atoms        | Actual<br>(° / Å) | Optimal<br>(° / Å) | Atoms           | Actual<br>(° / Å) | Optimal<br>(° / Å) | Atoms                   | Actual<br>(° / Å) | Atoms          | Actual<br>(° / Å) |
|      |                 |              |                 |              |                   |                    | C(5)-C(4)-C(3)  | 116.2599          | 120.0000           | N(8)-C(11)-C(12)-H(34)  | -178.8242         |                |                   |
|      |                 |              |                 |              |                   |                    | O(37)-C(3)-C(4) | 127.0254          | 120.0000           | C(48)-C(11)-C(12)-N(13) | 63.2981           |                |                   |
|      |                 |              |                 |              |                   |                    | O(37)-C(3)-C(2) | 111.1905          | 120.0000           | C(48)-C(11)-C(12)-C(25) | -172.1853         |                |                   |
|      |                 |              |                 |              |                   |                    | C(4)-C(3)-C(2)  | 121.7814          | 120.0000           | C(48)-C(11)-C(12)-H(34) | -53.8375          |                |                   |
|      |                 |              |                 |              |                   |                    | O(35)-C(2)-C(3) | 110.8835          | 120.0000           | H(58)-C(11)-C(12)-N(13) | 177.9183          |                |                   |
|      |                 |              |                 |              |                   |                    | O(35)-C(2)-C(1) | 127.1152          | 120.0000           | H(58)-C(11)-C(12)-C(25) | -57.5650          |                |                   |
|      |                 |              |                 |              |                   |                    | C(3)-C(2)-C(1)  | 121.9942          | 120.0000           | H(58)-C(11)-C(12)-H(34) | 60.7827           |                |                   |
|      |                 |              |                 |              |                   |                    | C(50)-C(1)-C(6) | 123.8729          | 121.4000           | N(13)-C(14)-C(9)-N(8)   | 56.6112           |                |                   |
|      |                 |              |                 |              |                   |                    | C(50)-C(1)-C(2) | 118.1696          | 121.4000           | N(13)-C(14)-C(9)-C(10)  | 178.2859          |                |                   |
|      |                 |              |                 |              |                   |                    | C(6)-C(1)-C(2)  | 117.9395          | 120.0000           | N(13)-C(14)-C(9)-H(23)  | -63.2658          |                |                   |
|      |                 |              |                 |              |                   |                    |                 |                   |                    | C(24)-C(14)-C(9)-N(8)   | -67.4910          |                |                   |
|      |                 |              |                 |              |                   |                    |                 |                   |                    | C(24)-C(14)-C(9)-C(10)  | 54.1836           |                |                   |
|      |                 |              |                 |              |                   |                    |                 |                   |                    | C(24)-C(14)-C(9)-H(23)  | 172.6319          |                |                   |
|      |                 |              |                 |              |                   |                    |                 |                   |                    | H(33)-C(14)-C(9)-N(8)   | 171.1930          |                |                   |
|      |                 |              |                 |              |                   |                    |                 |                   |                    | H(33)-C(14)-C(9)-C(10)  | -67.1324          |                |                   |
|      |                 |              |                 |              |                   |                    |                 |                   |                    | H(33)-C(14)-C(9)-H(23)  | 51.3160           |                |                   |
|      |                 |              |                 |              |                   |                    |                 |                   |                    | N(8)-C(9)-C(10)-C(5)    | -56.8449          |                |                   |
|      |                 |              |                 |              |                   |                    |                 |                   |                    | N(8)-C(9)-C(10)-H(56)   | 61.9630           |                |                   |
|      |                 |              |                 |              |                   |                    |                 |                   |                    | N(8)-C(9)-C(10)-H(57)   | -179.7338         |                |                   |
|      |                 |              |                 |              |                   |                    |                 |                   |                    | C(14)-C(9)-C(10)-C(5)   | -179.9455         |                |                   |
|      |                 |              |                 |              |                   |                    |                 |                   |                    | C(14)-C(9)-C(10)-H(56)  | -61.1376          |                |                   |
|      |                 |              |                 |              |                   |                    |                 |                   |                    | C(14)-C(9)-C(10)-H(57)  | 57.1655           |                |                   |
|      |                 |              |                 |              |                   |                    |                 |                   |                    | H(23)-C(9)-C(10)-C(5)   | 61.4173           |                |                   |
|      |                 |              |                 |              |                   |                    |                 |                   |                    | H(23)-C(9)-C(10)-H(56)  | -179.7748         |                |                   |
|      |                 |              |                 |              |                   |                    |                 |                   |                    | H(23)-C(9)-C(10)-H(57)  | -61.4717          |                |                   |
|      |                 |              |                 |              |                   |                    |                 |                   |                    | C(7)-N(8)-C(11)-C(12)   | -175.6932         |                |                   |
|      |                 |              |                 |              |                   |                    |                 |                   |                    | C(7)-N(8)-C(11)-C(48)   | 60.2190           |                |                   |
|      |                 |              |                 |              |                   |                    |                 |                   |                    | C(7)-N(8)-C(11)-H(58)   | -56.2497          |                |                   |
|      |                 |              |                 |              |                   |                    |                 |                   |                    | C(9)-N(8)-C(11)-C(12)   | 56.1013           |                |                   |
|      |                 |              |                 |              |                   |                    |                 |                   |                    | C(9)-N(8)-C(11)-C(48)   | -67.9865          |                |                   |

| Atom | Atom Type (MM2) | Charge (MM2) | Charge (Huckel) | Bond lengths |                   |                    | Bond Angles |                   |                    | Dihedral angles         |                   | Close contacts |                   |
|------|-----------------|--------------|-----------------|--------------|-------------------|--------------------|-------------|-------------------|--------------------|-------------------------|-------------------|----------------|-------------------|
|      |                 |              |                 | Atoms        | Actual<br>(° / Å) | Optimal<br>(° / Å) | Atoms       | Actual<br>(° / Å) | Optimal<br>(° / Å) | Atoms                   | Actual<br>(° / Å) | Atoms          | Actual<br>(° / Å) |
|      |                 |              |                 |              |                   |                    |             |                   |                    | C(9)-N(8)-C(11)-H(58)   | 175.5449          |                |                   |
|      |                 |              |                 |              |                   |                    |             |                   |                    | Lp(87)-N(8)-C(11)-C(12) | -59.3052          |                |                   |
|      |                 |              |                 |              |                   |                    |             |                   |                    | Lp(87)-N(8)-C(11)-C(48) | 176.6070          |                |                   |
|      |                 |              |                 |              |                   |                    |             |                   |                    | Lp(87)-N(8)-C(11)-H(58) | 60.1384           |                |                   |
|      |                 |              |                 |              |                   |                    |             |                   |                    | C(7)-N(8)-C(9)-C(10)    | 57.1833           |                |                   |
|      |                 |              |                 |              |                   |                    |             |                   |                    | C(7)-N(8)-C(9)-C(14)    | -179.7203         |                |                   |
|      |                 |              |                 |              |                   |                    |             |                   |                    | C(7)-N(8)-C(9)-H(23)    | -60.3454          |                |                   |
|      |                 |              |                 |              |                   |                    |             |                   |                    | C(11)-N(8)-C(9)-C(10)   | -176.2566         |                |                   |
|      |                 |              |                 |              |                   |                    |             |                   |                    | C(11)-N(8)-C(9)-C(14)   | -53.1603          |                |                   |
|      |                 |              |                 |              |                   |                    |             |                   |                    | C(11)-N(8)-C(9)-H(23)   | 66.2146           |                |                   |
|      |                 |              |                 |              |                   |                    |             |                   |                    | Lp(87)-N(8)-C(9)-C(10)  | -60.6872          |                |                   |
|      |                 |              |                 |              |                   |                    |             |                   |                    | Lp(87)-N(8)-C(9)-C(14)  | 62.4092           |                |                   |
|      |                 |              |                 |              |                   |                    |             |                   |                    | Lp(87)-N(8)-C(9)-H(23)  | -178.2159         |                |                   |
|      |                 |              |                 |              |                   |                    |             |                   |                    | C(4)-C(7)-C(16)-O(17)   | 110.1094          |                |                   |
|      |                 |              |                 |              |                   |                    |             |                   |                    | C(4)-C(7)-C(16)-H(59)   | -129.9323         |                |                   |
|      |                 |              |                 |              |                   |                    |             |                   |                    | C(4)-C(7)-C(16)-H(60)   | -12.1350          |                |                   |
|      |                 |              |                 |              |                   |                    |             |                   |                    | N(8)-C(7)-C(16)-O(17)   | -120.9636         |                |                   |
|      |                 |              |                 |              |                   |                    |             |                   |                    | N(8)-C(7)-C(16)-H(59)   | -1.0053           |                |                   |
|      |                 |              |                 |              |                   |                    |             |                   |                    | N(8)-C(7)-C(16)-H(60)   | 116.7920          |                |                   |
|      |                 |              |                 |              |                   |                    |             |                   |                    | H(55)-C(7)-C(16)-O(17)  | -1.7242           |                |                   |
|      |                 |              |                 |              |                   |                    |             |                   |                    | H(55)-C(7)-C(16)-H(59)  | 118.2341          |                |                   |
|      |                 |              |                 |              |                   |                    |             |                   |                    | H(55)-C(7)-C(16)-H(60)  | -123.9686         |                |                   |
|      |                 |              |                 |              |                   |                    |             |                   |                    | C(4)-C(7)-N(8)-C(9)     | -29.4248          |                |                   |
|      |                 |              |                 |              |                   |                    |             |                   |                    | C(4)-C(7)-N(8)-C(11)    | -155.4468         |                |                   |
|      |                 |              |                 |              |                   |                    |             |                   |                    | C(4)-C(7)-N(8)-Lp(87)   | 88.2336           |                |                   |
|      |                 |              |                 |              |                   |                    |             |                   |                    | C(16)-C(7)-N(8)-C(9)    | -156.5425         |                |                   |
|      |                 |              |                 |              |                   |                    |             |                   |                    | C(16)-C(7)-N(8)-C(11)   | 77.4355           |                |                   |
|      |                 |              |                 |              |                   |                    |             |                   |                    | C(16)-C(7)-N(8)-Lp(87)  | -38.8841          |                |                   |
|      |                 |              |                 |              |                   |                    |             |                   |                    | H(55)-C(7)-N(8)-C(9)    | 83.4508           |                |                   |
|      |                 |              |                 |              |                   |                    |             |                   |                    | H(55)-C(7)-N(8)-C(11)   | -42.5712          |                |                   |

| Atom | Atom Type (MM2) | Charge (MM2) | Charge (Huckel) | Bond lengths |                   |                    | Bond Angles |                   |                    | Dihedral angles         |                   | Close contacts |                   |
|------|-----------------|--------------|-----------------|--------------|-------------------|--------------------|-------------|-------------------|--------------------|-------------------------|-------------------|----------------|-------------------|
|      |                 |              |                 | Atoms        | Actual<br>(° / Å) | Optimal<br>(° / Å) | Atoms       | Actual<br>(° / Å) | Optimal<br>(° / Å) | Atoms                   | Actual<br>(° / Å) | Atoms          | Actual<br>(° / Å) |
|      |                 |              |                 |              |                   |                    |             |                   |                    | H(55)-C(7)-N(8)-Lp(87)  | -158.8908         |                |                   |
|      |                 |              |                 |              |                   |                    |             |                   |                    | C(1)-C(6)-O(15)-C(38)   | -39.1733          |                |                   |
|      |                 |              |                 |              |                   |                    |             |                   |                    | C(1)-C(6)-O(15)-Lp(89)  | 74.1762           |                |                   |
|      |                 |              |                 |              |                   |                    |             |                   |                    | C(1)-C(6)-O(15)-Lp(90)  | -148.4154         |                |                   |
|      |                 |              |                 |              |                   |                    |             |                   |                    | C(5)-C(6)-O(15)-C(38)   | 142.5086          |                |                   |
|      |                 |              |                 |              |                   |                    |             |                   |                    | C(5)-C(6)-O(15)-Lp(89)  | -104.1419         |                |                   |
|      |                 |              |                 |              |                   |                    |             |                   |                    | C(5)-C(6)-O(15)-Lp(90)  | 33.2665           |                |                   |
|      |                 |              |                 |              |                   |                    |             |                   |                    | C(9)-C(10)-C(5)-C(4)    | 28.2588           |                |                   |
|      |                 |              |                 |              |                   |                    |             |                   |                    | C(9)-C(10)-C(5)-C(6)    | -151.7713         |                |                   |
|      |                 |              |                 |              |                   |                    |             |                   |                    | H(56)-C(10)-C(5)-C(4)   | -93.4818          |                |                   |
|      |                 |              |                 |              |                   |                    |             |                   |                    | H(56)-C(10)-C(5)-C(6)   | 86.4881           |                |                   |
|      |                 |              |                 |              |                   |                    |             |                   |                    | H(57)-C(10)-C(5)-C(4)   | 148.4062          |                |                   |
|      |                 |              |                 |              |                   |                    |             |                   |                    | H(57)-C(10)-C(5)-C(6)   | -31.6238          |                |                   |
|      |                 |              |                 |              |                   |                    |             |                   |                    | C(4)-C(5)-C(6)-C(1)     | 0.7012            |                |                   |
|      |                 |              |                 |              |                   |                    |             |                   |                    | C(4)-C(5)-C(6)-O(15)    | 179.1049          |                |                   |
|      |                 |              |                 |              |                   |                    |             |                   |                    | C(10)-C(5)-C(6)-C(1)    | -179.2668         |                |                   |
|      |                 |              |                 |              |                   |                    |             |                   |                    | C(10)-C(5)-C(6)-O(15)   | -0.8630           |                |                   |
|      |                 |              |                 |              |                   |                    |             |                   |                    | C(3)-C(4)-C(7)-N(8)     | 178.4917          |                |                   |
|      |                 |              |                 |              |                   |                    |             |                   |                    | C(3)-C(4)-C(7)-C(16)    | -55.4162          |                |                   |
|      |                 |              |                 |              |                   |                    |             |                   |                    | C(3)-C(4)-C(7)-H(55)    | 61.5454           |                |                   |
|      |                 |              |                 |              |                   |                    |             |                   |                    | C(5)-C(4)-C(7)-N(8)     | -1.0901           |                |                   |
|      |                 |              |                 |              |                   |                    |             |                   |                    | C(5)-C(4)-C(7)-C(16)    | 125.0019          |                |                   |
|      |                 |              |                 |              |                   |                    |             |                   |                    | C(5)-C(4)-C(7)-H(55)    | -118.0364         |                |                   |
|      |                 |              |                 |              |                   |                    |             |                   |                    | C(3)-C(4)-C(5)-C(6)     | 0.9919            |                |                   |
|      |                 |              |                 |              |                   |                    |             |                   |                    | C(3)-C(4)-C(5)-C(10)    | -179.0392         |                |                   |
|      |                 |              |                 |              |                   |                    |             |                   |                    | C(7)-C(4)-C(5)-C(6)     | -179.4134         |                |                   |
|      |                 |              |                 |              |                   |                    |             |                   |                    | C(7)-C(4)-C(5)-C(10)    | 0.5555            |                |                   |
|      |                 |              |                 |              |                   |                    |             |                   |                    | C(36)-O(37)-C(3)-C(2)   | -0.2454           |                |                   |
|      |                 |              |                 |              |                   |                    |             |                   |                    | C(36)-O(37)-C(3)-C(4)   | 179.1628          |                |                   |
|      |                 |              |                 |              |                   |                    |             |                   |                    | Lp(100)-O(37)-C(3)-C(2) | -167.1726         |                |                   |

| Atom | Atom Type (MM2) | Charge (MM2) | Charge (Huckel) | Bond lengths |                   |                    | Bond Angles |                   |                    | Dihedral angles         |                   | Close contacts |                   |
|------|-----------------|--------------|-----------------|--------------|-------------------|--------------------|-------------|-------------------|--------------------|-------------------------|-------------------|----------------|-------------------|
|      |                 |              |                 | Atoms        | Actual<br>(° / Å) | Optimal<br>(° / Å) | Atoms       | Actual<br>(° / Å) | Optimal<br>(° / Å) | Atoms                   | Actual<br>(° / Å) | Atoms          | Actual<br>(° / Å) |
|      |                 |              |                 |              |                   |                    |             |                   |                    | LP(100)-O(37)-C(3)-C(4) | 12.2356           |                |                   |
|      |                 |              |                 |              |                   |                    |             |                   |                    | C(2)-C(3)-C(4)-C(5)     | -1.3229           |                |                   |
|      |                 |              |                 |              |                   |                    |             |                   |                    | C(2)-C(3)-C(4)-C(7)     | 179.0631          |                |                   |
|      |                 |              |                 |              |                   |                    |             |                   |                    | O(37)-C(3)-C(4)-C(5)    | 179.3262          |                |                   |
|      |                 |              |                 |              |                   |                    |             |                   |                    | O(37)-C(3)-C(4)-C(7)    | -0.2877           |                |                   |
|      |                 |              |                 |              |                   |                    |             |                   |                    | C(1)-C(2)-O(35)-C(36)   | -179.2429         |                |                   |
|      |                 |              |                 |              |                   |                    |             |                   |                    | C(1)-C(2)-O(35)-LP(99)  | 22.0397           |                |                   |
|      |                 |              |                 |              |                   |                    |             |                   |                    | C(3)-C(2)-O(35)-C(36)   | -0.2064           |                |                   |
|      |                 |              |                 |              |                   |                    |             |                   |                    | C(3)-C(2)-O(35)-LP(99)  | -158.9238         |                |                   |
|      |                 |              |                 |              |                   |                    |             |                   |                    | C(1)-C(2)-C(3)-C(4)     | -0.0502           |                |                   |
|      |                 |              |                 |              |                   |                    |             |                   |                    | C(1)-C(2)-C(3)-O(37)    | 179.3940          |                |                   |
|      |                 |              |                 |              |                   |                    |             |                   |                    | O(35)-C(2)-C(3)-C(4)    | -179.1442         |                |                   |
|      |                 |              |                 |              |                   |                    |             |                   |                    | O(35)-C(2)-C(3)-O(37)   | 0.3000            |                |                   |
|      |                 |              |                 |              |                   |                    |             |                   |                    | C(2)-C(1)-C(50)-H(75)   | 14.3688           |                |                   |
|      |                 |              |                 |              |                   |                    |             |                   |                    | C(2)-C(1)-C(50)-H(76)   | 131.3435          |                |                   |
|      |                 |              |                 |              |                   |                    |             |                   |                    | C(2)-C(1)-C(50)-H(77)   | -105.1980         |                |                   |
|      |                 |              |                 |              |                   |                    |             |                   |                    | C(6)-C(1)-C(50)-H(75)   | -164.0538         |                |                   |
|      |                 |              |                 |              |                   |                    |             |                   |                    | C(6)-C(1)-C(50)-H(76)   | -47.0792          |                |                   |
|      |                 |              |                 |              |                   |                    |             |                   |                    | C(6)-C(1)-C(50)-H(77)   | 76.3793           |                |                   |
|      |                 |              |                 |              |                   |                    |             |                   |                    | C(5)-C(6)-C(1)-C(2)     | -2.0543           |                |                   |
|      |                 |              |                 |              |                   |                    |             |                   |                    | C(5)-C(6)-C(1)-C(50)    | 176.3718          |                |                   |
|      |                 |              |                 |              |                   |                    |             |                   |                    | O(15)-C(6)-C(1)-C(2)    | 179.6471          |                |                   |
|      |                 |              |                 |              |                   |                    |             |                   |                    | O(15)-C(6)-C(1)-C(50)   | -1.9269           |                |                   |
|      |                 |              |                 |              |                   |                    |             |                   |                    | C(6)-C(1)-C(2)-C(3)     | 1.7817            |                |                   |
|      |                 |              |                 |              |                   |                    |             |                   |                    | C(6)-C(1)-C(2)-O(35)    | -179.2798         |                |                   |
|      |                 |              |                 |              |                   |                    |             |                   |                    | C(50)-C(1)-C(2)-C(3)    | -176.7359         |                |                   |
|      |                 |              |                 |              |                   |                    |             |                   |                    | C(50)-C(1)-C(2)-O(35)   | 2.2026            |                |                   |



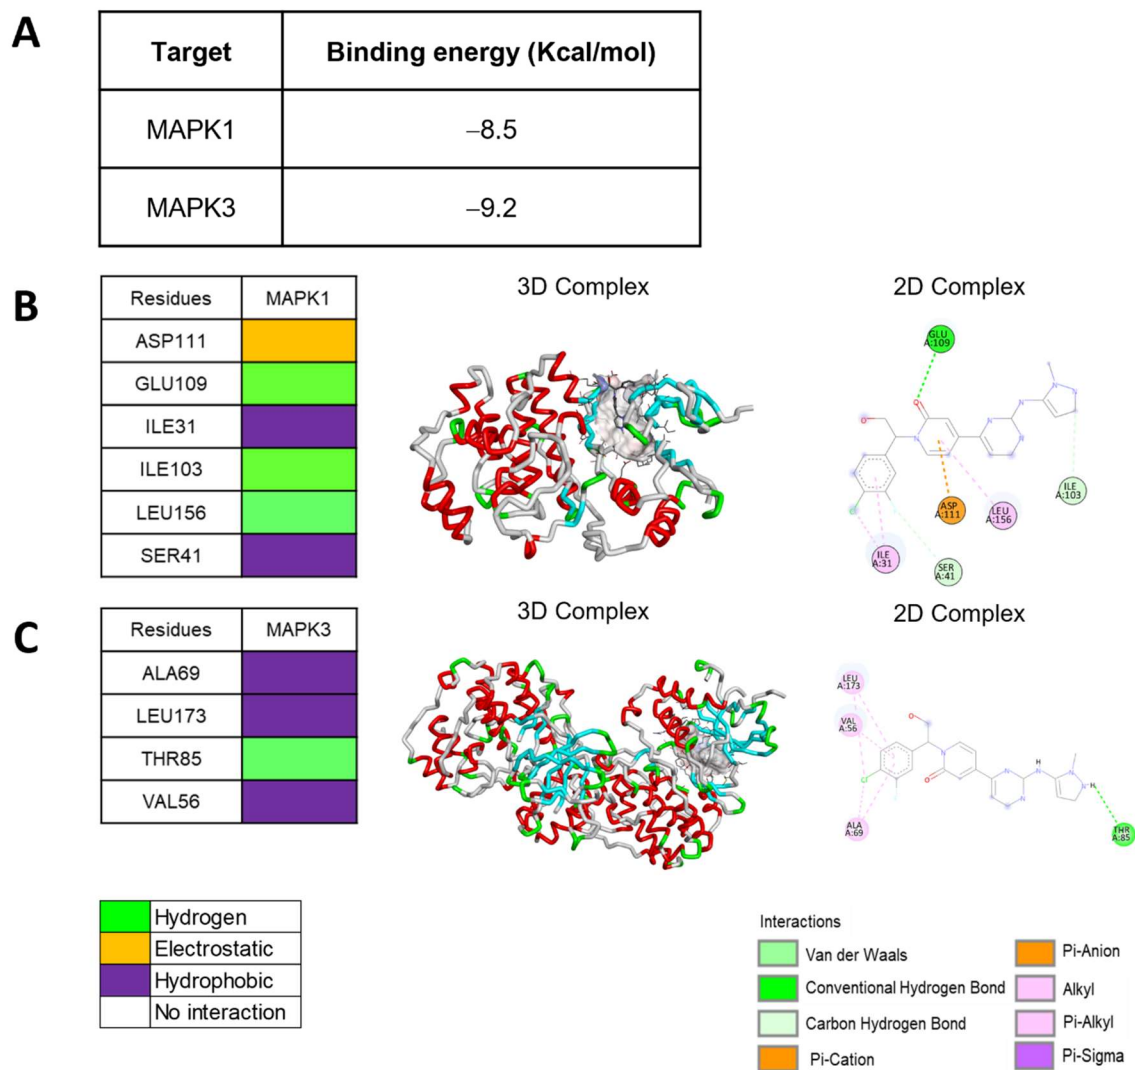

**Figure S17.** Molecular docking of Ravoxertinib, a known ligand of both MAPK1 (ERK2) and MAPK3 (ERK1). (A) Binding energies indicated that the interactions between Ravoxertinib with both MAPK1 and MAPK3. (B) Interactions between the amino acid residues of MAPK1 and Ravoxertinib. (C) Interactions between the amino acid residues of MAPK3 with Ravoxertinib.

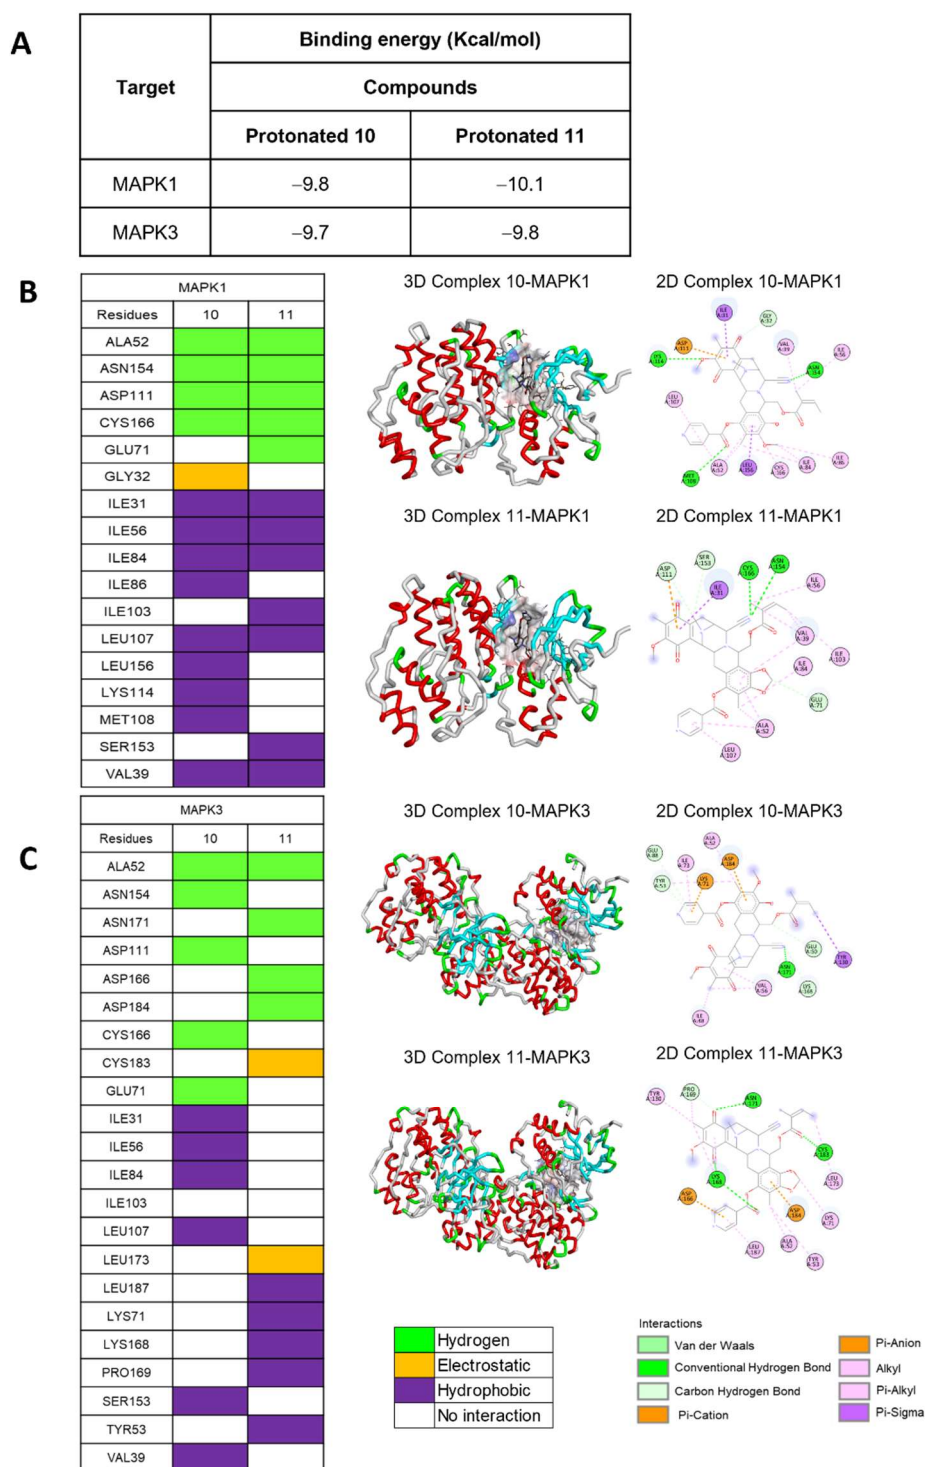

**Figure S17.** Molecular docking of the protonation state of **10** and **11** with both MAPK1 (ERK2) and MAPK3 (ERK1). (A) Binding energies indicated the interactions of the protonation state of **10** and **11** with both MAPK1 and MAPK3. (B) Interactions between the amino acid residues of MAPK1 and both protonation state of **10** and **11**. (C) Interactions between the amino acid residues of MAPK3 with protonation state of **10** and **11**.

## REFERENCES

1. Daikuhara N, Tada Y, Yamaki S, Charupant K, Amnuoypol S, Suwanborirux K, et al. Chemistry of renieramycins. Part 7: Renieramycins T and U, novel renieramycin–ecteinascidin hybrid marine natural products from Thai sponge *Xestospongia* sp. *Tetrahedron Letters*. 2009;50(29):4276-8.
